**Author contributions:** doi: <https://doi.org/10.1101/2021.08.24.457491>; this version posted January 27, 2022. The copyright holder for this preprint (which was not certified by peer review) is the author/funder, who has granted bioRxiv a license to display the preprint in perpetuity. It is made available under aCC-BY-NC-ND 4.0 International license.

Amit Ahlmann: Conceptualization; Formal analysis; Validation; Investigation; Visualization; Methodology; Writing - original draft; Writing - review and editing Amanda McQuade: Conceptualization; Formal analysis; Funding acquisition; Validation; Investigation; Visualization; Methodology; Writing - original draft; Writing - review and editing Alberto Granzotto: Formal analysis; Investigation; Methodology; Writing - review and editing You Kang: Formal analysis; Investigation; Methodology; Writing - review and editing Jean Chadarevian: Investigation; Methodology Sunil Gandhi: Resources; Supervision; Funding acquisition; Writing - review and editing Ian Parker: Resources; Methodology; Writing - review and editing Ian Smith: Formal analysis; Investigation; Writing - review and editing Hansang Cho: Resources; Formal analysis; Supervision; Funding acquisition; Investigation; Methodology; Writing - review and editing Stefano Sensi: Resources; Supervision; Funding acquisition; Methodology Shivashankar Othy: Conceptualization; Resources; Formal analysis; Supervision; Funding acquisition; Investigation; Methodology; Writing - original draft; Project administration; Writing - review and editing Mathew Blurton-Jones: Conceptualization; Resources; Supervision; Funding acquisition; Investigation; Methodology; Writing - original draft; Project administration; Writing - review and editing Michael Cahalan: Conceptualization; Resources; Supervision; Funding acquisition; Methodology; Writing - original draft; Project administration; Writing - review and editing

**Funding:**

HHS | National Institutes of Health (NIH): Michael D Cahalan, R01 NS14609; HHS | National Institutes of Health (NIH): Michael D Cahalan, R01 AI121945; HHS | National Institutes of Health (NIH): Mathew Blurton-Jones, R01 AG048099; HHS | National Institutes of Health (NIH): Mathew Blurton-Jones, R01 AG056303; HHS | National Institutes of Health (NIH): Mathew Blurton-Jones, R01 AG055524; HHS | National Institutes of Health (NIH): Mathew Blurton-Jones, core AG066519; HHS | National Institutes of Health (NIH): Shivashankar Othy, U01 AI160397; HHS | National Institutes of Health (NIH): Amanda McQuade, T32 NS082174; HHS | National Institutes of Health (NIH): Sunil Gandhi, RF1DA048813 The funders had no role in study design, data collection and interpretation, or the decision to submit the work for publication.

**Data Availability:**

RNA sequencing data referenced in Figure 1- figure supplement 2 is available through Gene Expression Omnibus: GSE157652.  
N/A

**Ethics:**

Human Subjects: Yes Ethics Statement: Human iPSC lines were generated by the University of California Alzheimer's Disease Research Center (UCI ADRC) stem cell core. Subject fibroblasts were collected under approved Institutional Review Boards (IRB) and human Stem Cell Research Oversight (hSCRO) committee protocols. Informed consent was received for all participants. Clinical Trial: No Animal Subjects: No

1 **TREM2 regulates purinergic receptor-mediated calcium signaling and motility in**  
2 **human iPSC-derived microglia**

3 Amit Jairaman<sup>1†</sup>, Amanda McQuade<sup>2,3,4†</sup>, Alberto Granzotto<sup>2,5,6</sup>, You Jung Kang<sup>7</sup>, Jean Paul Chadarevian<sup>2</sup>,  
4 Sunil Gandhi<sup>2</sup>, Ian Parker<sup>1,2</sup>, Ian Smith<sup>2</sup>, Hansang Cho<sup>8</sup>, Stefano L. Sensi<sup>5,6</sup>, Shivashankar Othy<sup>1,9</sup>, Mathew  
5 Blurton-Jones<sup>2,3,4,9\*</sup>, Michael Cahalan<sup>1,9\*</sup>

6 **Affiliations:**

7 <sup>1</sup> Department of Physiology & Biophysics, University of California, Irvine, CA 92697-4561, USA

8 <sup>2</sup> Department of Neurobiology & Behavior, University of California, Irvine, CA 92697, USA

9 <sup>3</sup> Sue and Bill Gross Stem Cell Research Center, University of California, Irvine, CA 92697, USA

10 <sup>4</sup> UCI Institute for Memory Impairments and Neurological Disorders, University of California, Irvine, CA  
11 92697, USA

12 <sup>5</sup> Center for Advanced Sciences and Technology (CAST), University "G. d'Annunzio" of Chieti-Pescara,  
13 Chieti 66100, Italy

14 <sup>6</sup> Department of Neuroscience, Imaging, and Clinical Sciences (DNISC), University "G. d'Annunzio" of  
15 Chieti-Pescara, Chieti 66100, Italy

16 <sup>7</sup> Department of Mechanical Engineering and Engineering Science, Center for Biomedical Engineering  
17 and Science, University of North Carolina, Charlotte, NC 28223, USA

18 <sup>8</sup> Institute of Quantum Biophysics, Department of Biophysics, Sungkyunkwan University, 2066 Seobu-ro,  
19 Jangan-gu, Suwon-si, Gyeonggi-do 16419, Korea

20 <sup>9</sup> Institute for Immunology, University of California, Irvine, CA 92697, USA

21

22 † Equal contributions

23 \* Co-corresponding authors: Michael D. Cahalan ([mcahalan@uci.edu](mailto:mcahalan@uci.edu)), Mathew Blurton-Jones

24 ([mblurton@uci.edu](mailto:mblurton@uci.edu))

25 Key Words: microglia, motility, Alzheimer's disease, P2Y receptor, Ca<sup>2+</sup> signaling, store-operated Ca<sup>2+</sup>

26 entry (SOCE), genetically encoded Ca<sup>2+</sup> indicator, TREM2

27

28 **Abstract**

29 The membrane protein TREM2 (Triggering Receptor Expressed on Myeloid cells 2) regulates key  
30 microglial functions including phagocytosis and chemotaxis. Loss-of-function variants of TREM2  
31 are associated with increased risk of Alzheimer's disease (AD). Because abnormalities in  $\text{Ca}^{2+}$   
32 signaling have been observed in several AD models, we investigated TREM2 regulation of  $\text{Ca}^{2+}$   
33 signaling in human induced pluripotent stem cell-derived microglia (iPSC-microglia) with genetic  
34 deletion of TREM2. We found that iPSC-microglia lacking TREM2 (TREM2 KO) show exaggerated  
35  $\text{Ca}^{2+}$  signals in response to purinergic agonists, such as ADP, that shape microglial injury  
36 responses. This ADP hypersensitivity, driven by increased expression of  $\text{P2Y}_{12}$  and  $\text{P2Y}_{13}$   
37 receptors, results in greater release of  $\text{Ca}^{2+}$  from the endoplasmic reticulum (ER) stores, which  
38 triggers sustained  $\text{Ca}^{2+}$  influx through Orai channels and alters cell motility in TREM2 KO  
39 microglia. Using iPSC-microglia expressing the genetically encoded  $\text{Ca}^{2+}$  probe, Salsa6f, we  
40 found that cytosolic  $\text{Ca}^{2+}$  tunes motility to a greater extent in TREM2 KO microglia. Despite  
41 showing greater overall displacement, TREM2 KO microglia exhibit reduced directional  
42 chemotaxis along ADP gradients. Accordingly, the chemotactic defect in TREM2 KO microglia  
43 was rescued by reducing cytosolic  $\text{Ca}^{2+}$  using a  $\text{P2Y}_{12}$  receptor antagonist. Our results show that  
44 loss of TREM2 confers a defect in microglial  $\text{Ca}^{2+}$  response to purinergic signals, suggesting a  
45 window of  $\text{Ca}^{2+}$  signaling for optimal microglial motility.

46

47 **Main Text**

48 **Introduction**

49 As the primary immune cells of the central nervous system, microglia survey their local  
50 environment to maintain homeostasis and respond to local brain injury or abnormal neuronal  
51 activity. Microglia are strongly implicated in several neurodevelopmental and  
52 neurodegenerative diseases<sup>1-7</sup>, warranting further study of human microglial dynamics.  
53 Purinergic metabolites (ATP, ADP, UTP, UDP) in the brain constitute key signals driving  
54 microglial activation and chemotaxis, **and are detected by microglial cells over concentrations**  
55 **ranging from hundreds of nM to  $\mu$ M**<sup>8-13</sup>. ATP released from both homeostatic and damaged  
56 cells is hydrolyzed locally by nucleosidases such as the ectonucleotidase NTPDase1 (CD39) or  
57 pyrophosphatase NPP1 to produce ADP<sup>14-16</sup>. ADP is then detected by P2Y purinergic receptors  
58 on microglia, causing IP<sub>3</sub>-dependent Ca<sup>2+</sup> release from the endoplasmic reticulum (ER) lumen.  
59 Ca<sup>2+</sup> depletion from the ER in turn activates ER STIM1 proteins to translocate proximally to  
60 puncta where closely apposed plasma membrane (PM) Orai1 channels are activated. This  
61 mechanism underlies store-operated Ca<sup>2+</sup> entry (SOCE) in many cell types<sup>17</sup>, including  
62 microglia<sup>18-20</sup>.

63 Purinergic signaling is central to microglial communication with other brain cell types  
64 and has been negatively correlated with the onset of Disease-Associated Microglia (DAM)  
65 transcriptional states<sup>21-25</sup>. P2Y<sub>12</sub> and P2Y<sub>13</sub> receptors are highly expressed by microglia and are  
66 activated predominantly by ADP<sup>16,26</sup>. P2Y<sub>12</sub> receptors are essential for microglial chemotaxis  
67 and have been implicated in the microglial response to cortical injury<sup>12,27</sup>, NLRP3 inflammasome  
68 activation<sup>28,29</sup>, neuronal hyperactivity and protection<sup>27,30</sup>, and blood brain barrier

69 maintenance<sup>31,32</sup>. While purinergic receptors have been broadly identified as markers of  
70 microglial homeostasis<sup>23,26</sup>, mechanisms by which receptor expression may drive or maintain  
71 homeostatic microglial states remain incompletely understood.

72         Neuroinflammatory pathologies are often associated with altered Ca<sup>2+</sup> signaling<sup>33</sup>.  
73 Microglia, in particular, show altered Ca<sup>2+</sup> responses in mouse models of Alzheimer's Disease  
74 (AD) by mechanisms that are not fully understood<sup>34-36</sup>. Ca<sup>2+</sup> responses to purinergic metabolites  
75 have been extensively studied in cultured murine microglia, acute brain slices, and more  
76 recently in anesthetized mice<sup>8,10,34,37-39</sup>. However, our understanding of how specific patterns  
77 of Ca<sup>2+</sup> signals in microglia correlate with and tune downstream microglial responses such as  
78 cell motility or process extension remains incomplete. There is also a paucity of knowledge on  
79 how regulators of purinergic Ca<sup>2+</sup> signals in microglia might play a role in the dysregulation of  
80 Ca<sup>2+</sup> signaling associated with aging and neuroinflammation.

81         TREM2 encodes a cell surface receptor that binds a variety of ligands including various  
82 lipids, apolipoprotein E (ApoE), and amyloid- $\beta$  peptides. Upon ligand binding, TREM2 signals  
83 through its adaptor protein DAP12 to activate a host of downstream pathways<sup>23,40-42</sup>. Loss of  
84 TREM2 function is thought to promote a more homeostatic-like state<sup>23,43,44</sup>. Indeed, microglia  
85 lacking TREM2 expression exhibit greatly diminished activation against disease pathology,  
86 correlating with increased risk of AD<sup>23,41,45</sup>. Purinergic receptor hyperexpression has been  
87 reported at the transcriptome level across multiple TREM2 loss of function models including  
88 human patient mutations<sup>21-23,25,41,46</sup>. For example, P2Y<sub>12</sub> receptor protein expression was found  
89 to be elevated in the cortical microglia of *Trem2*<sup>-/-</sup> mice and in a preclinical mouse model of

90 AD<sup>47,48</sup>, although the mechanistic link between purinergic receptor expression and TREM2  
91 function remains poorly understood.

92 We previously developed methods to generate human induced pluripotent stem cell-  
93 derived microglia (iPSC-microglia)<sup>49-51</sup>, which can be used to model human microglial behavior.  
94 While iPSC-microglia are proving increasingly useful to investigate neurodegenerative  
95 disorders<sup>41,52-56</sup>, Ca<sup>2+</sup> signaling has not yet been extensively profiled in these models. In this  
96 study, we compared purinergic Ca<sup>2+</sup> signaling and motility characteristics in WT and TREM2 KO  
97 human iPSC-microglia, and examined the mechanisms that underlie enhanced purinergic Ca<sup>2+</sup>  
98 signaling in microglia lacking TREM2. We find that motility is differentially tuned by Ca<sup>2+</sup> in  
99 TREM2 KO cells with consequences for chemotaxis.

100

101 **Results**

102 **Purinergic receptor Ca<sup>2+</sup> signaling is enhanced in TREM2-knockout human iPSC-microglia**

103 To determine if TREM2 plays a role in microglial Ca<sup>2+</sup> signaling, we compared cytosolic Ca<sup>2+</sup>  
104 responses to the purinergic agonist ADP in isogenic, CRISPR-modified wild type (WT) and  
105 TREM2-knockout (TREM2 KO) human iPSC-microglia. ADP stimulation induced a biphasic Ca<sup>2+</sup>  
106 response – a rapid initial peak followed by a secondary phase of sustained Ca<sup>2+</sup> elevation lasting  
107 several minutes, in line with previous observations in mouse microglia<sup>57,58</sup>. Both phases of the  
108 Ca<sup>2+</sup> response were significantly elevated in TREM2 KO microglia, raising the possibility that  
109 augmentation of the initial Ca<sup>2+</sup> response to ADP in TREM2 KO microglia may be coupled to a  
110 larger sustained component of Ca<sup>2+</sup> entry (**Figure 1A, B**). These results were corroborated in  
111 iPSC-derived microglia cell line expressing the genetically-encoded Ca<sup>2+</sup> indicator Salsa6f<sup>59,60</sup>  
112 (**Figure 1C, D**). The Salsa6f probe showed the expected increase in the GCaMP6f fluorescence in  
113 response to Ca<sup>2+</sup> elevation without any change in the tdTomato signal, and it did not perturb  
114 microglial activation and function (**Figure 1-figure supplement 1A-G**). TREM2 KO microglia also  
115 showed exaggerated Ca<sup>2+</sup> responses to the purinergic agonists ATP and UTP at similar low  $\mu\text{M}$   
116 concentrations, although the secondary Ca<sup>2+</sup> elevations were not as long-lasting as with ADP  
117 (**Figure 1E, F and Figure 1-figure supplement 2**).

118

119 **Increased P2Y<sub>12</sub> and P2Y<sub>13</sub> receptor expression drives increased peak Ca<sup>2+</sup> in TREM2-KO**  
120 **microglia**

121 Given the critical importance of ADP signaling in several aspects of microglial function, we  
122 investigated the mechanisms driving higher ADP-evoked Ca<sup>2+</sup> signals in TREM2 KO microglia by

123 focusing on specific steps in the purinergic Ca<sup>2+</sup> signaling pathway (**Figure 2A**). The initial Ca<sup>2+</sup>  
124 response to P2Y receptor engagement results from G protein-coupled phospholipase C  
125 activation, and IP<sub>3</sub>-mediated ER Ca<sup>2+</sup> store-release. To test this, we treated cells with ADP in  
126 Ca<sup>2+</sup>-free solution buffered with the Ca<sup>2+</sup> chelator EGTA to isolate Ca<sup>2+</sup> signals from store-  
127 release and eliminate Ca<sup>2+</sup> influx across the PM. Both WT and TREM2 KO cells exhibited a single  
128 Ca<sup>2+</sup> peak, with TREM2 KO cells showing significantly higher peak Ca<sup>2+</sup> response to ADP (**Figure**  
129 **2B and Figure 2-figure supplement 1A, B**). Moreover, the amplitude of the Ca<sup>2+</sup> peak was not  
130 significantly different in the presence or absence of external Ca<sup>2+</sup>, strongly suggesting that it is  
131 driven primarily by release of Ca<sup>2+</sup> from intracellular stores even when external Ca<sup>2+</sup> is present  
132 (**Figure 2-figure supplement 1C**). Dose-response curves for the peak Ca<sup>2+</sup> response showed a  
133 steep leftward shift in TREM2 KO cells (**Figure 2C**). The EC<sub>50</sub> value for WT microglia was 650 nM,  
134 whereas TREM2 KO microglia reached their EC<sub>50</sub> by 15 nM. This stark difference was driven at  
135 least in part by a diminished percentage of WT cells responding to ADP at low μM doses (**Figure**  
136 **2D**). However, limiting the analysis to cells that showed a Ca<sup>2+</sup> rise revealed that “responding”  
137 TREM2 KO cells still exhibited higher Ca<sup>2+</sup> responses to ADP than “responding” WT cells (**Figure**  
138 **2E**). TREM2 KO microglia are thus significantly more sensitive to ADP than WT cells which may  
139 be critical in sensing ADP and in detecting ADP gradients.

140 RNA-sequencing revealed significantly increased transcripts for P2Y<sub>12</sub> and P2Y<sub>13</sub>  
141 receptors, the main P2Y receptor subtypes in microglia that bind ADP, in TREM2 KO  
142 microglia<sup>49,50</sup> (**Figure 2F**). In comparison, relative mRNA levels of common mediators of Ca<sup>2+</sup>  
143 signaling – including predominant isoforms of IP<sub>3</sub> receptors, SOCE mediators Orai and STIM  
144 proteins, and SERCA and PMCA Ca<sup>2+</sup> pumps – were either similar or modestly reduced in TREM2



145 KO in comparison with WT iPSC-microglia (**Figure 2-figure supplement 1D, E**). We therefore  
146 considered the possibility that signal amplification in microglia lacking TREM2 results primarily  
147 from increased expression of P2Y<sub>12</sub> and P2Y<sub>13</sub> receptors. Consistent with this, expression of  
148 P2Y<sub>12</sub> receptors in the plasma membrane was significantly increased in TREM2 KO cells (**Figure**  
149 **2G**). Furthermore, Ca<sup>2+</sup> responses to ADP in Ca<sup>2+</sup>-free medium were completely abolished  
150 following treatment with a combination of P2Y<sub>12</sub> and P2Y<sub>13</sub> receptor antagonists (PSB 0739 and  
151 MRS 2211 respectively) in both WT and TREM2 KO microglia (**Figure 2H**). Treatment of cells  
152 with P2Y<sub>12</sub> and P2Y<sub>13</sub> receptor antagonists separately produced partial inhibition of peak ADP-  
153 mediated Ca<sup>2+</sup> signals, implicating involvement of both receptor subtypes (**Figure 2-figure**  
154 **supplement 1F, G**). In summary, deletion of TREM2 results in a larger cytosolic Ca<sup>2+</sup> peak in  
155 response to ADP due to increased expression of P2Y<sub>12</sub> and P2Y<sub>13</sub> receptors.

156

### 157 **SOCE through Orai channels mediates the sustained phase of ADP-evoked Ca<sup>2+</sup> elevation**

158 To probe the basis for the increased sustained component of ADP-evoked Ca<sup>2+</sup> signal in TREM2  
159 KO microglia, we examined SOCE using pharmacological and genetic approaches. Synta66, a  
160 reasonably specific inhibitor of Orai channels, significantly reduced the rate of SOCE following  
161 Ca<sup>2+</sup> re-addition after ER store-depletion by the sarco-endoplasmic reticulum Ca<sup>2+</sup> ATPase  
162 (SERCA pump) inhibitor, thapsigargin (TG) in both WT and TREM2 KO microglia (**Figure 3A and**  
163 **Figure 3-figure supplement 1A**). Using a similar Ca<sup>2+</sup> re-addition protocol with ADP, we found  
164 significant inhibition of ADP-induced SOCE by Synta66 in both WT and TREM2 KO cells (**Figure**  
165 **3B and Figure 3-figure supplement 1B**). The ADP-evoked sustained Ca<sup>2+</sup> phase in TREM2 KO  
166 iPSC-microglia was also blocked by less specific Orai channel inhibitors, Gd<sup>3+</sup> and 2-APB (**Figure**

167 **3-figure supplement 1C, D).** To further confirm the specific role of Orai1 channels in mediating  
168 SOCE, we generated an Orai1 CRISPR-knockout iPSC line. Deletion of Orai1 abrogated SOCE and  
169 significantly reduced the sustained  $\text{Ca}^{2+}$  response to ADP (**Figure 3-figure supplement 1E, F**).  
170 These results confirm that Orai1 plays an important role in mediating SOCE and ADP-evoked  
171  $\text{Ca}^{2+}$  signals in iPSC-microglia.

172 To determine if SOCE is increased in TREM2 KO microglia and contributing to the higher  
173 sustained  $\text{Ca}^{2+}$  response to ADP, we compared the rate of store-operated  $\text{Ca}^{2+}$  influx after store-  
174 depletion with TG, and found that both the rate and amplitude of SOCE were modestly reduced  
175 in TREM2 KO cells (**Figure 3C**). In keeping with this, RNA sequencing revealed a modest  
176 reduction in STIM1 mRNA expression in TREM2 KO cells, although Orai1 mRNA was similar in  
177 WT and TREM2 KO microglia (**Figure 2-figure supplement 1C, D**). We further conclude that the  
178 elevated secondary phase of ADP-driven  $\text{Ca}^{2+}$  signals in TREM2 KO microglia is not primarily due  
179 to differences in the expression of STIM and Orai.

180

181 **ADP depletes ER  $\text{Ca}^{2+}$  stores to a greater extent in TREM2 KO microglia leading to greater**  
182 **SOCE activation**

183 We hypothesized that the exaggerated secondary  $\text{Ca}^{2+}$  phase in response to ADP in TREM2 KO  
184 microglia may be driven by increased ER  $\text{Ca}^{2+}$  store-release leading to greater SOCE activation.  
185 Consistent with this possibility, peak cytosolic  $\text{Ca}^{2+}$  in response to partial store-depletion with  
186 ADP, and after  $\text{Ca}^{2+}$  re-addition was elevated in TREM2 KO microglia (**Figure 3D**). To examine if  
187 the higher magnitude of SOCE in TREM2 KO cells is due to depletion of ER  $\text{Ca}^{2+}$  stores by ADP,  
188 we sequentially treated cells with ADP followed by ionomycin to completely release stores in

189  $\text{Ca}^{2+}$  free buffer. While TREM2 KO cells showed greater peak  $\text{Ca}^{2+}$  with ADP as expected, the  
190 ionomycin  $\text{Ca}^{2+}$  peak – which reflects the residual ER  $\text{Ca}^{2+}$  pool – was significantly reduced  
191 indicating that ADP depletes ER  $\text{Ca}^{2+}$  stores to a greater extent in TREM2 KO cells (**Figure 3E**).  
192 Similar results were obtained when residual ER store-content was depleted using TG instead of  
193 ionomycin (**Figure 3- figure supplement 2A, B**). We plotted cytosolic  $\text{Ca}^{2+}$  levels 5 minutes after  
194 addition of varying doses of ADP to indicate the degree of SOCE, as a function of the initial peak  
195  $\text{Ca}^{2+}$ , a readout of ER store-release (**Figure 3- figure supplement 2C, D**). Both WT and TREM2 KO  
196 microglia showed similar linear relationships between SOCE and store-release, further  
197 suggesting that SOCE is activated by similar mechanisms in the two cell lines, but is recruited to  
198 a greater extent in TREM2 KO cells due to increased ER store-release. We also note that  
199 increased sustained  $\text{Ca}^{2+}$  in TREM2 KO cells is unlikely to be due to differences in  $\text{Ca}^{2+}$  pump  
200 activity based on similar  $\text{Ca}^{2+}$  clearance rates (**Figure 3- figure supplement 2E, F**), consistent  
201 with comparable transcriptomic expression of major SERCA and plasma membrane  $\text{Ca}^{2+}$  ATPase  
202 (PMCA) isoforms in WT and TREM2 KO cells (**Figure 2- figure supplement 1C, D**).

203 Finally, quantification of cumulative cytosolic  $\text{Ca}^{2+}$  increases after maximally depleting  
204 ER stores with ionomycin alone suggested that overall ER store-content is not altered in  
205 microglia lacking TREM2 (**Figure 3F**). Comparison of  $\text{Ca}^{2+}$  responses to  $\text{IP}_3$  uncaging also ruled  
206 out major differences in the pool of functional  $\text{IP}_3$  receptors between WT and TREM2 KO cells  
207 (**Figure 3G**), as further substantiated by similar transcriptomic expression of  $\text{IP}_3$  receptor type 2  
208 (the major  $\text{IP}_3\text{R}$  subtype expressed in iPSC-microglia) in WT and TREM2 KO cells (**Figure 2-figure**  
209 **supplement 1C, D**)<sup>41,49</sup>. In summary, deletion of TREM2 in iPSC-derived microglia leads to  
210 upregulation of P2Y<sub>12</sub> and P2Y<sub>13</sub> receptors and renders the cells hypersensitive to ADP signaling,

211 consequently leading to greater IP<sub>3</sub>-mediated ER store-depletion and increased coupling to  
212 SOCE in response to purinergic metabolites.

213

#### 214 **ADP potentiates cell motility and process extension in human WT iPSC-microglia**

215 ADP is a potent chemoattractant for microglia<sup>10</sup>. Analogous to a previous study in fibroblasts<sup>61</sup>,  
216 we found that ADP treatment alters cell motility and leads to increased rates of scratch wound  
217 closure in WT iPSC-microglia (**Figure 4A**). To investigate the cellular mechanism of accelerated  
218 wound closure, we used time-lapse imaging to track open-field microglial cell motility (**Figure**  
219 **4B**). Mean cell track speed and track displacement (defined as the overall change in position  
220 from the origin at a given time) were both increased after application of ADP. On the other  
221 hand, average track straightness, [an indicator of how frequently cells change direction](#), was  
222 unaltered by ADP (**Figure 4C**). These data suggest that ADP-driven changes in motility in WT  
223 iPSC-microglia primarily arise from increases in microglial speed, and not altered turning  
224 behavior. ADP-dependent increases in speed were reversed in the presence of P2Y<sub>12</sub> (PSB 0739)  
225 and P2Y<sub>13</sub> (MRS 2211) receptor antagonists, confirming the role of these two purinergic  
226 receptors in ADP enhancement of microglial motility (**Figure 4D**). To determine if Ca<sup>2+</sup> influx  
227 regulates ADP-mediated increases in motility, we measured cell migration with ADP in Ca<sup>2+</sup>-free  
228 medium and found that removing extracellular Ca<sup>2+</sup> significantly decreased cell speed,  
229 displacement, and track straightness, suggesting that sustained Ca<sup>2+</sup> signals are required for  
230 maximal increase in motility in response to ADP (**Figure 4E**).

231 In addition, some microglia responded to ADP by extending processes and altering their  
232 morphology rather than increasing motility (**Figure 4-figure supplement 1**). Microglia have

233 been observed to extend processes in response to injury and purinergic stimulation in brain  
234 slices<sup>8,12</sup>. Therefore, we compared process complexity before and 30 min after ADP exposure in  
235 WT microglia and observed significant increases in both the number of branches per process  
236 and total length of these processes (**Figure 4F**). Similar to effects on cell motility, ADP-mediated  
237 process extension was inhibited by P2Y<sub>12</sub> and P2Y<sub>13</sub> receptor antagonists (PSB 0739 and MRS  
238 2211 respectively). Furthermore, even before process extension was activated with ADP, cells  
239 treated with P2Y antagonists showed significantly fewer and shorter processes, [suggesting that](#)  
240 [baseline purinergic signaling may regulate resting microglial process dynamics](#). Altogether,  
241 these results demonstrate that [activation of purinergic signaling through P2Y<sub>12</sub> and P2Y<sub>13</sub>](#)  
242 [receptors is required for ADP-driven microglial process extension and motility](#).

243

#### 244 **ADP-evoked changes in cell motility and process extension are enhanced in TREM2-KO** 245 **microglia**

246 To characterize differences in motility characteristics between WT and TREM2 KO microglia  
247 responding to ADP, we plotted mean squared displacement (MSD) vs time and compared cell  
248 track overlays (flower plots) which showed that ADP enhances motility in TREM2 KO cells to a  
249 greater extent than in WT microglia (**Figure 5A, B**). Baseline motility characteristics in  
250 unstimulated cells, however, were similar in WT and TREM2 KO cells (**Figure 5-figure**  
251 **supplement 1A, B**). To further understand the basis of differences in ADP-induced motility  
252 between WT and TREM2 KO cells, we analyzed mean track speed, track displacement, and track  
253 straightness. Although mean track speeds were similar, TREM2 KO microglia showed greater  
254 displacement than WT cells (**Figure 5C, D**), raising the possibility that TREM2 KO cells may turn

255 with lower frequency. Consistent with this, analysis of track straightness revealed that TREM2  
256 KO microglia move farther from their origin for the same total distance traveled (**Figure 5E**).  
257 Vector autocorrelation, an analysis of directional persistence<sup>62</sup>, further confirmed that WT cells  
258 turn more frequently than TREM2 KO microglia in response to ADP (**Figure 5-figure supplement**  
259 **1C, D**). To assess if these differences in TREM2 KO cells require sustained  $\text{Ca}^{2+}$  influx, we  
260 analyzed microglial motility in response to ADP stimulation in the absence of extracellular  $\text{Ca}^{2+}$   
261 (**Figure 5F-J**). Mean-squared displacement (MSD) and cell-track overlay plots showed that  
262 motility is constrained when  $\text{Ca}^{2+}$  is removed from the external bath in both WT and TREM2 KO  
263 cells (**Figure 5A, B vs. F, G**). In the absence of extracellular  $\text{Ca}^{2+}$ , TREM2 KO microglia showed  
264 similar mean speed, displacement, and track-straightness as WT cells (**Figure 5C-E vs H-J**). We  
265 conclude that increases in microglial motility (mean speed, displacement, and straightness)  
266 require sustained  $\text{Ca}^{2+}$  influx, and that deletion of TREM2 reduces microglial turning in response  
267 to ADP.

268 We next analyzed the effects of TREM2 deletion on process-extension in microglia.  
269 Treatment with ADP induced a dramatic increase in the number of branches and length of  
270 processes extended in both WT and TREM2 KO microglia (**Figure 5K, L**). Comparison of the  
271 absolute number of branches and process length after ADP treatment, as well as the relative  
272 fold-increase in these parameters from baseline indicated that process extension is not affected  
273 in TREM2 KO microglia (**Figure 5K-M, figure 5-figure supplement 2A, B**). We note that the  
274 greater fold-change in process extension in TREM2 KO cells can be attributed to the reduced  
275 morphological complexity of these cells prior to stimulation. Finally, ADP stimulation in  $\text{Ca}^{2+}$ -  
276 free medium did not induce process extension in WT cells, and only a modest increase in

277 TREM2 KO cells (**Figure 5-figure supplement 2A and B vs C and D**). Together, these results  
278 indicate that sustained  $\text{Ca}^{2+}$  entry across the PM is required for optimal microglial process  
279 extension in both WT and TREM2 KO microglia.

280

### 281 **Cytosolic $\text{Ca}^{2+}$ levels tune motility in TREM2 KO iPSC-microglia**

282 To further characterize the effects of sustained  $\text{Ca}^{2+}$  signals on microglial motility, we used  
283 Salsa6f-expressing iPSC WT and TREM2 KO reporter lines to monitor cytosolic  $\text{Ca}^{2+}$  and motility  
284 simultaneously in individual cells (**Figure 6-figure supplement 1**). To isolate the effects of  
285 sustained  $\text{Ca}^{2+}$  elevations on microglia motility, and eliminate any contribution from  $\text{Ca}^{2+}$   
286 independent signaling pathways, we used a protocol that relies on triggering SOCE and varying  
287 external  $\text{Ca}^{2+}$  to maintain cytosolic  $\text{Ca}^{2+}$  at “low” or “high” levels in the Salsa6f reporter line  
288 (**Figure 6A-C**), similar to our previous study in T lymphocytes<sup>63</sup>. In WT cells, lowering  
289 extracellular  $\text{Ca}^{2+}$  from 2 to 0.2 mM predictably decreased the G/R ratio but did not influence  
290 mean track speed, 10-minute track displacement, or track straightness (**Figure 6C, D top**).  
291 However, in TREM2 KO microglia, reducing  $\text{Ca}^{2+}$  to a lower level significantly increased speed,  
292 displacement, and track straightness (**Figure 6C, D bottom**). These data suggest that motility  
293 characteristics of TREM2 KO microglia are more sensitive to changes in cytoplasmic  $\text{Ca}^{2+}$  levels  
294 than in WT cells. Similar results were obtained upon addition of ADP in this paradigm,  
295 suggesting that long-lasting  $\text{Ca}^{2+}$  elevations may override effects of  $\text{Ca}^{2+}$ -independent ADP  
296 signaling on cell motility (**Figure 6-figure supplement 2A**).

297 To further analyze the  $\text{Ca}^{2+}$  dependence of microglial motility, we plotted Salsa6f G/R  
298  $\text{Ca}^{2+}$  ratios for each individual cell at every time point against the instantaneous speeds of that

299 cell (**Figure 6E**). These data revealed a stronger dependence of instantaneous speed on  $\text{Ca}^{2+}$   
300 levels in TREM2 KO microglia (**Figure 6F**). Furthermore, when stratifying cell speed arbitrarily as  
301 “fast” ( $> 10 \mu\text{m}/\text{min}$ ) or “slow” ( $< 10 \mu\text{m}/\text{min}$ ), we observe a marked reduction in the  
302 percentage of “fast” cells when  $\text{Ca}^{2+}$  levels are high in TREM2 KO microglia (**Figure 6G**).  
303 Interestingly, frame-to-frame cell displacement correlated with cytosolic  $\text{Ca}^{2+}$  to the same  
304 degree in both WT and KO cells (**Figure 6-figure supplement 2B, C**). Together, TREM2 KO  
305 human microglia are more sensitive to tuning of motility by cytosolic  $\text{Ca}^{2+}$  than WT cells.

306

### 307 **Chemotactic defects in TREM2 KO microglia are rescued by dampening purinergic receptor** 308 **activity**

309 To assess the physiological significance of TREM2 deletion on microglial motility over longer  
310 time scales, we performed a scratch wound assay. At baseline, both WT and TREM2 KO  
311 microglia migrated into the cell free area at similar rates, consistent with our previous findings<sup>41</sup>  
312 (**Figure 7- figure supplement 1**). Addition of ADP to this system accelerated the scratch wound  
313 closure rates to the same extent in WT and TREM2 KO. *In vivo*, directed migration of microglia is  
314 often driven by gradients of ADP from dying or injured cells<sup>12,30</sup>. Because no chemical gradient  
315 is formed in the scratch wound assay<sup>64</sup>, we studied microglial chemotaxis toward ADP over a  
316 stable gradient using two-chamber microfluidic devices. Consistent with previous findings, WT  
317 iPSC-microglia directionally migrated up the concentration gradient of ADP resulting in higher  
318 numbers of cells within the central chamber<sup>41,65</sup>. In the absence of a chemotactic cue, this  
319 directional migration was lost (**Figure 7A**). This assay revealed a deficit of chemotaxis in TREM2  
320 KO microglia (**Figure 7A**), mirroring reports that TREM2 KO microglia are unable to migrate



321 toward amyloid plaques in AD<sup>40,41,66</sup>. Given that ADP hypersensitivity in TREM2 KO cells is driven  
322 by increased expression of P2Y receptors, we examined the effects of dampening P2Y signaling  
323 to WT levels. Treatment with the P2Y<sub>12</sub> receptor antagonist, PSB 0739, reduced Ca<sup>2+</sup> responses  
324 in TREM2 KO cells and rescued the migration deficit in the chemotaxis assay (**Figure 7B-C**).  
325 These results link the increased Ca<sup>2+</sup> signals and altered motility characteristics evoked by ADP  
326 in TREM2 KO cells to microglial chemotaxis toward areas of tissue damage, a vital functional  
327 response in microglia.  
328

## 329 Discussion

330 This study focuses on two aims: understanding the roles of purinergic signaling in regulating  
331 human microglial motility behavior; and elucidating the impact of TREM2 loss of function on  
332 this  $\text{Ca}^{2+}$  signaling pathway. We find that sustained  $\text{Ca}^{2+}$  influx in response to ADP regulates  
333 microglial process extension, motility speed, and turning behavior. A key observation in our  
334 study is that microglia lacking TREM2 are highly sensitive to ADP-mediated signaling and show  
335 exaggerated cytoplasmic  $\text{Ca}^{2+}$  responses. Using novel iPSC-microglia lines that express a  
336 ratiometric, genetically encoded  $\text{Ca}^{2+}$  probe, Salsa6f, we found that the motility characteristics  
337 of human wild-type and TREM2-knockout microglia are differentially tuned by  $\text{Ca}^{2+}$  signaling.  
338 Informed by these discoveries, we were able to rescue chemotactic deficiencies in TREM2-  
339 knockout microglia by dampening purinergic receptor signaling.

340 We provide several lines of evidence to show that hyper-responsiveness to purinergic  
341 ADP signaling in TREM2 KO microglia is driven primarily by increased purinergic P2Y<sub>12</sub> and P2Y<sub>13</sub>  
342 receptor expression: (1)  $\text{Ca}^{2+}$  response is completely abrogated in the presence of P2Y<sub>12</sub> and  
343 P2Y<sub>13</sub> receptor inhibitors; (2) RNA-sequencing data shows significant increase in expression of  
344 P2Y<sub>12</sub> and P2Y<sub>13</sub> receptor transcripts but minimal fold-change in other regulators of  $\text{Ca}^{2+}$   
345 signaling (IP3R, STIM, Orai, SERCA and PMCA); and (3) labelling of surface P2Y<sub>12</sub> receptors  
346 shows greater PM expression in the TREM2 KOs. Furthermore, functional assays rule out any  
347 role for  $\text{Ca}^{2+}$  clearance mechanisms or any difference in maximal IP<sub>3</sub> and SOCE activity as a  
348 cause of increased sustained  $\text{Ca}^{2+}$  signal in TREM2 KO cells. Mechanistically, this increase in  $\text{Ca}^{2+}$   
349 signals is driven by enhanced IP<sub>3</sub>-mediated ER store-release coupled to SOCE. Indeed, based on  
350 the dose-response curves for peak ADP- $\text{Ca}^{2+}$  responses in  $\text{Ca}^{2+}$  free buffer, TREM2 KO cells have

351 an EC<sub>50</sub> at least 10-fold lower than WT cells. As a functional consequence, TREM2 KO microglia  
352 exhibit a defect in turning behavior, and show greater displacement over time despite moving  
353 with similar speeds as the WT cells. The increased frequency in turning in WT microglia (relative  
354 to TREM KO cells) reflects greater canceling of the velocity vectors, which take the direction of  
355 motility into account. This restricts cell motility to more confined regions, potentially allowing  
356 for more frequent path correction. It is important to note that these motility differences with  
357 ADP are observed after acute treatment and in the absence of any gradient.

358 Interestingly, deletion of TREM2 had no significant impact on scratch wound closure  
359 rates, over a time scale of 24 hours in the presence of a constant concentration of ADP<sup>67</sup>.  
360 However, we find in a directional chemotaxis assay towards a gradient of ADP concentration  
361 that TREM2 KO cells are unable to migrate as efficiently as WT cells, concordant with previous  
362 studies showing reduced migration of TREM2 KO cells towards A $\beta$  plaques<sup>41</sup>. Enhanced ADP  
363 signaling likely abolishes the ability of TREM2 KO cells to distinguish gradations of the agonist,  
364 and this loss of gradient-sensing results in an inability to perform directed migration. We  
365 speculate that increased ADP Ca<sup>2+</sup> signaling in TREM2 KO cells may result in Ca<sup>2+</sup> signaling  
366 domains that are no longer restricted to the cell region near to the highest ADP concentrations,  
367 and disrupt the polarity of key signaling molecules that drive directed cell motility.

368 The amplitude and duration of Ca<sup>2+</sup> signals shape specificity of downstream cellular  
369 responses. Our experiments with ADP in Ca<sup>2+</sup> free medium revealed that a transient Ca<sup>2+</sup> signal  
370 is insufficient to induce microglial motility in either WT or TREM2 KO cells. Previous studies  
371 have shown that mouse microglia with genetic deletion of STIM1 or Orai1 also show defects in  
372 cell migration to ATP<sup>57,68</sup>, likely because diminished SOCE renders them unable to sustain Ca<sup>2+</sup>

373 signals in response to ATP. The dependence of motility on prolonged purinergic Ca<sup>2+</sup> signals  
374 may thus be a general feature of microglia. In contrast, a Ca<sup>2+</sup> transient can initiate some  
375 process extension in TREM2 KO but not in WT microglia, suggesting a threshold for ADP  
376 signaling that is reached in KO but not WT cells, and highlighting subtle differences in the Ca<sup>2+</sup>  
377 requirement for motility and process extension in TREM2 KO microglia.

378 To directly monitor Ca<sup>2+</sup> signaling and motility simultaneously in individual cells, we  
379 developed a novel iPSC-microglia cell-line expressing a genetically encoded, ratiometric Ca<sup>2+</sup>  
380 indicator Salsa6f, a GCaMP6f-tdTomato fusion protein. Because Salsa6f allows simultaneous  
381 measurement of Ca<sup>2+</sup> signal and tracking of processes, this Salsa6f iPSC line is likely to be a  
382 useful tool to dissect the relationship between Ca<sup>2+</sup> signaling and the function of various iPSC-  
383 derived human cell types including neurons, astrocytes, and microglia. In addition, this line may  
384 be readily xenotransplanted for use with human/microglia chimeric models to examine  
385 functional Ca<sup>2+</sup> responses to injury and pathology *in vivo*. Using Salsa6f-expressing microglia, we  
386 uncovered critical differences in how Ca<sup>2+</sup> levels tune motility in WT and TREM2 KO microglia.  
387 By tracking instantaneous velocity at the same time as Salsa6f Ca<sup>2+</sup> ratios in individual cells, we  
388 found that TREM2 KO cell motility showed a greater sensitivity to changes in cytosolic Ca<sup>2+</sup>  
389 levels with significantly higher speeds than WT cells at lower Ca<sup>2+</sup> and a more dramatic  
390 reduction in cell speed at high Ca<sup>2+</sup> levels. It is possible that high cytosolic Ca<sup>2+</sup> serves as a  
391 temporary STOP signal in microglia similar to its effects on T cells<sup>63</sup>; we further speculate that  
392 TREM2 KO cells may be more subject to this effect with ADP, given the higher expression of  
393 P2RY<sub>12</sub> and P2Y<sub>13</sub> receptors. Accordingly, reducing cytosolic Ca<sup>2+</sup>, resulted in increased mean  
394 speed, displacement, and straighter paths for TREM2 KO iPSC-microglia, but had no effect on

395 these motility metrics in WT cells suggesting that TREM2 KO cells may display a greater dynamic  
396 range in regulating their motility in response to sustained  $\text{Ca}^{2+}$  elevations. Consistent with this  
397 observation, chemotaxis in TREM2 KO cells was restored by partially inhibiting P2Y<sub>12</sub> receptors.  
398 In response to neurodegenerative disease, microglia down-regulate P2Y<sub>12</sub> receptors<sup>23,25,31</sup>.  
399 Active regulation of purinergic receptor expression is critical for sensing ADP gradients and  
400 decreasing motility near the chemotactic source. *In vivo* studies<sup>21,23,41</sup> suggest that TREM2 KO  
401 microglia are unable to down-regulate P2Y receptor expression upon activation, which may  
402 lead to the known chemotactic deficits in these cells.

403 The studies presented here provide evidence that reducing purinergic receptor activity  
404 may be clinically applicable in Alzheimer's patients with TREM2 loss of function mutations  
405<sup>40,55,69</sup>. Pharmacologically targeting P2Y<sub>12</sub> receptors to dampen both the  $\text{Ca}^{2+}$  dependent (PLC)  
406 and independent (DAG) arms of the GPCR signaling pathway may be useful to control microglial  
407 activation and motility. However, our results suggest that altering downstream  $\text{Ca}^{2+}$  flux may be  
408 sufficient, and thus, CRAC (Orai1) channel blockers that would specifically inhibit the sustained  
409  $\text{Ca}^{2+}$  signals without affecting the initial  $\text{Ca}^{2+}$  transient or the activation of DAG may provide a  
410 more targeted approach.

411 Currently, TREM2 activating antibodies are being examined in early stage clinical trials  
412 for Alzheimer's disease<sup>70,71</sup>, making it critically important to understand the broad  
413 consequences of TREM2 signaling. Therefore, an understanding of how TREM2 influences  
414 responses to purinergic signals and regulates cytosolic  $\text{Ca}^{2+}$  in human iPSC-microglia is critical.  
415 Beyond TREM2, we have found that protective variants in MS4A6A and PLCG2 gene expression

416 also decrease P2Y<sub>12</sub> and P2Y<sub>13</sub> receptor expression (unpublished data), suggesting this  
417 mechanism of microglial activation could be common across several microglial AD risk loci.

418 In summary, deletion of TREM2 renders iPSC-microglia highly sensitive to ADP, leading  
419 to prolonged Ca<sup>2+</sup> influx which increases cell displacement by decreasing cell turning. Despite  
420 this, TREM2 KO microglia show a defect in chemotaxis that is likely due to their inability to  
421 sense ADP gradients and make appropriate course corrections. Decreasing purinergic signaling  
422 in TREM2 KO microglia rescues directional chemotactic migration. We suggest that purinergic  
423 modulation or direct modulation of Ca<sup>2+</sup> signaling could provide novel therapeutic strategies in  
424 many AD patient populations, not solely those with reduced TREM2 function.

425

426

427 **Figure Legends**

428

429 **Figure 1: Microglia lacking TREM2 show exaggerated Ca<sup>2+</sup> responses to purinergic stimulation.**

430 (A) Representative red-green channel overlay images of WT (top) and TREM2 KO (bottom) iPSC-  
431 microglia loaded with Fluo-4 (green) and Fura-red (red) showing resting cytosolic Ca<sup>2+</sup> before  
432 ADP, and Ca<sup>2+</sup> levels 15 sec and 5 min after ADP addition. Scale bar= 20 μm. (B) Average traces  
433 (left panels) showing changes in cytosolic Ca<sup>2+</sup> in response to 2.5 μM ADP in 1 mM Ca<sup>2+</sup> buffer  
434 (n=39-44 cells). Baseline-subtracted peak Ca<sup>2+</sup> response and cytosolic Ca<sup>2+</sup> levels 5 min after  
435 ADP shown on the right (n=250-274 cells, 5 experiments, Mann-Whitney test). (C-D) Cytosolic  
436 Ca<sup>2+</sup> response to ADP as in A and B but in iPSC microglia expressing the GCaMP6f-tdTomato  
437 fusion Ca<sup>2+</sup> probe Salsa6f (n=41-53 cells, 2 independent experiments, Mann-Whitney test).  
438 Images in (C) are overlay of GCaMP6f (green) and tdTomato (red) channel images. Scale bar= 20  
439 μm. (E) Ca<sup>2+</sup> responses to 2.5 μM ATP in WT and TREM2 KO iPSC-microglia. Average traces (left  
440 panel, n=63-71 cells) and bar-graph summary of peak cytosolic Ca<sup>2+</sup> and Ca<sup>2+</sup> after 5 min (right  
441 panel, 165-179 cells, 3 experiments, Mann-Whitney test). (F) Ca<sup>2+</sup> responses to 10 μM UTP.  
442 Average traces (45-55 cells) and summary of peak cytosolic Ca<sup>2+</sup> and Ca<sup>2+</sup> after 5 min (175-269  
443 cells, 3 experiments, Mann-Whitney test). Data shown as mean ± SEM for traces and bar-  
444 graphs. *P* values indicated by \*\*\* for *P* < 0.001, \*\*\*\* for *P* < 0.0001.

445

446 **Figure 2: Higher sensitivity of TREM2 KO microglia to ADP is driven by increased purinergic**

447 **receptor expression.** (A) Schematic highlighting key downstream Ca<sup>2+</sup> signaling events triggered  
448 by ADP. Cytosolic Ca<sup>2+</sup> response to ADP is determined by functional expression and activity of  
449 P2Y<sub>12</sub> and P2Y<sub>13</sub> receptors, IP<sub>3</sub> receptors, ER-store Ca<sup>2+</sup> content, and store-operated Ca<sup>2+</sup> entry  
450 (SOCE) regulated by STIM and Orai proteins. (B) Representative images (left panel) showing  
451 overlay of Fluo-4 (green) and Fura-red (red) channels in WT (top) and TREM2 KO (bottom) iPSC-  
452 microglia before and peak Ca<sup>2+</sup> response after ADP addition in Ca<sup>2+</sup> free buffer. Scale bar= 20  
453 μm. Average trace showing Ca<sup>2+</sup> response to ADP in Ca<sup>2+</sup>-free buffer (middle panel, 64-83 cells).  
454 Quantification of peak signal (right panel, n=264-289 cells, 4 experiments, Mann-Whitney test).  
455 (C-E) Dose-response curves showing baseline-subtracted peak Ca<sup>2+</sup> responses to ADP in Ca<sup>2+</sup>-

456 free buffer (**C**), percent of “responding” cells (**D**) and peak  $\text{Ca}^{2+}$  responses only in “responding”  
457 cells (**E**). N= 84-474 WT cells and 70-468 TREM2 KO cells, 2-5 experiments. (**F**) RNA normalized  
458 read counts of P2Y<sub>12</sub> and P2Y<sub>13</sub> receptor expression from bulk RNA-sequencing of WT and  
459 TREM2 KO iPSC-microglia (n=4, adjusted *P-values* from DESeq2). (**G**) Representative histogram  
460 (left panel) showing PM expression of P2Y<sub>12</sub> receptor in WT and TREM2 KO microglia. Cells were  
461 stained with BV421 labelled anti-human P2Y<sub>12</sub> receptor antibody. Isotype control is shown as  
462 dashed line. Right panel shows summary of median fluorescence intensity (MFI) of P2Y<sub>12</sub>  
463 receptor-labelled cells (n= 10 samples each, Students t- test). (**H**)  $\text{Ca}^{2+}$  traces (left panel)  
464 showing response to 1  $\mu\text{M}$  ADP in  $\text{Ca}^{2+}$ -free buffer after 30 min pre-treatment with a  
465 combination of P2Y<sub>12</sub> receptor antagonist PSB 0739 (10  $\mu\text{M}$ ) and P2Y<sub>13</sub> receptor antagonist MRS  
466 2211 (10  $\mu\text{M}$ ). Summary of the peak  $\text{Ca}^{2+}$  response (right panel, n=40-79 cells, 2 experiments,  
467 Mann-Whitney test). Data are mean  $\pm$  SEM. *P values* indicated by \*\*\*\* for  $P < 0.0001$ .

468  
469 **Figure 3: Regulation of ADP-evoked SOCE in WT and TREM2 KO microglia.** (**A**) SOCE in WT  
470 microglia triggered with thapsigargin (TG, 2  $\mu\text{M}$ ) in  $\text{Ca}^{2+}$ -free buffer followed by re-addition of 1  
471 mM  $\text{Ca}^{2+}$  in the absence (control, grey trace) or presence (red trace) of the Orai channel  
472 inhibitor Synta66 (n=34-48 cells). Cells were pretreated with Synta66 (10  $\mu\text{M}$ ) for 30 min before  
473 imaging. Bar-graph summary of the rate of  $\text{Ca}^{2+}$  influx (n=80-137 cells, 2 experiments, Mann-  
474 Whitney test). (**B**) SOCE evoked by ADP (2.5  $\mu\text{M}$ ) in WT microglia (grey trace), using a similar  
475  $\text{Ca}^{2+}$  addback protocol as in **A**. Red trace shows effect of Synta66 on ADP-evoked SOCE. Right  
476 panel shows bar-graph summary of the rate of ADP-triggered  $\text{Ca}^{2+}$  influx after re-addition of 1  
477 mM  $\text{Ca}^{2+}$  (n=148-155 cells, 2 experiments, Mann-Whitney test). (**C**) Comparison of SOCE evoked  
478 with TG (2  $\mu\text{M}$ ) in WT and TREM2 KO cells (n=90-129 cells). Bar-graph summaries of ER store-  
479 release quantified as area under the curve, rate of SOCE, and peak SOCE (n=187-266 cells, 2  
480 experiments, Mann-Whitney test). (**D**) Traces showing ADP-evoked SOCE in WT and TREM2 KO  
481 microglia after depleting stores with 100 nM ADP in  $\text{Ca}^{2+}$  free buffer and re-addition of 1 mM  
482  $\text{Ca}^{2+}$  (left panel, n=97-114 cells). Comparison of ADP-evoked cytosolic  $\text{Ca}^{2+}$  peak, peak SOCE and  
483 SOCE rate (right panel, n=234-313 cells, 3 experiments, Mann-Whitney test). (**E**) Ionomycin-  
484 pulse experiment to measure residual ER  $\text{Ca}^{2+}$  pool in cells after initial treatment with ADP. WT



485 and TREM2 KO cells were pulsed sequentially with ADP first (200 nM) and subsequently treated  
486 with ionomycin (1  $\mu$ M) to empty and measure the residual pool of ER  $\text{Ca}^{2+}$ . Imaging was done  
487 entirely in  $\text{Ca}^{2+}$ -free buffer to prevent  $\text{Ca}^{2+}$  influx across the PM. Average trace (left panel), Peak  
488 ADP  $\text{Ca}^{2+}$  response (middle panel) and peak ionomycin-induced  $\text{Ca}^{2+}$  response (right panel)  
489 (n=38-60 cells, 3-4 experiments, Mann-Whitney test). **(F)** Average trace (left, 71-117 cells) and  
490 summary of ER store-release after 2  $\mu$ M ionomycin treatment in  $\text{Ca}^{2+}$  free buffer (right, 146-234  
491 cells, 2 experiments; **ns**, *non-significant*  $P > 0.05$ , Mann-Whitney test). **(G)** Same as H but in  
492 response to UV  $\text{IP}_3$  uncaging (167-200 cells, **ns**, *non-significant*  $P > 0.05$ , nonparametric t-test).  
493 Data shown as mean  $\pm$  SEM for traces and bar-graphs. Data are mean  $\pm$  SEM. *P values* indicated  
494 by **ns** for non-significant, \* for  $P < 0.05$  and \*\*\*\* for  $P < 0.0001$ .

495  
496 **Figure 4: Nondirectional ADP exposure increases WT microglial speed and process extension.**

497 **(A)** Average trace showing closure of scratch wound produced with IncuCyte S3 WoundMaker.  
498 iPSC-microglia imaged every 30 min after scratch wound with or without ADP stimulation (n=4  
499 wells; 2 images per well). **(B)** Representative image of WT iPSC-microglia motility 30 min after  
500 ADP exposure with cell tracks overlain (left). Pseudocolored images (center) across time: 0 min  
501 (red), 4 min (orange), 8 min (yellow), 12 min (green), 16 min (cyan), 20 min (blue), 24 min  
502 (purple), 28 min (magenta). Scale bar= 100  $\mu$ m. White boxes zoomed in at right to demonstrate  
503 motile (top) and non-motile (bottom) cells. **(C)** Representative color images (top left) and  
504 displacement vectors (bottom left) of WT iPSC-microglia at baseline (no ADP, grey) and 30 min  
505 after 2.5  $\mu$ M ADP treatment (red). Summary of Mean Speed ( $\mu$ m/min), Displacement over 10  
506 min ( $\mu$ m/10 min) and Track straightness (track length/track displacement) (414-602 cells, 2  
507 experiments). **(D)** Representative images, displacement vectors, and quantification of WT iPSC-  
508 microglia motility for 20 min following ADP addition. Cells were pre-treated with vehicle (grey),  
509 MRS 2211 (10  $\mu$ M, gold), or PBS 0739 (10  $\mu$ M, blue) (180-187 cells, 2 experiments). **(E)**  
510 Representative images, displacement vectors, and quantification of WT iPSC-microglia motility  
511 after ADP in 1 mM  $\text{Ca}^{2+}$  (light grey) or  $\text{Ca}^{2+}$ -free buffer (dark grey) (401-602 cells, 3  
512 experiments). **(F)** Representative images (left) and process extension (right) of iPSC-microglia  
513 (cytoplasmic GFP, grey) before or 30 min after ADP addition. Cells were pre-treated with vehicle

514 (grey), MRS 2211 (10  $\mu$ M, gold), or PBS 0739 (10  $\mu$ M, blue) (52-163 cells, 3-4 experiments). **(C-F)**  
515 One way ANOVA with Tukey post hoc test. Data shown as mean  $\pm$  SEM (A, F) and as violin plots  
516 with mean, 25<sup>th</sup> and 75<sup>th</sup> percentile (C-E). *P values* indicated by **ns** for non-significant, \* for  $P <$   
517  $0.05$ , \*\* for  $P < 0.01$ , \*\*\* for  $P < 0.001$  and \*\*\*\* for  $P < 0.0001$ .

518  
519 **Figure 5: ADP-driven process extension and cell displacement are increased in TREM2 KO**  
520 **iPSC-microglia.** **(A-E)** Motility of WT (grey) and TREM2 KO (green) iPSC-microglia over 20 min  
521 following ADP addition in 1 mM  $\text{Ca}^{2+}$ -containing buffer. **(A)** Plots of track displacement in  $\mu$ m  
522 centered from point of origin at (0,0). **(B)** Mean-squared displacement (MSD) vs time. Mean-cell  
523 track speeds **(C)**, total track displacement in 10-min interval **(D)**, and track straightness **(E)** for  
524 130-327 cells, 7 experiments, student's t-test. **(F-J)**. Same as **(A-F)** but in  $\text{Ca}^{2+}$ -free medium (125-  
525 279 cells, 2 experiments, student's t-test). **(K)** Representative images of GFP-expressing WT  
526 (top) and TREM2 KO (bottom) iPSC-microglia, before and 30 min after 2.5  $\mu$ M ADP addition. **(L)**  
527 Quantification of total number of branches per cell before and after ADP treatment (left) and  
528 paired dot-plots showing fold change in branch number from pre-ADP levels (right). Each data-  
529 point represents an imaging field in the paired-plots. **(M)** Total process length before and after  
530 ADP treatment displayed as raw values per cell (left) and as fold change from baseline  
531 conditions per imaging field (right). For **L** and **M**,  $n=151-158$  cells, WT; 133-167 cells, KO; 9-10  
532 imaging fields, 3-4 experiments. One-way ANOVA with multiple comparisons for single-cell  
533 data, two-tailed paired t-test for the paired-plots. Data shown as mean  $\pm$  SEM (B, G, L, M) and  
534 as violin plots with mean, 25<sup>th</sup> and 75<sup>th</sup> percentile (C- E, H-J). *P values* indicated by **ns** for non-  
535 significant, \* for  $P < 0.05$ , \*\* for  $P < 0.01$  and \*\*\*\* for  $P < 0.0001$ .

536  
537 **Figure 6: Cytosolic  $\text{Ca}^{2+}$  levels tune microglial motility in TREM2 KO cells.** **(A)** Schematic of  
538 traditional SOCE pathway with store-refilling (left) and protocol for sustaining cytoplasmic  $\text{Ca}^{2+}$   
539 to "low" and "high" levels with 0.2 and 2mM extracellular  $\text{Ca}^{2+}$  and using TG to inhibit store-  
540 refilling (right). **(B)** Average SOCE traces in WT Salsa6f iPSC-microglia showing changes in  
541 cytoplasmic  $\text{Ca}^{2+}$  after addition of either 0.2 or 2 mM extracellular  $\text{Ca}^{2+}$  ( $n=78-110$  cells). **(C)**  
542 Average change in cytoplasmic  $\text{Ca}^{2+}$  levels in WT and TREM2 KO microglia over 25 min after

543 SOCE activation. **(D)** Comparison of  $\text{Ca}^{2+}$  levels and microglia motility in WT (top) and TREM2 KO  
544 (bottom) microglia. Cytosolic  $\text{Ca}^{2+}$  levels indicated by instantaneous single-cell G/R Ratio (n=74-  
545 158 cells). Mean of instantaneous speeds, track displacement and track straightness calculated  
546 as before in Figures 3 and 4. Yellow (0.2 mM Ca, TG), green (2 mM Ca, TG). Students t-test \*\*\*\*  
547  $p < 0.0001$ ; \*\*  $p = 0.0062$ ; \*  $p = 0.432$ ; ns  $> 0.9999$ . **(E)** Correlation of instantaneous  $\text{Ca}^{2+}$  and  
548 instantaneous speed in WT and KO cells. Red line denotes 10  $\mu\text{m}/\text{sec}$  (cells above this threshold  
549 considered “fast-moving”). For WT:  $p < 0.0001$ ;  $r = -0.1316$ ; number pairs = 5850. For KO:  $p <$   
550  $0.0001$ ;  $r = -0.1433$ ; number pairs = 6063 (Spearman’s correlation). **(F)** Mean speed of cells  
551 binned by instantaneous G/R  $\text{Ca}^{2+}$  ratio (1-way ANOVA \*\*\*\*  $p < 0.0001$ ). Each data point is  
552 calculated for a bin increment of 0.5 G/R ratio. **(G)** Percentage of fast-moving cells quantified as  
553 a function of G/R  $\text{Ca}^{2+}$  ratio. X-axis G/R ratios binned in increments of 0.5 as in **F**. In **E-G**, n=78-  
554 100 cells. Data shown as mean  $\pm$  SEM (B, F) and as violin plots with mean, 25<sup>th</sup> and 75<sup>th</sup>  
555 percentile (D). *P values* indicated by ns for non-significant, \* for  $P < 0.05$ , \*\* for  $P < 0.01$  and  
556 \*\*\*\* for  $P < 0.0001$ .

557

558 **Figure 7: Migration deficits in TREM2 KO microglia are rescued by inhibition of purinergic**  
559 **signaling. (A)** Migration towards ADP in a two-chamber microfluidic device. Representative  
560 images of RFP expressing microglia that migrated into the central chamber 3 days after 100  
561 ng/mL ADP addition. Dotted circle delineates separation of inner and outer chamber. Scale bar  
562 = 500  $\mu\text{m}$ . Quantification of microglial migration (right panel). Migrated cell counts are  
563 normalized to WT cells treated with ADP (n=3-4 experiments; One-way ANOVA with multiple  
564 comparisons). **(B)** Baseline subtracted peak ratiometric  $\text{Ca}^{2+}$  signal in response to 2.5  $\mu\text{M}$  ADP in  
565 1 mM extracellular  $\text{Ca}^{2+}$ , and in the presence or absence of 10  $\mu\text{M}$  PSB 0739 (44 cells, WT; 39-43  
566 cells, KO; representative of 3 independent experiments; One-way ANOVA with multiple  
567 comparisons). **(C)** Two-chamber migration to 100 ng/mL ADP with or without 10  $\mu\text{M}$  PSB 0739.  
568 Values are normalized to WT cells with ADP (n=3-4 experiments; One-way ANOVA with multiple  
569 comparisons). Representative images shown on the left. Scale bar = 500  $\mu\text{m}$ . Data shown as  
570 mean  $\pm$  SEM. *P values* indicated by ns for non-significant, \* for  $P < 0.05$ , \*\* for  $P < 0.01$  and  
571 \*\*\*\* for  $P < 0.0001$ .

572

573 **Supplementary Figure Legends**

574

575 **Figure 1-figure supplement 1: Validation of Salsa6f transgenic iPSC-microglia.** (A)  
576 Representative bright field, green (GCaMP6f), red (tdTomato), and Green/Red channel overlay  
577 images of transgenic Salsa6f expressing iPSC-microglia at low (top row) and high (bottom row)  
578 cytosolic Ca<sup>2+</sup> levels. Cells were treated with 2 μM thapsigargin (TG) to deplete stores and  
579 evoke store-operated Ca<sup>2+</sup> entry (SOCE). Images are shown at the end of TG treatment for low  
580 Ca<sup>2+</sup> and at the peak of SOCE for high Ca<sup>2+</sup>. Scale bar = 20 μm. (B) Trace of average change in  
581 fluorescence intensity of tdTomato (red) and GCaMP6f (green) over time. [Summary of GCaMP6f](#)  
582 [and tdTomato intensities before and after invoking SOCE are shown on the right.](#) (C)  
583 Ratiometric GCaMP6f/ tdTomato signal (Green/ Red or G/R Ratio) over time calculated from  
584 (B). [Summary of G/R Ratio at low and high cytosolic Ca<sup>2+</sup>](#) (B-C, n=19 cells, Mann-Whitney test).  
585 (D) Immunofluorescence images showing staining for the microglia-specific marker IBA1 in  
586 either resting or activated WT or Salsa6f-transgenic iPSC-microglia (left). Right panel shows  
587 quantification of IBA1 protein expression (n=4 wells, 2 independent images per well, t-test).  
588 Cells were activated with 100 ng/mL LPS (lipopolysaccharide for 24 hours). (E) Microglia cell  
589 counts at final day of differentiation (n=3 wells, t-test). (F) Phagocytosis of synaptosomes in WT  
590 non-transgenic (open circle) and Salsa6f-expressing (closed circle) iPSC-microglia. Cytochalasin  
591 D (grey, 10 μM) used as negative control to inhibit phagocytosis. Live cultures imaged on  
592 IncuCyte S3 (n=4 wells; 4 images per well). (G) Phagocytic load at 24 hr for synaptosomes, beta-  
593 amyloid, zymosan A, and *S. aureus* (n=4 wells; 4 images per well; one way ANOVA with Tukey  
594 post-hoc test). Data shown as mean ± SEM for traces and bar-graphs. *P* values indicated by ns  
595 for non-significant, \*\*\*\* for *P* < 0.0001.

596

597 **Figure 1-figure supplement 2: Comparison of cytosolic Ca<sup>2+</sup> signal over time triggered by**  
598 **various purinergic agonists.** (A) Representative trace showing changes in cytosolic Ca<sup>2+</sup> in a  
599 single cell to illustrate the scheme for measuring cytosolic Ca<sup>2+</sup> level 5 min after agonist  
600 application. (B) Bar-graph summary of cytosolic Ca<sup>2+</sup> levels in WT and TREM2 KO iPSC-microglia  
601 5 min after application of 2.5 μM ADP (blue), 2.5 μM ATP (red), and 10 μM UTP (yellow).

602 N=165-274 cells pooled from 2-3 experiments. One-way ANOVA with multiple comparisons.  
603 Data shown as mean  $\pm$  SEM for the bar-graph. *P* values indicated by \*\*\*\* for  $P < 0.0001$ .

604

605 **Figure 2-figure supplement 1: Role of P2Y<sub>12</sub> and P2Y<sub>13</sub> receptors in ADP-mediated**  
606 **augmentation of store-release in TREM2 KO microglia. (A)** Representative green (GCaMP6f)  
607 and red (tdTomato) channel overlay images of WT (top) and TREM2 KO (bottom) iPSC-microglia  
608 before and peak Ca<sup>2+</sup> response after ADP addition in Ca<sup>2+</sup>-free buffer. Scale bar = 20  $\mu$ m. **(B)**  
609 Average trace (left panel) showing Ca<sup>2+</sup> response to 100 nM ADP in Ca<sup>2+</sup>-free buffer.  
610 Quantification of peak signal (right panel, n=46-75 cells, 2 experiments, Mann-Whitney test). **(C)**  
611 Comparison of peak cytosolic Ca<sup>2+</sup> in response to ADP (2.5  $\mu$ M ADP) in 1 mM Ca<sup>2+</sup> or Ca<sup>2+</sup>-free  
612 buffer (n=38-96 cells, ordinary one-way ANOVA with multiple comparisons). **(D)** Volcano plot of  
613 differentially expressed genes from bulk RNA-sequencing of WT and TREM2 KO iPSC-microglia  
614 (n=4). Genes for IP3R, STIM1, and ORAI1 are highlighted. **(E)** RNA normalized read counts for IP<sub>3</sub>  
615 receptor type 2 (ITPR2), PMCA1 (ATP2B1), SERCA2 (ATP2A2), SERCA3 (ATP2A3), STIM1, and  
616 ORAI1 in WT and TREM2 KO iPSC-microglia. Isoforms expressed lower than 10 reads in any  
617 sample are not considered expressed and are not shown. Relative expression of P2Y<sub>12</sub> and P2Y<sub>13</sub>  
618 receptors are shown for comparison of the relative fold-change between WT and TREM2 KO  
619 cells. **(F-G)** Peak Ca<sup>2+</sup> response in Ca<sup>2+</sup> free buffer after treatment with 1 or 10  $\mu$ M ADP in the  
620 presence of P2Y<sub>12</sub> receptor antagonist PSB 0739 **(F)** or P2Y<sub>13</sub> receptor antagonist MRS 2211 **(G)**,  
621 respectively. Cells were pretreated with 10  $\mu$ M of PSB 0739 or 10  $\mu$ M MRS 2211 for 30 min  
622 before imaging. (72-128 cells, **F**; 83-117 cells, **G**; representative of 3 experiments, Mann-  
623 Whitney Test). Data shown as mean  $\pm$  SEM for traces and bar-graphs. Data shown as mean  $\pm$   
624 SEM for traces and bar-graphs. *P* values indicated by ns for non-significant, \*\* for  $P < 0.01$ , \*\*\*  
625 for  $P < 0.001$ , \*\*\*\* for  $P < 0.0001$ .

626

627 **Figure 3-figure supplement 1: Regulation of SOCE in iPSC-microglia. (A)** Average trace showing  
628 SOCE triggered in TREM2 KO microglia via emptying ER Ca<sup>2+</sup> stores with thapsigargin (TG, 2  $\mu$ M)  
629 in Ca<sup>2+</sup>-free buffer followed by re-addition of 1 mM Ca<sup>2+</sup> in the absence (control, green trace) or  
630 presence (red trace) of the Orai channel inhibitor Synta66. Cells were pretreated with Synta66

631 (10  $\mu\text{M}$ ) for 30 min before experiment. Bar-graph summary of the rate of  $\text{Ca}^{2+}$  influx after re-  
632 addition of 1 mM  $\text{Ca}^{2+}$  (80-126 cells, Mann-Whitney test). (B) SOCE evoked by ADP (2.5  $\mu\text{M}$ ) in  
633 TREM2 KO microglia (green trace), using a similar  $\text{Ca}^{2+}$  addback protocol. Red trace shows effect  
634 of Synta66 on ADP-evoked SOCE. Right panel summarizes the rate of ADP-triggered  $\text{Ca}^{2+}$  influx  
635 after re-addition of 1 mM  $\text{Ca}^{2+}$  ( $n= 125- 154$  cells, 2 experiments, Mann-Whitney test). (C-D)  
636 Cytosolic  $\text{Ca}^{2+}$  response to ADP in TREM2 KO iPSC-microglia pre-treated with 2-APB (50  $\mu\text{M}$ ) or  
637  $\text{Gd}^{3+}$  (5  $\mu\text{M}$ ) to block store-operated  $\text{Ca}^{2+}$  entry (SOCE). Average traces (C), baseline- subtracted  
638 initial peak  $\text{Ca}^{2+}$  responses to ADP (D, left panel), and baseline-subtracted  $\text{Ca}^{2+}$  after 5 min of  
639 ADP addition (D, right panel) are shown ( $n= 41-74$  cells, ordinary one-way ANOVA with multiple  
640 comparisons). (E-F) Role of Orai1 in TG- and ADP-evoked SOCE in iPSC-microglia. (E) Comparison  
641 of TG-evoked SOCE in WT and Orai1 KO cell showing average traces (left panel) and summary of  
642 SOCE rate (right panel;  $n= 42-54$  cells, 3-4 experiments, Mann-Whitney test). (F) ADP-evoked  
643 SOCE in WT and Orai1 KO showing average traces (left panel) and summary of SOCE rate (right  
644 panel;  $n= 42-53$  cells, 3-4 experiments, Mann-Whitney test). Data shown as mean  $\pm$  SEM for  
645 traces and bar-graphs. *P* values indicated by **ns** for non-significant, \*\*\*\* for  $P < 0.0001$ .

646

647 **Figure 3-figure supplement 2: ADP depletes ER  $\text{Ca}^{2+}$  stores to a greater extent in TREM2 KO**  
648 **microglia.** (A) TG-pulse experiment to measure residual ER  $\text{Ca}^{2+}$  pool in cells after initial  
649 treatment with ADP (1  $\mu\text{M}$ ) and subsequent treatment with thapsigargin (2  $\mu\text{M}$ ). Imaging was  
650 done in  $\text{Ca}^{2+}$ -free buffer to prevent  $\text{Ca}^{2+}$  influx across the PM. Average trace (left panel), Peak  
651 ADP  $\text{Ca}^{2+}$  response (middle panel) and extent of TG-induced ER store-release measured as area  
652 under curve (AUC, right panel) ( $n=81-108$  cells, Mann-Whitney test). (B) Control experiment  
653 comparing the ER- $\text{Ca}^{2+}$  pool in WT and TREM2 KO microglia after store-depletion with TG, and  
654 without any pretreatment with ADP ( $n=29- 63$  cells, Mann-Whitney test). (C-D) Relationship  
655 between ADP-induced store-release and SOCE in iPSC-microglia. (C) Representative single-cell  
656 trace of  $\text{Ca}^{2+}$  signal in response to ADP in 1 mM extracellular  $\text{Ca}^{2+}$  buffer showing the scheme  
657 for measuring ER store-release as the initial  $\text{Ca}^{2+}$  peak and SOCE as cytosolic  $\text{Ca}^{2+}$  level 5 min  
658 after ADP application. (D) Scatter-plot showing correlation of initial ADP-induced  $\text{Ca}^{2+}$  response  
659 (store-release) and cytoplasmic  $\text{Ca}^{2+}$  after 5 min (SOCE) in WT (grey) and KO (green) cells

660 (n=866-935 cells from multiple imaging runs with a range of ADP doses; in  $\mu\text{M}$ : 0.001, 0.1, 0.5,  
661 1, 2, 2.5, 5, 10. Comparison of slopes between WT and TREM2 KO:  $P = 0.7631$ ; Extra sum of  
662 squares F test). (E-F) Comparison of cytosolic  $\text{Ca}^{2+}$  clearance indicative of PMCA pump activity in  
663 WT and TREM2 KO microglia. SOCE was invoked and rate of  $\text{Ca}^{2+}$  decline was measured after  
664 addition of 0 mM  $\text{Ca}^{2+}$ . (E) Average trace showing invoking SOCE with 2  $\mu\text{M}$  TG (left panel).  
665 Right panel shows the drop in cytosolic  $\text{Ca}^{2+}$  following addition of  $\text{Ca}^{2+}$  free solution as  
666 highlighted (pink) in the SOCE trace (F) Summary of rate of  $\text{Ca}^{2+}$  decline after addition of 0 mM  
667  $\text{Ca}^{2+}$  (n= 8 imaging fields, 142-175 total cells, Mann-Whitney Test). Data shown as mean  $\pm$  SEM  
668 for traces and bar-graphs.  $P$  values indicated by ns for non-significant, \*\* for  $P < 0.01$ .

669  
670 **Figure 4-figure supplement 1: ADP-mediated process extension in WT iPSC-microglia. (A)**  
671 Representative images of a cell (Cell 1) from a time-lapse experiment showing increased  
672 branching and extension of processes in GFP-expressing WT iPSC-microglia, at times indicated  
673 following addition of 2.5  $\mu\text{M}$  ADP. Bright field DIC images (top row) and GFP images (bottom  
674 row) are shown. (B) Another example of a cell (Cell 2) showing process extension in the same  
675 imaging field. (C) A motile cell (Cell 3) in the same imaging field is shown for comparison. Note  
676 the lack of displacement in cells that extend their process, and lack of significant process  
677 extension in a highly motile cell. Scale bar: 15  $\mu\text{M}$ .

678  
679 **Figure 5-figure supplement 1: Motility analysis in WT and TREM2 KO iPSC-microglia. (A)**  
680 Summary of microglial mean speeds, displacement over 10 min, and track straightness in open-  
681 field migration in the absence of any purinergic stimulation (student's t-test). (B) Flower plots  
682 show similar displacement from origin for WT (left) and TREM2 KO (right) cells. (C) Directional  
683 Autocorrelation calculated via DiPer excel macro. Due to lack of directional gradient, directional  
684 autocorrelation of motility vectors is expected to drop quickly. Time constants for best-fit single  
685 exponential curves are indicated, consistent with increased straightness for TREM2 KO cells  
686 treated with ADP. (D) Directional autocorrelation of WT (grey) and TREM2 KO (green) iPSC-  
687 microglia at baseline (open circles) or after ADP addition (filled circles). Mean autocorrelation  
688 values in the first 5 min (left panel, one-way ANOVA) and time (min) until autocorrelation

689 reaches zero (right panel). Data shown as mean  $\pm$  SEM for the bar-graph in (D), and as violin  
690 plots with mean, 25<sup>th</sup> and 75<sup>th</sup> percentile in (A). *P* values indicated by ns for non-significant, \*  
691 for  $P < 0.05$ , and \*\*\*\* for  $P < 0.0001$ .

692

693 **Figure 5-figure supplement 2: Comparison of process extension in WT and TREM2 KO**  
694 **Microglia.** Branching and process extension in WT and TREM2 KO iPSC-microglia 30 min after  
695 addition of ADP in 1 mM (A, B) or 0 mM extracellular Ca<sup>2+</sup> buffer (C, D). (A) Data displayed as  
696 paired-plots showing average branch number per cell in an imaging field (top row) and  
697 normalized to pre-ADP values for each imaging field (middle row). Bottom row shows fold  
698 change in branching after ADP treatment for WT (grey) and KO (green) iPSC-microglia. (B)  
699 Changes in process length in the same dataset as A. n=151-158 cells, WT; 133-167 cells, KO; 9-  
700 10 imaging fields, 3-4 experiments. (C, D) Same analysis as A, B but with ADP in Ca<sup>2+</sup> free buffer.  
701 n=137-143 cells, 8 imaging fields, 2-3 experiments. (A-D) p-values calculated by two-tailed  
702 paired Students t-test for the paired-plots, and by unpaired t-test when comparing fold-change  
703 in WT and KO cells. Data shown as paired plots and as mean  $\pm$  SEM for the bar-graphs. *P* values  
704 indicated by ns for non-significant, \* for  $P < 0.05$ , \*\* for  $P < 0.01$ , \*\*\* for  $P < 0.001$  and \*\*\*\* for  
705  $P < 0.0001$ .

706

707

708 **Figure 6-figure supplement 1: Tracking cell motility and cytosolic Ca<sup>2+</sup> using Salsa6f-expressing**  
709 **iPSC cell-line.** (A) Average change in single cell fluorescence intensity of tdTomato (red trace)  
710 and GCaMP6f (green trace) (left Y-axis) in WT Salsa6f microglia over 5 min following ADP  
711 treatment, overlaid with corresponding change in cell displacement over time (black trace, right  
712 Y-axis) (n=52-79 cells). (B) Same as (A) but for cells tracked over a period of 30 min. Data shown  
713 as mean  $\pm$  SEM for average traces.

714

715 **Figure 6-figure supplement 2: Motility analysis with varying Ca<sup>2+</sup>.** (A) Salsa6f Ca<sup>2+</sup> ratios and  
716 microglia motility in WT (top) and KO (bottom) microglia, with ADP added: yellow (0.2 mM Ca<sup>2+</sup>,  
717 TG + ADP), green (2 mM Ca<sup>2+</sup>, TG + ADP). Cytosolic Ca<sup>2+</sup> levels indicated by instantaneous single-



718 cell G/R Ratio. Mean of instantaneous speeds, 10 min track displacement and track straightness  
719 calculated as before. Students t-test \*\*\*\* p < 0.0001; \*\*\* p = 0.0001. n=164-393 cells. **(B, C)**  
720 Ca<sup>2+</sup> dependence of track displacement length in 0.2 mM Ca<sup>2+</sup> in WT cells **(B)** and TREM2 KO  
721 cells **(C)**. Correlation between instantaneous Ca<sup>2+</sup> and frame-to-frame displacement (left  
722 panels). Each dot represents an individual cell for an individual frame. Dotted red line  
723 represents displacement of 200 μm<sup>2</sup>. Mean square of frame-to-frame displacement of cells  
724 binned by instantaneous G/R Ca<sup>2+</sup> ratio (middle panels, 1-way ANOVA \*\*\*\* p < 0.0001). Each  
725 data point is calculated for a bin increment of 0.5 G/R ratio. Summary of cells with frame-to-  
726 frame square displacement > 200 μm<sup>2</sup> (right panels). WT cells **(B)** displace less than KO cells **(C)**.  
727 For each cell type, larger displacements are correlated with lower G/R Ca<sup>2+</sup> ratios. Cells which  
728 maintain elevated cytoplasmic Ca<sup>2+</sup> do not displace as far. For WT: p < 0.0001; r = -0.4778;  
729 number pairs = 5973. For KO: p < 0.0001; r = -0.3699; number pairs = 5761 (Spearman's  
730 correlation). Data shown as mean ± SEM for bar-graphs (B, C) and as violin plots with mean, 25<sup>th</sup>  
731 and 75<sup>th</sup> percentile (A). *P values* indicated by **ns** for non-significant, \*\*\* for *P* < 0.001 and \*\*\*\*  
732 for *P* < 0.0001.

733  
734 **Figure 7-figure supplement 1: TREM2 WT and KO close scratch wound at similar rates.** Scratch  
735 closure over 24 hours in WT (grey) and TREM2 KO (green) iPSC-microglia with (filled symbols) or  
736 without (empty symbols) pre-stimulation of iPSC-microglia with ADP (10 μM, 30 min). N=2  
737 wells, 2 images per well. Data shown as mean ± SEM.

738

739

740

741 **Materials and Methods**

742 **Key Resources Table**

| Reagent type (species) or resource | Designation                                | Source or reference               | Identifiers             | Additional Information                                                                       |
|------------------------------------|--------------------------------------------|-----------------------------------|-------------------------|----------------------------------------------------------------------------------------------|
| Cell line (Human)                  | WT iPSC-microglia                          | UCI ADRC iPSC Core                | ADRC5                   | iPSC-derived microglial line                                                                 |
| Cell line (Human)                  | TREM2 KO iPSC microglia                    | Blurton-Jones lab                 | ADRC5 Clone 28-18       | CRISPR-mediated knockout of TREM2 on the WT iPSC line                                        |
| Cell line (Human)                  | WT GFP-expressing iPSC-microglia           | Coriell                           | AICS-0036               | iPSC-line with GFP tagged to $\alpha$ tubulin. Originally developed by Dr. Bruce Conklin     |
| Cell line (Human)                  | TREM2 KO GFP-expressing iPSC-microglia     | Blurton-Jones lab                 | GFP Clone 1             | CRISPR-mediated knockout of TREM2 on the WT GFP <sup>+</sup> iPSC line                       |
| Cell line (Human)                  | WT RFP-expressing iPSC-microglia           | Coriell                           | AICS-0031-035           | iPSC-line with RFP tagged to $\alpha$ tubulin. Originally developed by Dr. Bruce Conklin     |
| Cell line (Human)                  | TREM2 KO RFP-expressing iPSC-microglia     | Blurton-Jones lab                 | RFP Clone 6             | CRISPR-mediated knockout of TREM2 on the WT RFP <sup>+</sup> iPSC line                       |
| Cell line (Human)                  | WT Salsa6f-expressing iPSC-microglia       | UCI ADRC iPSC Core                | ADRC76 Clone 8          | iPSC-line expressing a GCaMP6f-tdTomato fusion construct (Salsa6f)                           |
| Cell line (Human)                  | TREM2 KO Salsa6f-expressing iPSC microglia | Blurton-Jones lab                 | ADRC76 Clone 8 Clone 98 | CRISPR-mediated knockout of TREM2 on the WT Salsa6f <sup>+</sup> iPSC line                   |
| Cell line (Human)                  | <a href="#">Orai1 KO iPSC microglia</a>    | <a href="#">Blurton-Jones lab</a> | <a href="#">ADRC76</a>  | <a href="#">CRISPR-mediated knockout of Orai1 on the WT ADRC76 iPSC line</a>                 |
| Plasmid Construct (transgene)      | Salsa6f                                    | Addgene                           | Plasmid# 140188         | A genetically encoded Calcium Indicator with tdTomato linked to GCaMP6f by a V5 epitope tag. |
| Other                              | DMEM/F12, HEPES, no Phenol red             | Thermo Fisher Scientific          | 11038021                | Microglia differentiation cell culture medium                                                |
| Other                              | TeSR™-E8™                                  | STEMCELL Technologies             | 05990                   | Stem cell culture medium                                                                     |
| Other                              | StemDiff Hematopoietic kit                 | STEMCELL Technologies             | 05310                   |                                                                                              |

|                                            |                                            |                             |          |                                                                 |
|--------------------------------------------|--------------------------------------------|-----------------------------|----------|-----------------------------------------------------------------|
| Peptide/<br>Recombinant<br>protein         | Non-essential<br>amino acids               | Gibco                       | 11140035 |                                                                 |
| Peptide/<br>Recombinant<br>protein         | Glutamax                                   | Gibco                       | 35050061 |                                                                 |
| Peptide/<br>Recombinant<br>protein (human) | Insulin                                    | Sigma                       | I2643    |                                                                 |
| Peptide/<br>Recombinant<br>protein         | B27                                        | Gibco                       | 17504044 |                                                                 |
| Peptide/<br>Recombinant<br>protein         | N2                                         | Gibco                       | A1370701 |                                                                 |
| Peptide/<br>Recombinant<br>protein         | Insulin-<br>transferrin-<br>selenite       | Gibco                       | 41400045 |                                                                 |
| Peptide/<br>Recombinant<br>protein (human) | IL-34                                      | Peptidech                   | 200-34   |                                                                 |
| Peptide/<br>Recombinant<br>protein (human) | TGFβ1                                      | Peptidech                   | 100-21   |                                                                 |
| Peptide/<br>Recombinant<br>protein (human) | M-CSF                                      | Peptidech                   | 300-25   |                                                                 |
| Peptide/<br>Recombinant<br>protein         | CX3CL1                                     | Peptidech                   | 300-31   |                                                                 |
| Peptide/<br>Recombinant<br>protein         | CD200                                      | Novoprotein                 | C311     |                                                                 |
| Peptide/<br>Recombinant<br>protein         | Fibronectin                                | STEMCELL<br>Technologies    | 07159    |                                                                 |
| Other                                      | Matrigel                                   | Corning                     | 356231   |                                                                 |
| Other                                      | ReLeSR                                     | STEMCELL<br>Technologies    | 5872     | Human pluripotent stem<br>cell selection and passing<br>reagent |
| Other                                      | Goat Serum                                 | Thermo Fisher<br>Scientific | 10000C   |                                                                 |
| Other                                      | fluorescent beta-<br>amyloid 1-42<br>(647) | Anaspec                     | AS64161  |                                                                 |
| Other                                      | pHrodo tagged<br>zymosan A beads           | Thermo Fisher<br>Scientific | P35364   |                                                                 |

|                         |                                       |                               |                              |                                        |
|-------------------------|---------------------------------------|-------------------------------|------------------------------|----------------------------------------|
| Other                   | pHrodo tagged S. Aureus               | Thermo Fisher Scientific      | A10010                       |                                        |
| Other                   | Human Stem Cell Nucleofector kit 2    | Lonza                         | VPH-5022                     |                                        |
| Other                   | Alt-R CRISPR-Cas9 tracrRNA            | IDTDNA                        | 107253                       |                                        |
| Other                   | Alt-R HiFi Cas9 Nuclease              | IDTDNA                        | 1081061                      |                                        |
| Antibody                | Anti-human IBA1                       | Wako                          | 019-19741                    |                                        |
| Antibody                | Goat anti-rabbit 555                  | Thermo Fisher Scientific      | A21429                       | Secondary antibody                     |
| Other                   | Human TruStain FcX                    | Biolegend                     | <a href="#">Cat # 422301</a> | Fc Blocking Solution                   |
| Antibody                | Brilliant Violet 421 antihuman P2RY12 | Biolegend                     | clone 16001E                 | Primary antibody                       |
| Antibody                | Brilliant Violet 421 mouse IgG2a      | Biolegend                     | Clone MOPC-173               | $\kappa$ Isotype control               |
| Chemical compound, drug | Fluo-4 AM                             | Thermo Fisher Scientific      | F14201                       |                                        |
| Chemical compound, drug | Fura-red AM                           | Thermo Fisher Scientific      | F3021                        |                                        |
| Chemical compound, drug | Pluronic F-127                        | Thermo Fisher Scientific      | P3000MP                      |                                        |
| Chemical compound, drug | Cal-520 AM                            | AAT Bioquest                  | 21130                        |                                        |
| Chemical compound, drug | Cal-590 AM                            | AAT Bioquest                  | 20510                        |                                        |
| Chemical compound, drug | ci-IP3/PM                             | SiChem                        | 6210                         | Caged-inositol triphosphate analog     |
| Chemical compound, drug | Hoeschst                              | Thermo Fisher Scientific      | R37165                       |                                        |
| Chemical compound, drug | ADP                                   | Sigma-Aldrich                 | A2754                        |                                        |
| Chemical compound, drug | ATP                                   | Sigma-Aldrich                 | A9187                        |                                        |
| Chemical compound, drug | UTP                                   | Sigma-Aldrich                 | U1006                        |                                        |
| Chemical compound, drug | PSB 0739                              | Tocris                        | 3983                         |                                        |
| Chemical compound, drug | MRS 2211                              | Tocris                        | 2402                         |                                        |
| Chemical compound, drug | <a href="#">Synta66</a>               | <a href="#">Sigma-Aldrich</a> | <a href="#">SML1949</a>      | <a href="#">Orai channel inhibitor</a> |
| Chemical compound, drug | 2-APB                                 | Sigma-Aldrich                 | D9754                        |                                        |
| Chemical                | Gadolinium                            | Sigma-Aldrich                 | G7532                        |                                        |

|                         |                                          |                       |                |                                                                                                                |
|-------------------------|------------------------------------------|-----------------------|----------------|----------------------------------------------------------------------------------------------------------------|
| compound, drug          |                                          |                       |                |                                                                                                                |
| Chemical compound, drug | EGTA                                     | Sigma-Aldrich         | E8145          |                                                                                                                |
| Chemical compound, drug | 1-thioglycerol                           | Sigma-Aldrich         | M6145          |                                                                                                                |
| Chemical compound, drug | CloneR                                   | STEMCELL Technologies | 05888          | Defined supplement for single-cell cloning of human iPS cells                                                  |
| Chemical compound, drug | Thiazovivin                              | STEMCELL Technologies | 72252          | ROCK inhibitor                                                                                                 |
| Other                   | 35mm glass-bottom dish                   | MatTek                | P35G-1.5-14-C  | 1.5 coverslip, 14mm glass diameter                                                                             |
| Other                   | Incubation perfusion Lid for 35mm dishes | Tokai Hit             | LV200-D35FME   | Perfusion lid with inlet and outlet                                                                            |
| Other                   | Laser Scanning Confocal Microscope       | Olympus               | FV3000         | Equipped with Resonant Scanner, IX3-ZDC2 Z-drift compensator, 40x silicone oil objective, 20x air objective    |
| Other                   | Stage Top Incubation System              | Tokai Hit             | STXG           | Temperature and humidity control for FV3000 microscope stage                                                   |
| Other                   | Nikon Eclipse Ti microscope system       | Nikon                 |                | Equipped with a 40x oil immersion objective (N.A.: 1.3; Nikon) and an Orca Flash 4.0LT CMOS camera (Hamamatsu) |
| Other                   | Chemotaxis Assay Chamber                 | Hansang Cho Lab       |                |                                                                                                                |
| Other                   | IncuCyte S3 Live-Cell Analysis System    | Sartorius             |                |                                                                                                                |
| Other                   | Essen Incucyte WoundMaker                | Sartorius             | 4493           |                                                                                                                |
| Software, algorithm     | GraphPad Prism 9.1.0                     |                       |                | Data analysis, statistical analysis                                                                            |
| Software, algorithm     | Fiji (Image J)                           |                       |                | Image analysis                                                                                                 |
| Software, algorithm     | Incucyte 2020C                           |                       |                | Image acquisition and analysis                                                                                 |
| Software, algorithm     | IMARIS 9.7.0                             |                       |                | Cell tracking and image analysis                                                                               |
| Software, algorithm     | Flika                                    |                       |                | Image analysis                                                                                                 |
| Software, algorithm     | DiPer Excel Macros                       |                       | PMID: 25033209 | Data analysis, directional persistence                                                                         |

|  |  |  |  |  |
|--|--|--|--|--|
|  |  |  |  |  |
|  |  |  |  |  |

743

744 **Generation of iPSCs from human fibroblasts:** Human induced pluripotent stem cell lines were  
745 generated by the University of California, Irvine Alzheimer’s Disease Research Center (UCI  
746 ADRC) Induced Pluripotent Stem Cell Core from subject fibroblasts under approved Institutional  
747 Review Boards (IRB) and human Stem Cell Research Oversight (hSCRO) committee protocols.  
748 Informed consent was received from all participants who donated fibroblasts. Reprogramming  
749 was performed with non-integrating sendai virus in order to avoid integration effects. To  
750 validate new iPSC lines, cells were karyotyped by G-banding and tested for sterility.  
751 Pluripotency was verified by Pluritest Array Analysis and trilineage in vitro differentiation.  
752 Additional GFP- and RFP- $\alpha$ tubulin expressing iPSC lines (AICS-0036 and AICS-0031-035) were  
753 purchased from Coriell and originally generated by Dr. Bruce Conklin. iPSCs were grown  
754 antibiotic free on Matrigel (Corning) in complete mTeSR1 or TeSR-E8 medium (STEMCELL  
755 Technologies) in a humidified incubator (5% CO<sub>2</sub>, 37° C). All lines will be available upon request  
756 to the corresponding author.

757 **CRISPR-mediated knockout of TREM2 and ORAI1:** Genome editing to delete TREM2 was  
758 performed as in McQuade et al. 2020<sup>41</sup>. Briefly, iPSCs were nucleofected with  
759 Ribonucleoprotein complex targeting the second exon of TREM2 and allowed to recover  
760 overnight. Transfected cells were dissociated with pre-warmed Accutase then mechanically  
761 plated to 96-well plates for clonal expansion. Genomic DNA from each colony was amplified  
762 and sequenced at the cut site. The amplification from promising clones was transformed via  
763 TOPO cloning for allelic sequencing. Knockout of TREM2 was validated by western blotting

764 (AF1828, R&D) and HTRF (Cisbio)<sup>41</sup>. A similar strategy was used to delete ORAI1 using an RNP  
765 complex of Cas9 protein coupled with a guide RNA (5' CGCTGACCACGACTACCCAC)  
766 targeting the second exon of ORAI1. All iPSC lines were confirmed to be sterile and exhibiting a  
767 normal Karyotype via Microarray-based Comparative Genomic Hybridization (aCGH, Cell Line  
768 Genetics).

769 **iPSC-microglia differentiation:** iPSC-microglia were generated as described in<sup>50,51</sup>. Briefly, iPSCs  
770 were directed down a hematopoietic lineage using the STEMdiff Hematopoiesis kit (STEMCELL  
771 Technologies). After 10-12 days in culture, CD43+ hematopoietic progenitor cells are transferred  
772 into a microglia differentiation medium containing DMEM/F12, 2× insulin-transferrin-selenite,  
773 2× B27, 0.5× N2, 1× Glutamax, 1× non-essential amino acids, 400 μM monothioglycerol, and  
774 5 μg/mL human insulin. Media was added to cultures every other day and supplemented with  
775 100 ng/mL IL-34, 50 ng/mL TGF-β1, and 25 ng/mL M-CSF (Peprotech) for 28 days. In the final 3  
776 days of differentiation 100 ng/mL CD200 (Novoprotein) and 100 ng/mL CX3CL1 (Peprotech)  
777 were added to culture.

778 **Confocal Laser Scanning Microscopy:** Unless otherwise stated, cells were imaged on an  
779 Olympus FV3000 confocal laser scanning inverted microscope equipped with high-speed  
780 resonance scanner, IX3-ZDC2 Z-drift compensator, 40x silicone oil objective (NA 1.25) and a  
781 Tokai-HIT stage top incubation chamber (STXG) to maintain cells at 37°C. To visualize Salsa6f,  
782 488 nm and 561 nm diode lasers were used for sequential excitation of GCaMP6f (0.3% laser  
783 power, 450V channel voltage, 494-544nm detector width) and TdTomato (0.05% laser power,  
784 450V channel voltage, 580-680nm detector width), respectively. Fluo-4 and Fura-red were both  
785 excited using a 488 nm diode laser (0.07% laser power, 500V channel voltage, 494-544nm

786 detector width for Fluo-4; 0.07% laser power, 550V channel voltage, 580-680nm detector for  
787 Fura-Red). Two high-sensitivity cooled GaAsP PMTs were used for detection in the green and  
788 red channels respectively. GFP was excited using the same settings as GCaMP6f. Other image  
789 acquisition parameters unique to Ca<sup>2+</sup> imaging, microglia process and cell motility analysis are  
790 indicated in the respective sections.

#### 791 **Measurement of intracellular Ca<sup>2+</sup>:**

792 *Cell preparation:* iPSC-microglia were plated on fibronectin-coated (5 µg/mL) glass-bottom 35  
793 mm dishes (MatTek, P35G-1.5-14-C) overnight at 60 % confluence. Ratiometric Ca<sup>2+</sup> imaging  
794 was done using Fluo-4 AM and Fura-Red AM dyes as described previously<sup>41</sup>. Briefly, cells were  
795 loaded in microglia differentiation medium with 3 µM Fluo-4 AM and 3 µM Fura-Red AM  
796 (Molecular Probes) in the presence of Pluronic Acid F-127 (Molecular Probes) for 30 min at  
797 room temperature (RT). Cells were washed with medium to remove excess dye and 1 mM Ca<sup>2+</sup>  
798 Ringer's solution was added to the 35 mm dish before being mounted on the microscope for  
799 live cell imaging. We note that iPSC-microglia are sensitive to shear forces and produce brief  
800 Ca<sup>2+</sup> signals in response to solution exchange that are dependent on extracellular Ca<sup>2+</sup>, and that  
801 these are more prominent at 37° C. To minimize these confounding effects, cells were imaged  
802 at RT and perfusion was performed gently. Salsa6f-expressing iPSC-microglia were prepared for  
803 Ca<sup>2+</sup> imaging in the same way as conventional microglia, but without the dye loading steps. The  
804 following buffers were used for Ca<sup>2+</sup> imaging: (1) 1 or 2 mM Ca<sup>2+</sup> Ringer solution comprising 155  
805 mM NaCl, 4.5 mM KCl, 1 mM CaCl<sub>2</sub>, 0.5 mM MgCl<sub>2</sub>, 10 mM glucose, and 10 mM HEPES (pH  
806 adjusted to 7.4 with NaOH), (2) Ca<sup>2+</sup>-free Ringer solution containing: 155 mM NaCl, 4.5 mM KCl,



807 1.5 mM MgCl<sub>2</sub>, 10 mM glucose, 1 mM EGTA, 10 mM HEPES, pH 7.4. Live cell imaging was  
808 performed as described earlier. Cells were treated with ADP as indicated in the results section.  
809 *Data acquisition:* Time-lapse images were acquired in a single Z-plane at 512 x 512 pixels (X =  
810 318.2 μm and Y = 318.2 μm) and at 2-3 sec time intervals using Olympus FV3000 software.  
811 Images were time averaged over 3 frames to generate a rolling average and saved as .OIR files.  
812 *Data analysis:* Time-lapse videos were exported to Fiji- ImageJ (<https://imagej.net/Fiji>),  
813 converted to tiff files (16-bit) and background subtracted. Single-cell analysis was performed by  
814 drawing ROIs around individual cells in the field and average pixel intensities in the green and  
815 red channels were calculated for each ROI at each time-point. GCaMP6f/ TdTomato (G/R Ratio)  
816 and Fluo-4/Fura-Red ratio was then obtained to further generate traces showing single-cell and  
817 average changes in cytosolic Ca<sup>2+</sup> over time. Single-cell ratio values was used to calculate Peak  
818 Ca<sup>2+</sup> signal and responses at specific time points after agonist application as previously  
819 reported<sup>60</sup>. Peak Ca<sup>2+</sup> signal for each cell was baseline subtracted, which was calculated as an  
820 average of 10 minimum ratio values before application of agonist. SOCE rate was calculated as  
821  $\Delta(\text{Ratio}) / \Delta t (\text{sec}^{-1})$  over a 10-sec time frame of maximum initial rise after Ca<sup>2+</sup> add-back. Area  
822 under the curve (AUC) was calculated using the AUC function in GraphPad Prism.

### 823 **Microglia process extension analysis:**

824 *Data acquisition:* GFP-expressing iPSC-microglia were plated overnight on 35 mm glass bottom  
825 dishes at 40-50% confluence. Cells were imaged by excitation of GFP on the confocal  
826 microscope at 37° C as described earlier. To study process extension in response to ADP, two  
827 sets of GFP images were obtained for each field of view across multiple dishes: before addition  
828 of ADP (baseline) and 30 min after application of ADP. Images were acquired as a Z-stack using

829 the Galvo scanner at Nyquist sampling. Adjacent fields of view were combined using the  
830 Stitching function of the Olympus FV3000 Software and saved as .OIR files.

831 *Process Analysis:* The basic workflow for microglia process analysis was adapted from Morrison  
832 et al, Sci. Rep, 2017 <sup>72</sup>. Image stacks (.OIR files) were exported to Fiji- Image J and converted  
833 into 16-bit Tiff files using the Olympus Viewer Plugin  
834 (<https://imagej.net/OlympusImageJPlugin>). Maximum intensity projection (MIP) image from  
835 each Z-stack was used for further processing and analysis. MIP images were converted to 8-bit  
836 grey scale images, to which a threshold was applied to obtain 8-bit binary images. The same  
837 threshold was used for all sets of images, both before and after ADP application. Noise  
838 reduction was performed on the binary images using the Process -> Noise -> Unspeckle  
839 function. Outlier pixels were eliminated using Process -> Noise -> Outliers function. The binary  
840 images were then skeletonized using the Skeletonize2D/3D Plugin for Image J  
841 (<https://imagej.net/plugins/skeletonize3d>). Sparingly, manual segmentation was used to  
842 separate a single skeleton that was part of two cells touching each other. The Analyze Skeleton  
843 Plugin (<https://imagej.net/plugins/analyze-skeleton/>) was then applied to the skeletonized  
844 images to obtain parameters related to process length and number of branches for each cell in  
845 the imaging field. Processes were considered to be skeletons > 8  $\mu\text{m}$ . The data was summarized  
846 as average process length and number of branches, before and after ADP application for a  
847 specific imaging field, normalized to the number of cells in the field which allowed for pairwise  
848 comparison. Additionally, single cell data across all experiments were also compared in some  
849 instances.

850 **IP<sub>3</sub> uncaging:** Whole-field uncaging of i-IP<sub>3</sub>, a poorly metabolized IP<sub>3</sub> analog, was performed as  
851 previously described<sup>73</sup> with minor modifications. Briefly, iPSC-microglia were loaded for 20 min  
852 at 37° C with either Cal520 AM or Cal590 AM (5 μM, AAT Bioquest), and the cell permeable,  
853 caged i-IP<sub>3</sub> analog ci-IP<sub>3</sub>/PM (1 μM, SiChem) plus 0.1% Pluronic F-127 in Microglia Basal  
854 Medium. Cells were washed and incubated in the dark for further 30 min in a HEPES-buffered  
855 salt solution (HBSS) whose composition was (in mM): 135 NaCl, 5.4 KCl, 1.0 MgCl<sub>2</sub>, 10 HEPES,  
856 10 glucose, 2.0 CaCl<sub>2</sub>, and pH 7.4. Intracellular Ca<sup>2+</sup> ([Ca<sup>2+</sup>]<sub>i</sub>) changes were imaged by employing  
857 a Nikon Eclipse Ti microscope system (Nikon) equipped with a 40x oil immersion objective  
858 (N.A.: 1.3; Nikon) and an Orca Flash 4.0LT CMOS camera (Hamamatsu). Cal520 or Cal590 were  
859 excited by a 488 or a 560 nm laser light source (Vortran Laser Technologies), respectively. i-IP<sub>3</sub>  
860 uncaging was achieved by uniformly exposing the imaged cells to a single flash of ultraviolet  
861 (UV) light (350-400 nm) from a Xenon arc lamp. UV flash duration, and thus the amount of  
862 released i-IP<sub>3</sub>, was set by an electronically controlled shutter.

863 Image acquisition was performed by using Nikon NIS (Nikon) software. After conversion  
864 to stack tiff files, image sequences were analyzed with Flika, a custom-written Python-based  
865 imaging analysis software (<https://flika-org.github.io/>;<sup>74</sup>). After background subtraction, either  
866 Cal520 or Cal590 fluorescence changes of each cell were expressed as  $\Delta F/F_0$ , where  $F_0$  is the  
867 basal fluorescence intensity and  $\Delta F$  the relative fluorescence change ( $F_x - F_0$ ). Data are reported  
868 as superplots<sup>75</sup> of at least three independent replicates. Experiments were reproduced with  
869 two independent lines. Comparisons were performed by unpaired non-parametric t-test.

870 **Immunocytochemistry:** Cells were fixed with 4 % paraformaldehyde for 7 min and washed 3x  
871 with 1X PBS. Blocking was performed at room temp for 1 hr in 5 % Goat Serum, 0.1 % Triton5 X-

872 100. Primary antibodies were added at 1:200 overnight 4° C (IBA1, 019-19741, FUJIFILM Wako).  
873 Plates were washed 3x before addition of secondary antibodies (Goat anti-Rabbit 555,  
874 ThermoFisher Scientific) and Hoechst (ThermoFisher Scientific). Images were captured on an  
875 Olympus FV3000RS confocal microscope with identical laser and detection settings. Images  
876 were analyzed with IMARIS 9.7.0 software.

877 **Flow Cytometry** iPSC-derived microglia were seeded on fibronectin-coated 12-well plates at  
878 200,000 cells/well. Cells were harvested and centrifuged in FACS tubes at 300 xG for 5 min at 4°  
879 C. The cell pellet was subsequently resuspended in FACS buffer (1X PBS + 0.5% FBS). Fc  
880 receptors were blocked with a blocking buffer (Bio-legend TruStain FcX in 1X PBS + 10% FCS).  
881 Cells were then incubated with Brilliant Violet 421-labelled anti-human P2Y<sub>12</sub> receptor antibody  
882 (clone S16001E, Biolegend, Cat# 392106) or with IgG2a isotype control antibody (clone MOPC-  
883 173, Biolegend, Cat# 400260) for 30 min at 4° C. Cells were washed, pelleted, and then  
884 resuspended in FACS buffer. Clone S16001E binds to the extracellular domain of the P2Y<sub>12</sub> and  
885 permits labeling of plasma membrane P2Y<sub>12</sub> receptors. Data were acquired using Novocyte  
886 Quanteon flow cytometer (Agilent) and analyzed using FlowJo analysis software (FlowJo v10.8.1  
887 LLC Ashland, Oregon).

888 **Scratch wound assay:** Nondirectional motility was analyzed using Essen Incucyte WoundMaker.  
889 iPSC-microglia were plated on fibronectin (STEMCELL Technologies) at 90% confluence.  
890 Scratches were repeated 4x to remove all cells from the wound area. Scratch wound confluency  
891 was imaged every hour until scratch wound was closed (15 hrs). Confluence of cells within the  
892 original wound ROI was calculated using IncuCyte 2020C software.

893 **IMARIS Cell Tracking:** For motility assays, iPSC-microglia were tracked using a combination of  
894 manual and automatic tracking in IMARIS 9.7.0 software. For videos of GFP lines, cells were  
895 tracked using spot identification. For videos of Salsa6f lines, surface tracking was used to  
896 determine ratiometric Ca<sup>2+</sup> fluorescence and motility per cell. In both conditions, tracks were  
897 defined by Brownian motion with the maximum distance jump of 4 microns and 10 frame  
898 disturbance with no gap filling. Tracks shorter than 3 minutes in length were eliminated from  
899 analysis. After automated track formation, tracks underwent manual quality control to  
900 eliminate extraneous tracks, merge falsely distinct tracks, and add missed tracks. After export,  
901 data was plotted in Prism 9.1.0 or analyzed in excel using DiPer macros for Plot\_At\_Origin  
902 (translation of each trajectory to the origin) and mean squared distance (MSD)  $MSD(t)=4D(t-  
903 P(1-e^{-(t/P)}))$  where D is the diffusion coefficient, t is time, and P represents directional  
904 persistence time (time to cross from persistent directionality to random walk)<sup>62</sup>. From IMARIS,  
905 speed was calculated as instantaneous speed of the object ( $\mu\text{m/s}$ ) as the scalar equivalent to  
906 object velocity. These values were transformed to  $\mu\text{m}/\text{min}$  as this time scale is more relevant  
907 for the changes we observed. Mean track speed represents the mean of all instantaneous  
908 speeds over the total time of tracking. 10 min displacement is calculated by  $(600) * (TDL/TD)$ ,  
909 where TDL = track displacement length (distance between the first and last cell position)  
910 represented as  $TDL= p(n) - p(1)$  for all axes where the vector p is the distance between the first  
911 and last object position along the selected axis and TD = track duration represented as  $TD = T(n)  
912 - T(1)$ , where T is the timepoint of the first and final timepoint within the track. Frame-to-frame  
913 displacement is calculated as  $p(n) - p(n-1)$  for all the different frames in a cell track. Track  
914 straightness is defined as  $TDL/TL$  where TDL = track displacement as described above and TL =

915 track length representing the total length of displacements within the track  $TL = \sum$  from  $t=2$  to  
916  $n$  of  $|p(t)-p(t-1)|$ .

917 **Generation of Salsa6f-expressing iPSC lines:** iPSCs were collected following Accutase enzymatic  
918 digestion for 3 min at 37° C. 20,000 cells were resuspended in 100  $\mu$ L nucleofection buffer from  
919 Human Stem Cell Nucleofector™ Kit 2 (Lonza). Salsa6f-AAVS1 SHL plasmid Template (2  $\mu$ g;  
920 Vector Builder) and RNP complex formed by incubating Alt-R® S.p. HiFi Cas9 Nuclease V3 (50  
921  $\mu$ g; IDTDNA) was fused with crRNA:tracrRNA (IDTDNA) duplex for 15 min at 23° C. This complex  
922 was combined with the cellular suspension and nucleofected using the Amaxa Nucleofector  
923 program B-016. To recover, cells were plated in TeSR™-E8™ (STEMCELL Technologies) media  
924 with 0.25  $\mu$ M Thiazovivin (STEMCELL Technologies) and CloneR™ (STEMCELL Technologies)  
925 overnight. The following day, cells were mechanically replated to 96-well plates in TeSR™-E8™  
926 media with 0.25  $\mu$ M Thiazovivin and CloneR™ supplement for clonal isolation and expansion.  
927 Plates were screened visually with a fluorescence microscope to identify TdTomato<sup>+</sup> clones.  
928 Genomic DNA was extracted from positive clones using Extracta DNA prep for PCR (Quantabio)  
929 and amplified using Taq PCR Master Mix (Thermo Fisher Scientific) to confirm diallelic  
930 integration of the Salsa6f cassette. A clone confirmed with diallelic Salsa6f integration in the  
931 AAVS1 SHL was then retargeted as previously described<sup>41</sup> to knock-out Trem2.

932 **Phagocytosis assay:** Phagocytosis of transgenic iPSC-microglia was validated using IncuCyte S3  
933 Live-Cell Analysis System (Sartorius) as in McQuade et al. 2020<sup>41</sup>. Microglia were plated at 50%  
934 confluency 24 hours before substrates were added. Cells were treated with 50  $\mu$ g/mL pHrodo  
935 tagged human AD synaptosomes (isolated as described in McQuade et al. 2020), 100 ng/mL  
936 pHrodo tagged zymosan A beads (Thermo Fisher Scientific), 100 ng/mL pHrodo tagged S.

937 Aureus (Thermo Fisher Scientific), or 2  $\mu\text{g}/\text{mL}$  fluorescent beta-amyloid (Anaspec). Image masks  
938 for fluorescence area and phase were generated using IncuCyte 2020C software.

939 **Chemotaxis assay:** iPSC-microglia were loaded into the angular chamber (2-5K cells/device) to  
940 test activation and chemotaxis towards the central chamber containing either ADP (100 ng/mL  
941 or 234 nM) or vehicle. When noted, PSB 0739 (10  $\mu\text{M}$ ) was added to both the central and  
942 angular chamber to inhibit P2Y<sub>12</sub> receptors. To characterize motility, we monitored the number  
943 of recruited microglia in the central chamber for 4 days under the fully automated Nikon TiE  
944 microscope (10 $\times$  magnification; Micro Device Instruments, Avon, MA, USA).

#### 945 **Statistical Analysis**

946 GraphPad Prism (Version 6.01 and 8.2.0) was used to perform statistical tests and generate P  
947 values. We used standard designation of P values throughout the Figures (**ns**, not significant or  
948  $P \geq 0.05$ ; \*  $P < 0.05$ ; \*\*  $P < 0.01$ ; \*\*\*  $P < 0.001$ ; \*\*\*\*  $P < 0.0001$ ). Traces depicting average  
949 changes in cytosolic Ca<sup>2+</sup> over time are shown as mean  $\pm$  SEM (Standard Error of Mean).  
950 Accompanying bar-graphs with bars depicting mean  $\pm$  SEM (Standard Error of Mean) provide a  
951 summary of relevant parameters (Amplitude of Ca<sup>2+</sup> response, degree of store-release, rate of  
952 Ca<sup>2+</sup> influx etc) as indicated. Details of number of replicates and the specific statistical test used  
953 are provided in the individual figure legends.

954

#### 955 **Acknowledgements**

956 The authors would like to thank Dr. Andy Yeromin for the development of Excel macros to  
957 analyze IMARIS cell tracking. The authors would also like to thank Morgan Coburn for sharing  
958 python scripts that aided in the organization of IMARIS output files. This work was supported by

959 T32 NS082174 and ARCS foundation (A.M.); the European Union’s Horizon 2020 research and  
960 innovation program under the Marie Skłodowska-Curie grant agreement iMIND – No. 84166  
961 (A.G.); NIH R01 NS14609 and AI121945 (M.D.C.); NIH U01 AI160397 (S.O.); NRF  
962 2020R1A2C2010285, 2020M3C7A1023941, and NIH AG059236-01A1 (H.C.); NIH AG048099,  
963 AG056303, and AG055524 (M.B.J.); RF1DA048813 (M.B.J. and S.G.); UCI Sue & Bill Gross Stem  
964 Cell Research Center Seed Grant (S.G.); and a generous gift from the Susan Scott Foundation  
965 (M.B.J.). iPSC lines were generated by the UCI-ADRC iPS cell core funded by NIH AG066519.  
966 Experiments using the GFP-expressing iPSC line AICS-0036 were made possible through the  
967 Allen Cell Collection, available from Coriell Institute for Medical Research.

968

969 **Declaration of interest:** M.B.J. is a co-inventor of patent application WO/2018/160496, related  
970 to the differentiation of pluripotent stem cells into microglia. M.B.J and S.P.G. are co-founders  
971 of NovoGlia Inc.

972 **Ethics:** Human iPSC lines were generated by the University of California Alzheimer’s Disease  
973 Research Center (UCI ADRC) stem cell core. Subject fibroblasts were collected under approved  
974 Institutional Review Boards (IRB) and human Stem Cell Research Oversight (hSCRO) committee  
975 protocols. Informed consent was received for all participants.

976 **Data Availability:** RNA sequencing data referenced in Figure 1- figure supplement 2 is available  
977 through Gene Expression Omnibus: GSE157652. Any additional data presented in this paper will  
978 be available from the authors upon request.

979

980

981



982 **References**

- 983 1. Andersen, M. S. *et al.* Heritability Enrichment Implicates Microglia in Parkinson’s Disease  
984 Pathogenesis. *Annals of Neurology* **89**, 942–951 (2021).
- 985 2. Crotti, A. *et al.* Mutant Huntingtin promotes autonomous microglia activation via myeloid  
986 lineage-determining factors. *Nat Neurosci* **17**, 513–521 (2014).
- 987 3. Fahira, A., Li, Z., Liu, N. & Shi, Y. Prediction of causal genes and gene expression analysis  
988 of attention-deficit hyperactivity disorder in the different brain region, a comprehensive  
989 integrative analysis of ADHD. *Behav Brain Res* **364**, 183–192 (2019).
- 990 4. Jansen, I. E. *et al.* Genome-wide meta-analysis identifies new loci and functional pathways  
991 influencing Alzheimer’s disease risk. *Nat. Genet.* (2019) doi:10.1038/s41588-018-0311-9.
- 992 5. McQuade, A. & Blurton-Jones, M. Microglia in Alzheimer’s disease: Exploring how  
993 genetics and phenotype influence risk. *J Mol Biol* **431**, 1805–1817 (2019).
- 994 6. Pimenova, A. A. *et al.* Alzheimer’s-associated PU.1 expression levels regulate microglial  
995 inflammatory response. *Neurobiol Dis* 105217 (2020) doi:10.1016/j.nbd.2020.105217.
- 996 7. Tan, L. *et al.* Association of GWAS-linked loci with late-onset Alzheimer’s disease in a  
997 northern Han Chinese population. *Alzheimers Dement* **9**, 546–553 (2013).
- 998 8. Davalos, D. *et al.* ATP mediates rapid microglial response to local brain injury in vivo. *Nat.*  
999 *Neurosci.* **8**, 752–758 (2005).
- 1000 9. De Simone, R. *et al.* TGF- $\beta$  and LPS modulate ADP-induced migration of microglial cells  
1001 through P2Y1 and P2Y12 receptor expression. *J. Neurochem.* **115**, 450–459 (2010).
- 1002 10. Honda, S. *et al.* Extracellular ATP or ADP Induce Chemotaxis of Cultured Microglia  
1003 through Gi/o-Coupled P2Y Receptors. *J. Neurosci.* **21**, 1975–1982 (2001).

- 1004 11. Koizumi, S. *et al.* UDP acting at P2Y6 receptors is a mediator of microglial phagocytosis.  
1005 *Nature* **446**, 1091–1095 (2007).
- 1006 12. Haynes, S. E. *et al.* The P2Y12 receptor regulates microglial activation by extracellular  
1007 nucleotides. *Nat Neurosci* **9**, 1512–1519 (2006).
- 1008 13. Yegutkin, G. G. Nucleotide- and nucleoside-converting ectoenzymes: Important modulators  
1009 of purinergic signalling cascade. *Biochim Biophys Acta* **1783**, 673–694 (2008).
- 1010 14. Dissing-Olesen, L. *et al.* Activation of neuronal NMDA receptors triggers transient ATP-  
1011 mediated microglial process outgrowth. *J Neurosci* **34**, 10511–10527 (2014).
- 1012 15. Madry, C. & Attwell, D. Receptors, ion channels, and signaling mechanisms underlying  
1013 microglial dynamics. *J Biol Chem* **290**, 12443–12450 (2015).
- 1014 16. Zhang, Y. *et al.* An RNA-Sequencing Transcriptome and Splicing Database of Glia,  
1015 Neurons, and Vascular Cells of the Cerebral Cortex. *J. Neurosci.* **34**, 11929–11947 (2014).
- 1016 17. Prakriya, M. & Lewis, R. S. Store-Operated Calcium Channels. *Physiol Rev* **95**, 1383–1436  
1017 (2015).
- 1018 18. McLarnon, J. G. Microglial Store-operated Calcium Signaling in Health and in Alzheimer’s  
1019 Disease. *Curr Alzheimer Res* **17**, 1057–1064 (2020).
- 1020 19. Mizuma, A. *et al.* Microglial Calcium Release-Activated Calcium Channel Inhibition  
1021 Improves Outcome from Experimental Traumatic Brain Injury and Microglia-Induced  
1022 Neuronal Death. *J Neurotrauma* **36**, 996–1007 (2019).
- 1023 20. Gilbert, D. F. *et al.* Store-Operated Ca<sup>2+</sup> Entry (SOCE) and Purinergic Receptor-Mediated  
1024 Ca<sup>2+</sup> Homeostasis in Murine bv2 Microglia Cells: Early Cellular Responses to ATP-  
1025 Mediated Microglia Activation. *Front Mol Neurosci* **9**, 111 (2016).

- 1026 21. Hasselmann, J. *et al.* Development of a Chimeric Model to Study and Manipulate Human  
1027 Microglia In Vivo. *Neuron* (2019) doi:10.1016/j.neuron.2019.07.002.
- 1028 22. Keren-Shaul, H. *et al.* A Unique Microglia Type Associated with Restricting Development  
1029 of Alzheimer’s Disease. *Cell* **0**, (2017).
- 1030 23. Krasemann, S. *et al.* The TREM2-APOE Pathway Drives the Transcriptional Phenotype of  
1031 Dysfunctional Microglia in Neurodegenerative Diseases. *Immunity* **47**, 566-581.e9 (2017).
- 1032 24. Olah, M. *et al.* Single cell RNA sequencing of human microglia uncovers a subset associated  
1033 with Alzheimer’s disease. *Nature Communications* **11**, 6129 (2020).
- 1034 25. Sala Frigerio, C. *et al.* The Major Risk Factors for Alzheimer’s Disease: Age, Sex, and  
1035 Genes Modulate the Microglia Response to A $\beta$  Plaques. *Cell Rep* **27**, 1293-1306.e6 (2019).
- 1036 26. Weisman, G. A., Woods, L. T., Erb, L. & Seye, C. I. P2Y receptors in the mammalian  
1037 nervous system: pharmacology, ligands and therapeutic potential. *CNS Neurol Disord Drug*  
1038 *Targets* **11**, 722–738 (2012).
- 1039 27. Cserép, C. *et al.* Microglia monitor and protect neuronal function through specialized  
1040 somatic purinergic junctions. *Science* **367**, 528–537 (2020).
- 1041 28. Suzuki, T. *et al.* Extracellular ADP augments microglial inflammasome and NF- $\kappa$ B  
1042 activation via the P2Y12 receptor. *European Journal of Immunology* **50**, 205–219 (2020).
- 1043 29. Wu, Y. *et al.* Aberrant expression of long noncoding RNAs in the serum and myocardium of  
1044 spontaneous hypertensive rats. *Mol Biol Rep* **46**, 6399–6404 (2019).
- 1045 30. Eyo, U. B. *et al.* Neuronal hyperactivity recruits microglial processes via neuronal NMDA  
1046 receptors and microglial P2Y12 receptors after status epilepticus. *J Neurosci* **34**, 10528–  
1047 10540 (2014).

- 1048 31. Lou, N. *et al.* Purinergic receptor P2RY12-dependent microglial closure of the injured  
1049 blood–brain barrier. *PNAS* **113**, 1074–1079 (2016).
- 1050 32. Bisht, K. *et al.* Capillary-associated microglia regulate vascular structure and function  
1051 through PANX1-P2RY12 coupling in mice. *Nat Commun* **12**, 5289 (2021).
- 1052 33. Leissring, M. A. *et al.* Capacitative calcium entry deficits and elevated luminal calcium  
1053 content in mutant presenilin-1 knockin mice. *J Cell Biol* **149**, 793–798 (2000).
- 1054 34. Brawek, B. *et al.* Impairment of in vivo calcium signaling in amyloid plaque-associated  
1055 microglia. *Acta Neuropathol* **127**, 495–505 (2014).
- 1056 35. Demuro, A., Parker, I. & Stutzmann, G. E. Calcium Signaling and Amyloid Toxicity in  
1057 Alzheimer Disease. *J Biol Chem* **285**, 12463–12468 (2010).
- 1058 36. Mustaly, S., Littlefield, A. & Stutzmann, G. E. Calcium Signaling Deficits in Glia and  
1059 Autophagic Pathways Contributing to Neurodegenerative Disease. *Antioxid. Redox Signal.*  
1060 (2018) doi:10.1089/ars.2017.7266.
- 1061 37. Eichhoff, G., Brawek, B. & Garaschuk, O. Microglial calcium signal acts as a rapid sensor of  
1062 single neuron damage in vivo. *Biochim Biophys Acta* **1813**, 1014–1024 (2011).
- 1063 38. Irino, Y., Nakamura, Y., Inoue, K., Kohsaka, S. & Ohsawa, K. Akt activation is involved in  
1064 P2Y12 receptor-mediated chemotaxis of microglia. *J Neurosci Res* **86**, 1511–1519 (2008).
- 1065 39. Milior, G. *et al.* Distinct P2Y Receptors Mediate Extension and Retraction of Microglial  
1066 Processes in Epileptic and Peritumoral Human Tissue. *J Neurosci* **40**, 1373–1388 (2020).
- 1067 40. Cheng-Hathaway, P. J. *et al.* The Trem2 R47H variant confers loss-of-function-like  
1068 phenotypes in Alzheimer’s disease. *Mol Neurodegener* **13**, 29 (2018).

- 1069 41. McQuade, A. *et al.* Gene expression and functional deficits underlie TREM2-knockout  
1070 microglia responses in human models of Alzheimer’s disease. *Nature Communications* **11**,  
1071 5370 (2020).
- 1072 42. Ulrich, J. D. *et al.* Altered microglial response to A $\beta$  plaques in APPPS1-21 mice  
1073 heterozygous for TREM2. *Mol Neurodegener* **9**, 20 (2014).
- 1074 43. Andrews, S. J., Fulton-Howard, B. & Goate, A. Interpretation of risk loci from genome-wide  
1075 association studies of Alzheimer’s disease. *Lancet Neurol* (2020) doi:10.1016/S1474-  
1076 4422(19)30435-1.
- 1077 44. Karch, C. M. *et al.* Expression of Novel Alzheimer’s Disease Risk Genes in Control and  
1078 Alzheimer’s Disease Brains. *PLOS ONE* **7**, e50976 (2012).
- 1079 45. Cheng, Q. *et al.* TREM2-activating antibodies abrogate the negative pleiotropic effects of the  
1080 Alzheimer’s disease variant Trem2R47H on murine myeloid cell function. *J. Biol. Chem.*  
1081 **293**, 12620–12633 (2018).
- 1082 46. Gratuze, M. *et al.* Impact of TREM2<sup>R47H</sup> variant on tau pathology–induced gliosis and  
1083 neurodegeneration. *J Clin Invest* **130**, 4954–4968 (2020).
- 1084 47. Götzl, J. K. *et al.* Opposite microglial activation stages upon loss of PGRN or TREM2 result  
1085 in reduced cerebral glucose metabolism. *EMBO Mol Med* **11**, e9711 (2019).
- 1086 48. Griciuc, A. *et al.* TREM2 Acts Downstream of CD33 in Modulating Microglial Pathology in  
1087 Alzheimer’s Disease. *Neuron* **103**, 820-835.e7 (2019).
- 1088 49. Abud, E. M. *et al.* iPSC-Derived Human Microglia-like Cells to Study Neurological  
1089 Diseases. *Neuron* **94**, 278-293.e9 (2017).
- 1090 50. McQuade, A. *et al.* Development and validation of a simplified method to generate human  
1091 microglia from pluripotent stem cells. *Molecular Neurodegeneration* **13**, 67 (2018).

- 1092 51. McQuade, A. & Blurton-Jones, M. Human Induced Pluripotent Stem Cell-Derived Microglia  
1093 (hiPSC-Microglia). *Methods Mol Biol* (2021) doi:10.1007/7651\_2021\_429.
- 1094 52. Andreone, B. J. *et al.* Alzheimer's-associated PLC $\gamma$ 2 is a signaling node required for both  
1095 TREM2 function and the inflammatory response in human microglia. *Nature Neuroscience*  
1096 1–12 (2020) doi:10.1038/s41593-020-0650-6.
- 1097 53. Cosker, K. *et al.* Microglial signalling pathway deficits associated with the patient derived  
1098 R47H TREM2 variants linked to AD indicate inability to activate inflammasome. *Sci Rep*  
1099 **11**, 13316 (2021).
- 1100 54. Konttinen, H. *et al.* PSEN1 $\Delta$ E9, APP<sup>swe</sup>, and APOE4 Confer Disparate Phenotypes in  
1101 Human iPSC-Derived Microglia. *Stem Cell Reports* (2019)  
1102 doi:10.1016/j.stemcr.2019.08.004.
- 1103 55. Piers, T. M. *et al.* A locked immunometabolic switch underlies TREM2 R47H loss of  
1104 function in human iPSC-derived microglia. *FASEB J.* (2019) doi:10.1096/fj.201902447R.
- 1105 56. You, Y. *et al.* Human neural cell type-specific extracellular vesicle proteome defines disease-  
1106 related molecules associated with activated astrocytes in Alzheimer's disease brain. *J*  
1107 *Extracell Vesicles* **11**, e12183 (2022).
- 1108 57. Michaelis, M., Nieswandt, B., Stegner, D., Eilers, J. & Kraft, R. STIM1, STIM2, and Orai1  
1109 regulate store-operated calcium entry and purinergic activation of microglia. *Glia* **63**, 652–  
1110 663 (2015).
- 1111 58. Visentin, S., Nuccio, C. D. & Bellenchi, G. C. Different patterns of Ca<sup>2+</sup> signals are induced  
1112 by low compared to high concentrations of P2Y agonists in microglia. *Purinergic Signal* **2**,  
1113 605–617 (2006).

- 1114 59. Dong, T. X. *et al.* T-cell calcium dynamics visualized in a ratiometric tdTomato-GCaMP6f  
1115 transgenic reporter mouse. *eLife* **6**, e32417 (2017).
- 1116 60. Jairaman, A. & Cahalan, M. D. Calcium Imaging in T Lymphocytes: a Protocol for Use with  
1117 Genetically Encoded or Chemical Ca<sup>2+</sup> Indicators. *Bio Protoc* **11**, e4170 (2021).
- 1118 61. Borges, P. A. *et al.* Adenosine Diphosphate Improves Wound Healing in Diabetic Mice  
1119 Through P2Y<sub>12</sub> Receptor Activation. *Front. Immunol.* **12**, (2021).
- 1120 62. Gorelik, R. & Gautreau, A. Quantitative and unbiased analysis of directional persistence in  
1121 cell migration. *Nature Protocols* **9**, 1931–1943 (2014).
- 1122 63. Negulescu, P. A., Krasieva, T. B., Khan, A., Kerschbaum, H. H. & Cahalan, M. D. Polarity  
1123 of T cell shape, motility, and sensitivity to antigen. *Immunity* **4**, 421–430 (1996).
- 1124 64. Liang, C.-C., Park, A. Y. & Guan, J.-L. In vitro scratch assay: a convenient and inexpensive  
1125 method for analysis of cell migration in vitro. *Nat Protoc* **2**, 329–333 (2007).
- 1126 65. Park, J. *et al.* A 3D human triculture system modeling neurodegeneration and  
1127 neuroinflammation in Alzheimer’s disease. *Nat. Neurosci.* **21**, 941–951 (2018).
- 1128 66. Meilandt, W. J. *et al.* Trem2 deletion reduces late-stage amyloid plaque accumulation,  
1129 elevates the A $\beta$ <sub>42</sub>:A $\beta$ <sub>40</sub> ratio, and exacerbates axonal dystrophy and dendritic spine loss in  
1130 the PS2APP Alzheimer’s mouse model. *J. Neurosci.* (2020) doi:10.1523/JNEUROSCI.1871-  
1131 19.2019.
- 1132 67. Ilina, O. & Friedl, P. Mechanisms of collective cell migration at a glance. *J Cell Sci* **122**,  
1133 3203–3208 (2009).
- 1134 68. Lim, H. M. *et al.* UDP-Induced Phagocytosis and ATP-Stimulated Chemotactic Migration  
1135 Are Impaired in STIM1<sup>-/-</sup> Microglia In Vitro and In Vivo. *Mediators Inflamm* **2017**,  
1136 8158514 (2017).

- 1137 69. S, P. *et al.* Loss of TREM2 Function Increases Amyloid Seeding but Reduces Plaque-  
1138 Associated ApoE. *Nature neuroscience* vol. 22  
1139 [https://pubmed.ncbi.nlm.nih.gov/30617257/?from\\_single\\_result=30617257&expanded\\_search](https://pubmed.ncbi.nlm.nih.gov/30617257/?from_single_result=30617257&expanded_search_h_query=30617257)  
1140 [h\\_query=30617257](https://pubmed.ncbi.nlm.nih.gov/30617257/?from_single_result=30617257&expanded_search_h_query=30617257) (2019).
- 1141 70. Alector Inc. *A Phase 2 Randomized, Double-Blind, Placebo-Controlled, Multicenter Study to*  
1142 *Evaluate the Efficacy and Safety of AL002 in Participants With Early Alzheimer’s Disease.*  
1143 <https://clinicaltrials.gov/ct2/show/NCT04592874> (2021).
- 1144 71. Wang, S. *et al.* Anti-human TREM2 induces microglia proliferation and reduces pathology  
1145 in an Alzheimer’s disease model. *J Exp Med* **217**, (2020).
- 1146 72. Morrison, H., Young, K., Qureshi, M., Rowe, R. K. & Lifshitz, J. Quantitative microglia  
1147 analyses reveal diverse morphologic responses in the rat cortex after diffuse brain injury. *Sci*  
1148 *Rep* **7**, 13211 (2017).
- 1149 73. Lock, J. T., Parker, I. & Smith, I. F. Communication of Ca(2+) signals via tunneling  
1150 membrane nanotubes is mediated by transmission of inositol trisphosphate through gap  
1151 junctions. *Cell Calcium* **60**, 266–272 (2016).
- 1152 74. Ellefsen, K. L., Settle, B., Parker, I. & Smith, I. F. An algorithm for automated detection,  
1153 localization and measurement of local calcium signals from camera-based imaging. *Cell*  
1154 *Calcium* **56**, 147–156 (2014).
- 1155 75. Lord, S. J., Velle, K. B., Mullins, R. D. & Fritz-Laylin, L. K. SuperPlots: Communicating  
1156 reproducibility and variability in cell biology. *J Cell Biol* **219**, (2020).

1157  
1158



1159 **Insert Figures with captions (not complete legends) here for the pdf file.**

# Figure 1

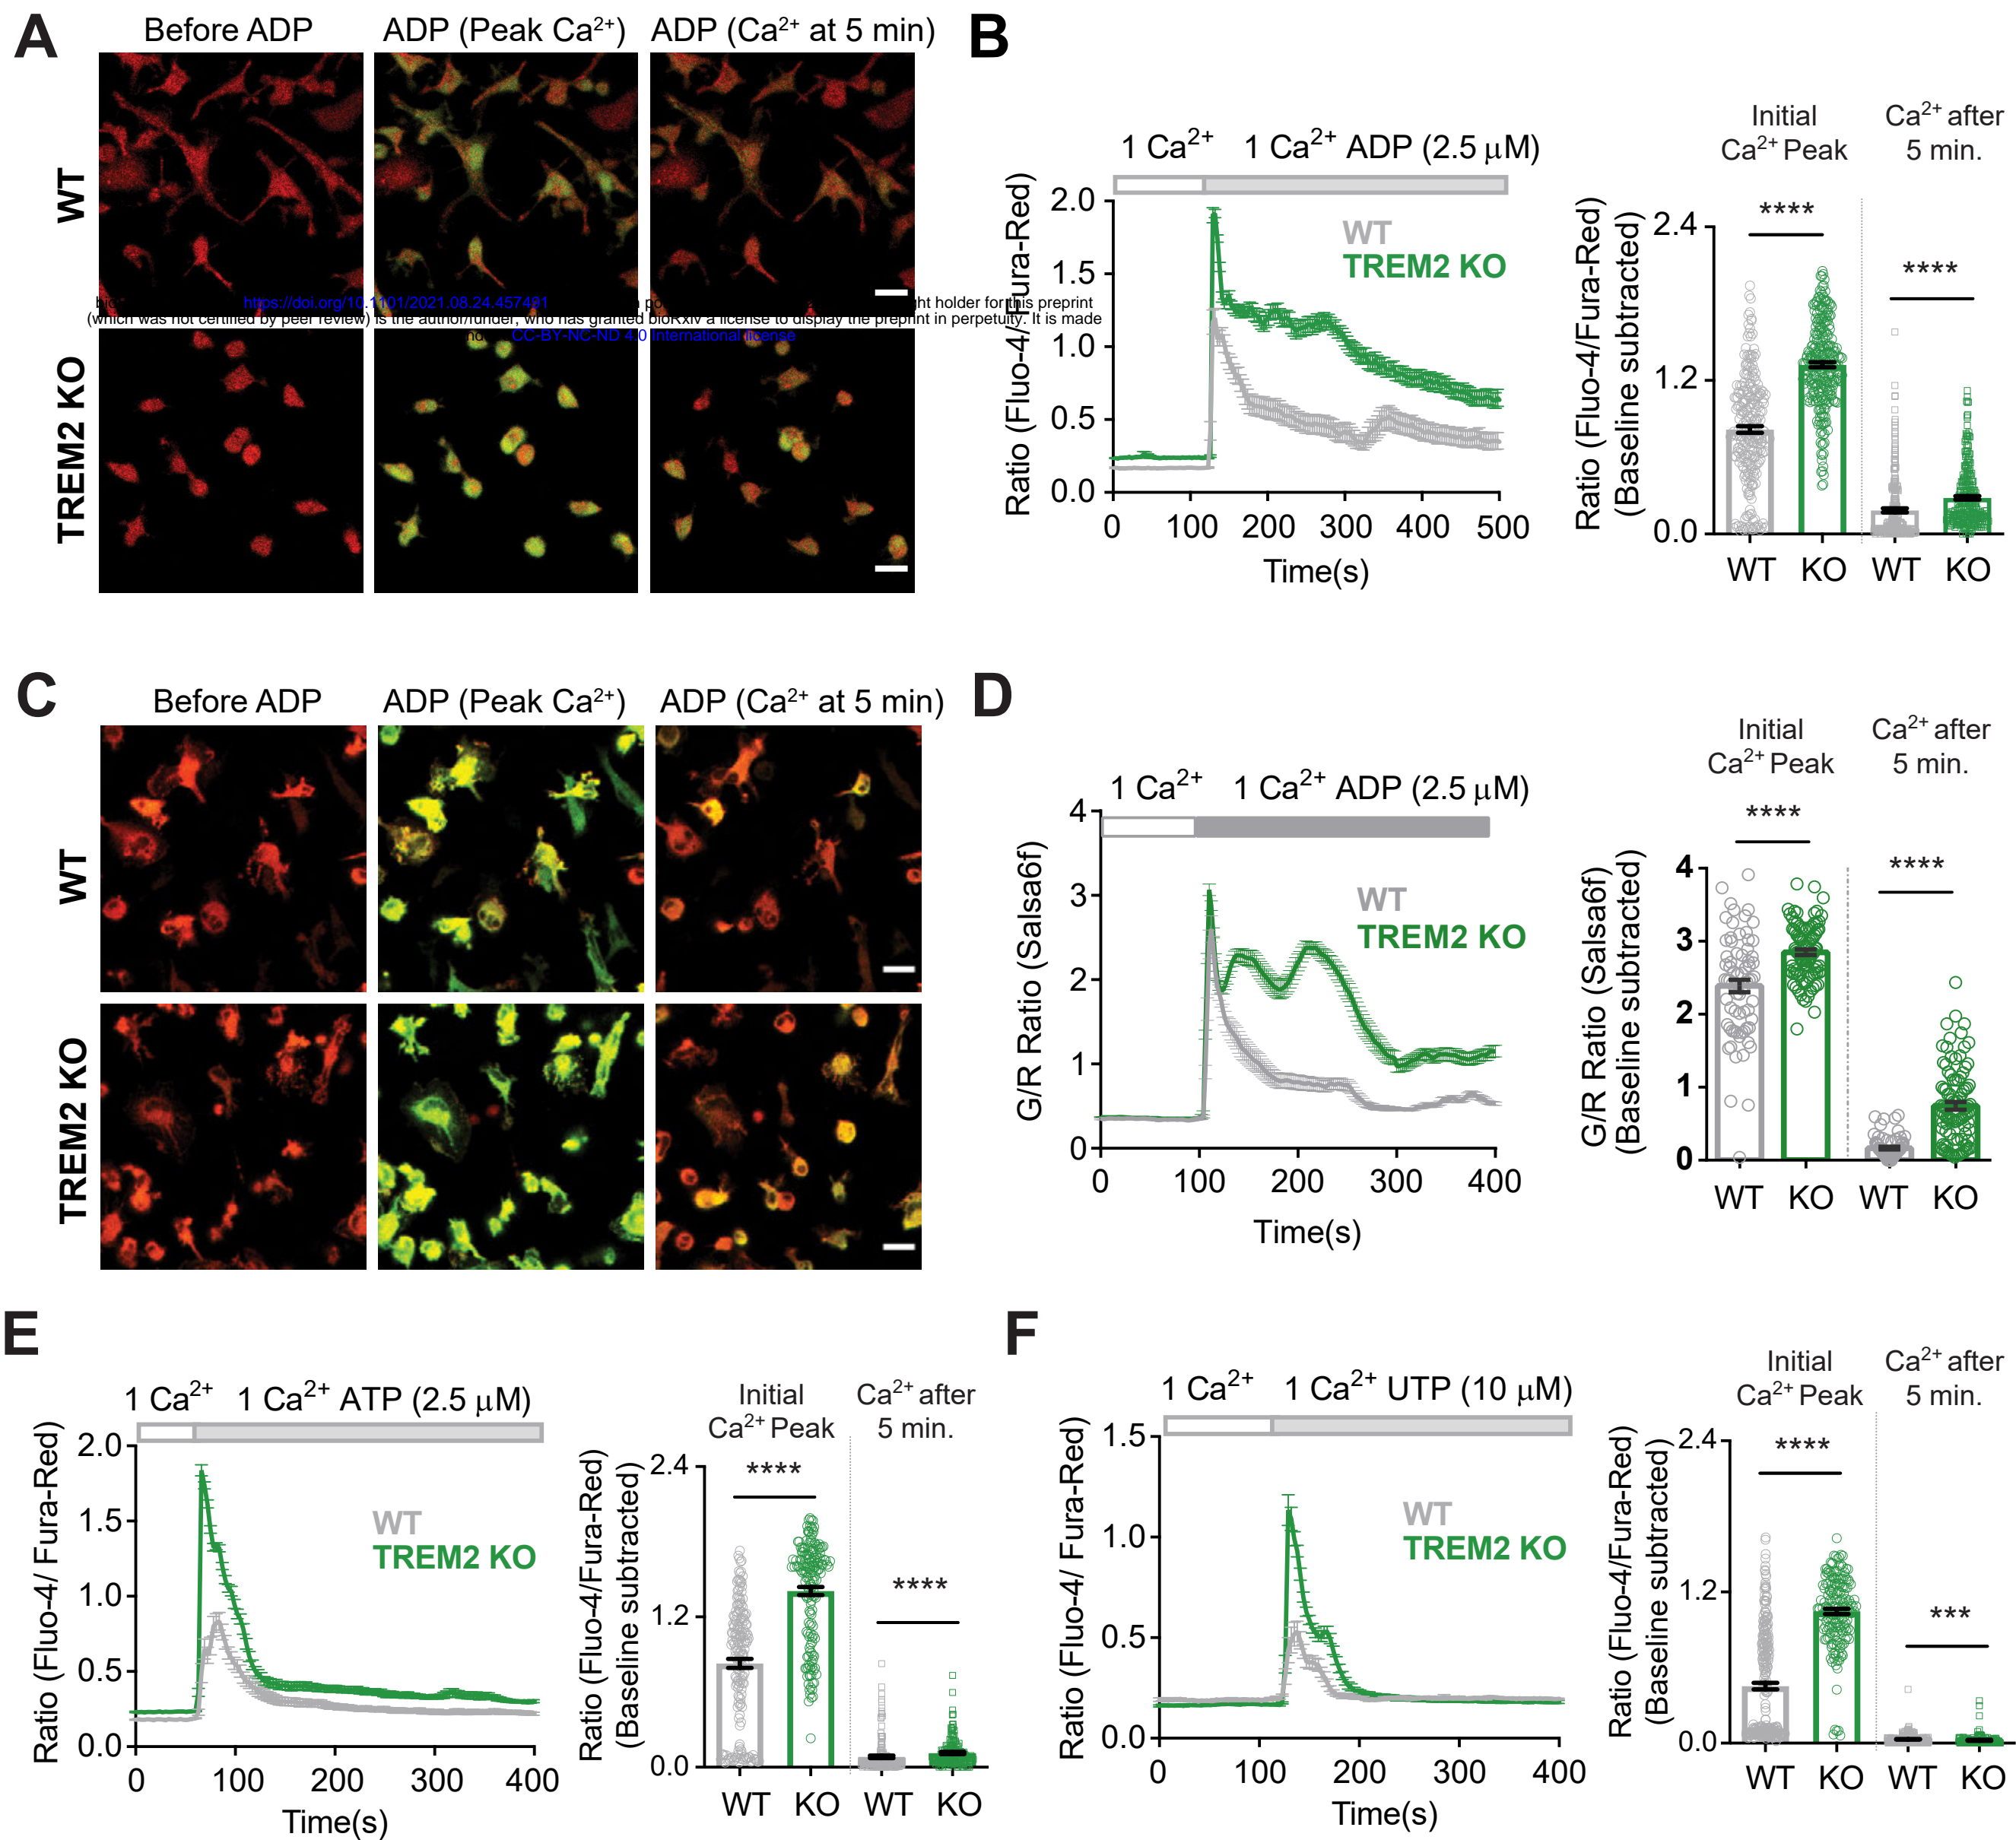

**Figure 1-figure supplement 1**

**A**

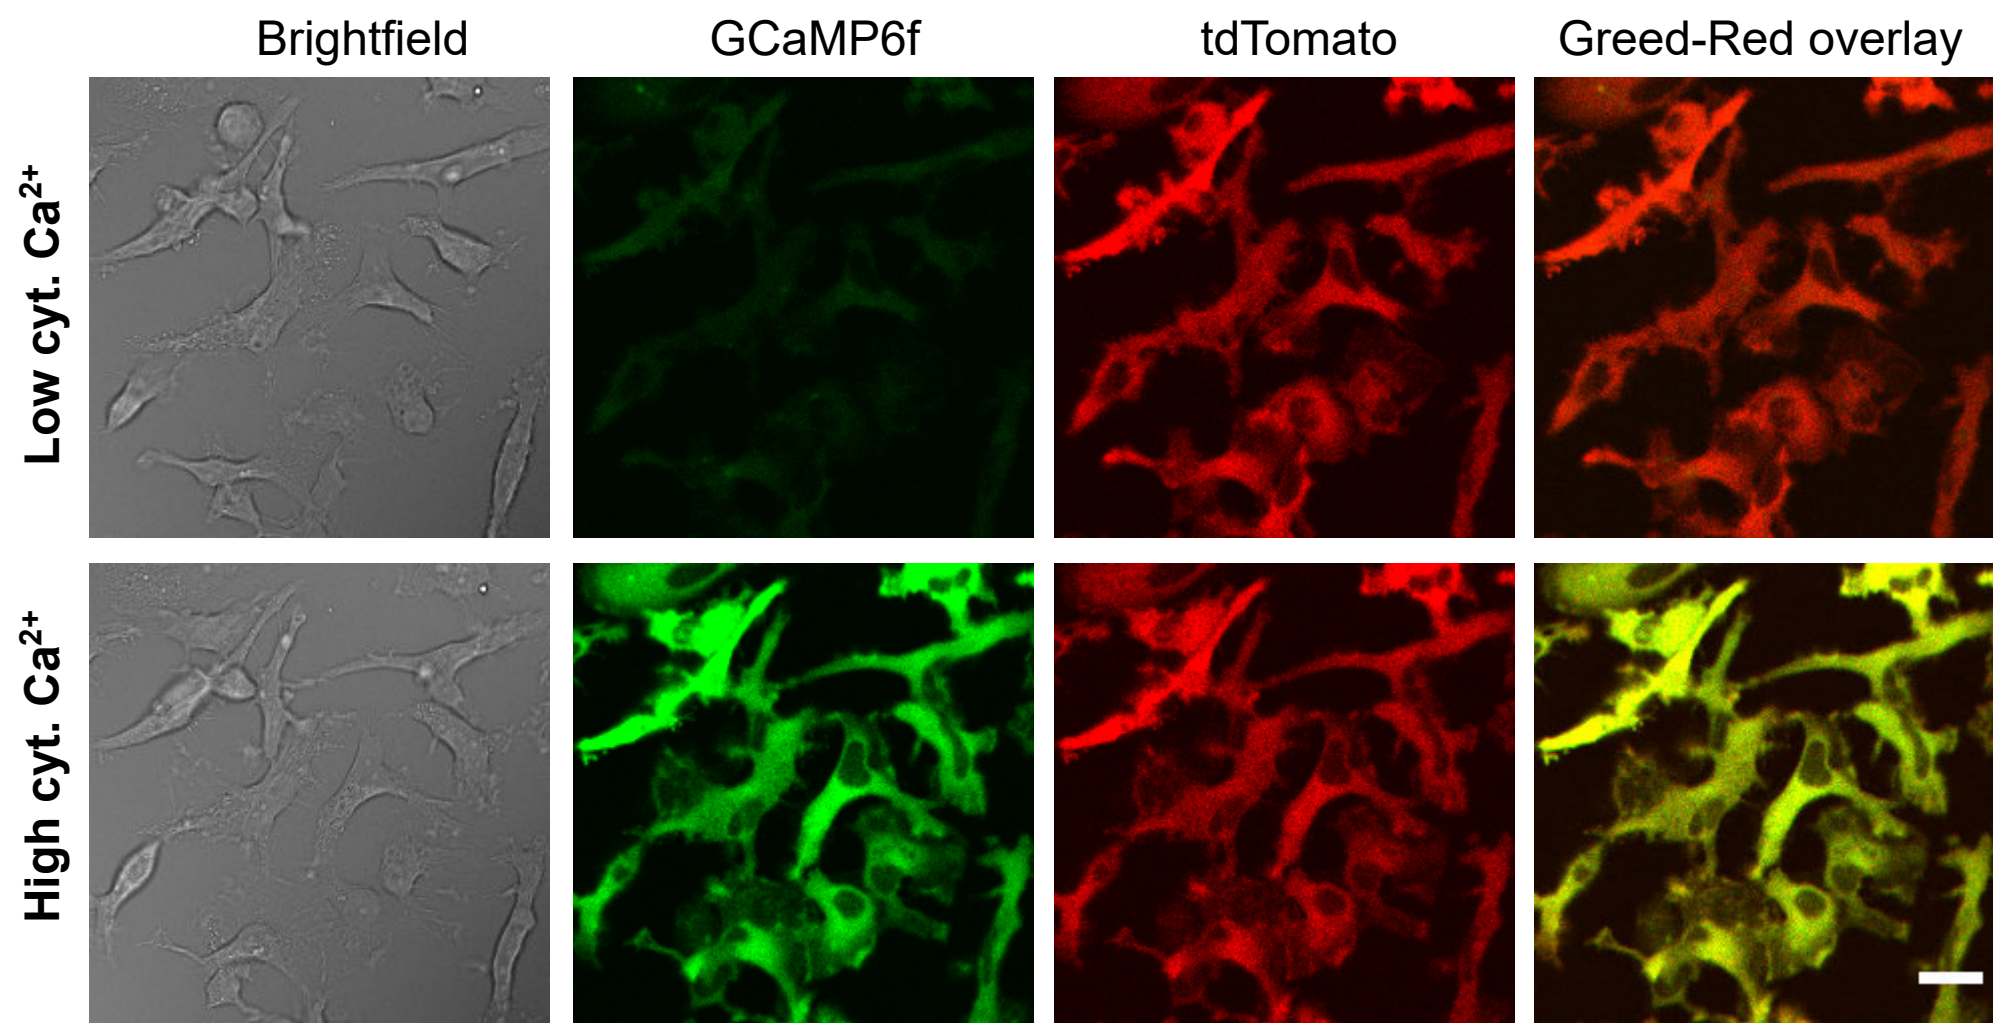

**B**

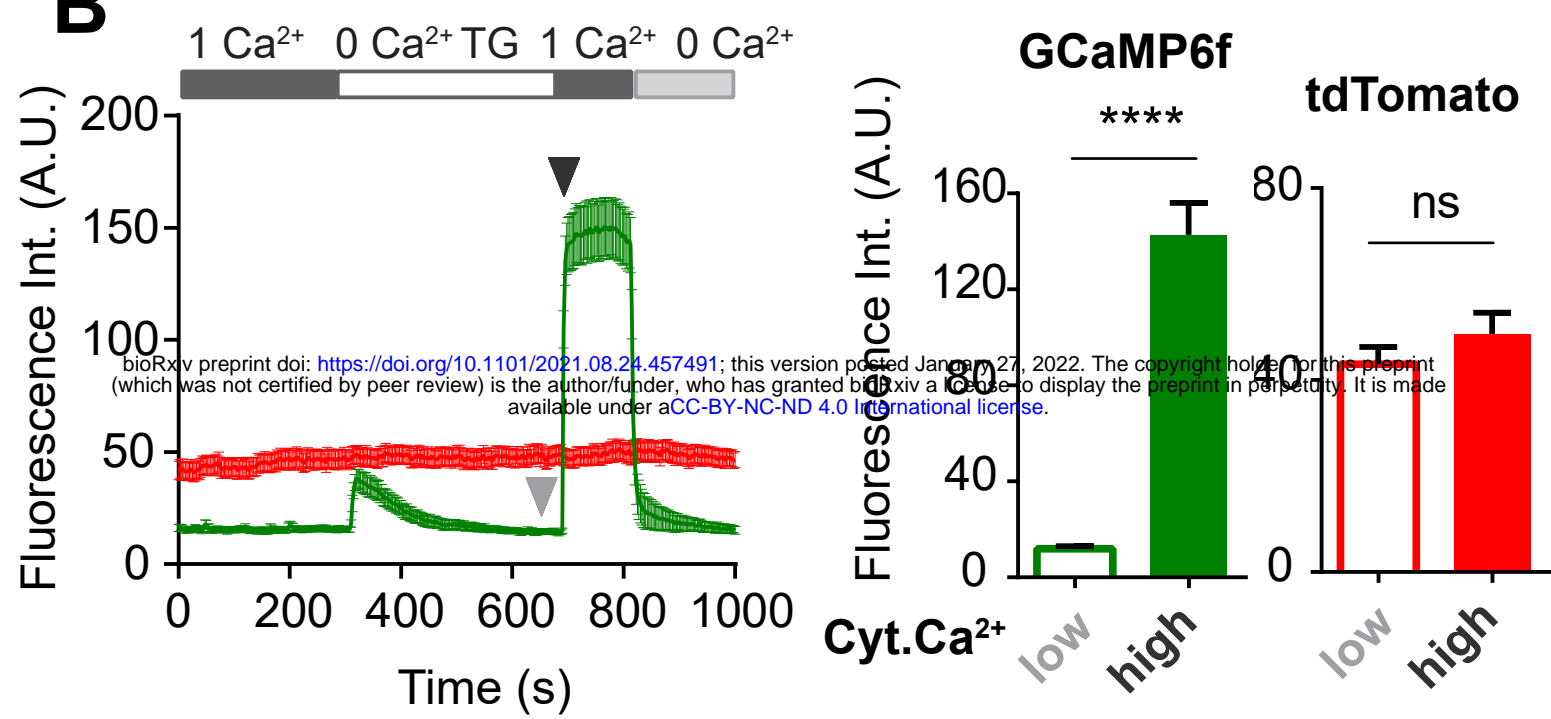

**C**

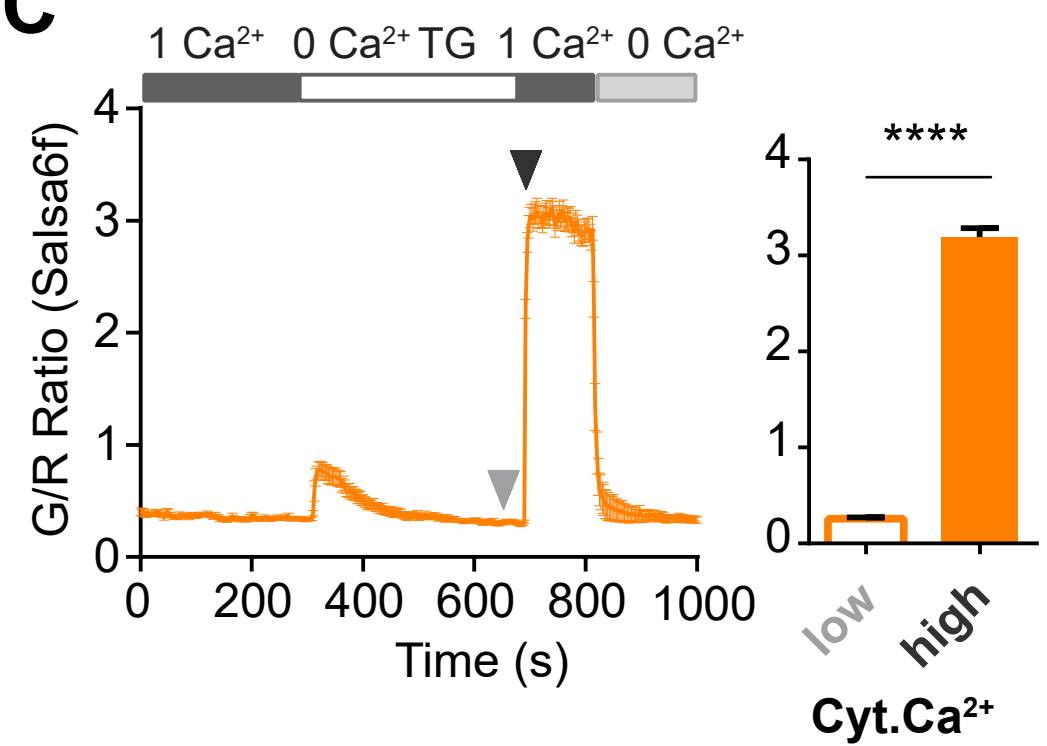

**D**

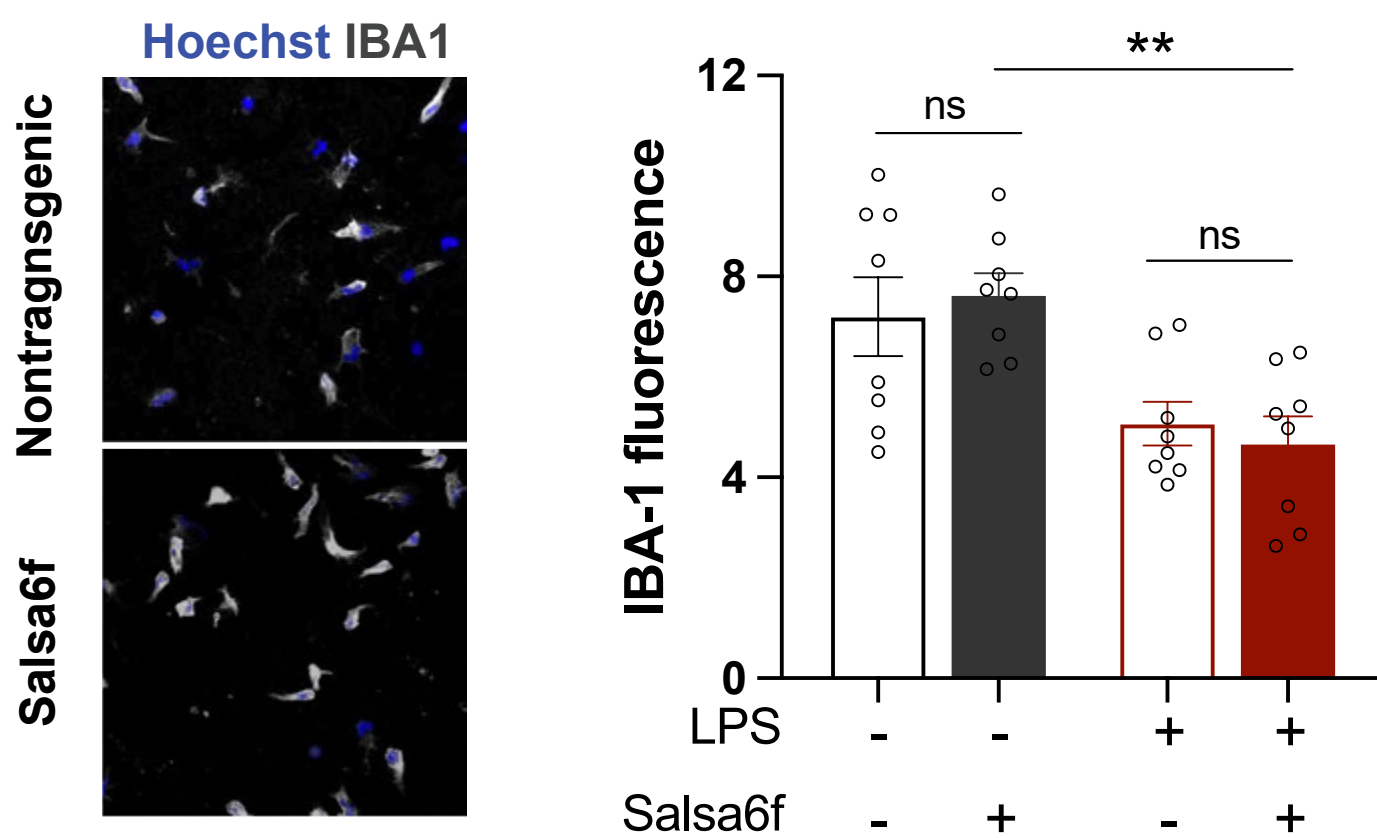

**E**

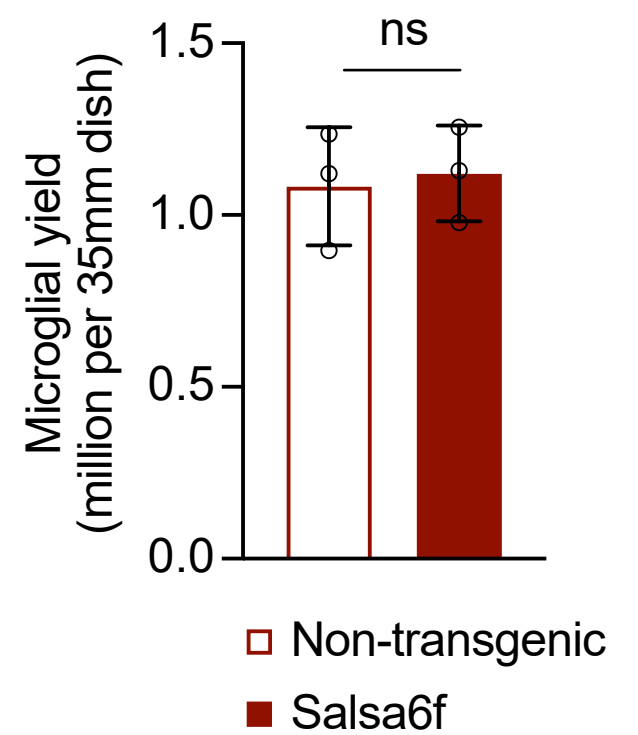

**F**

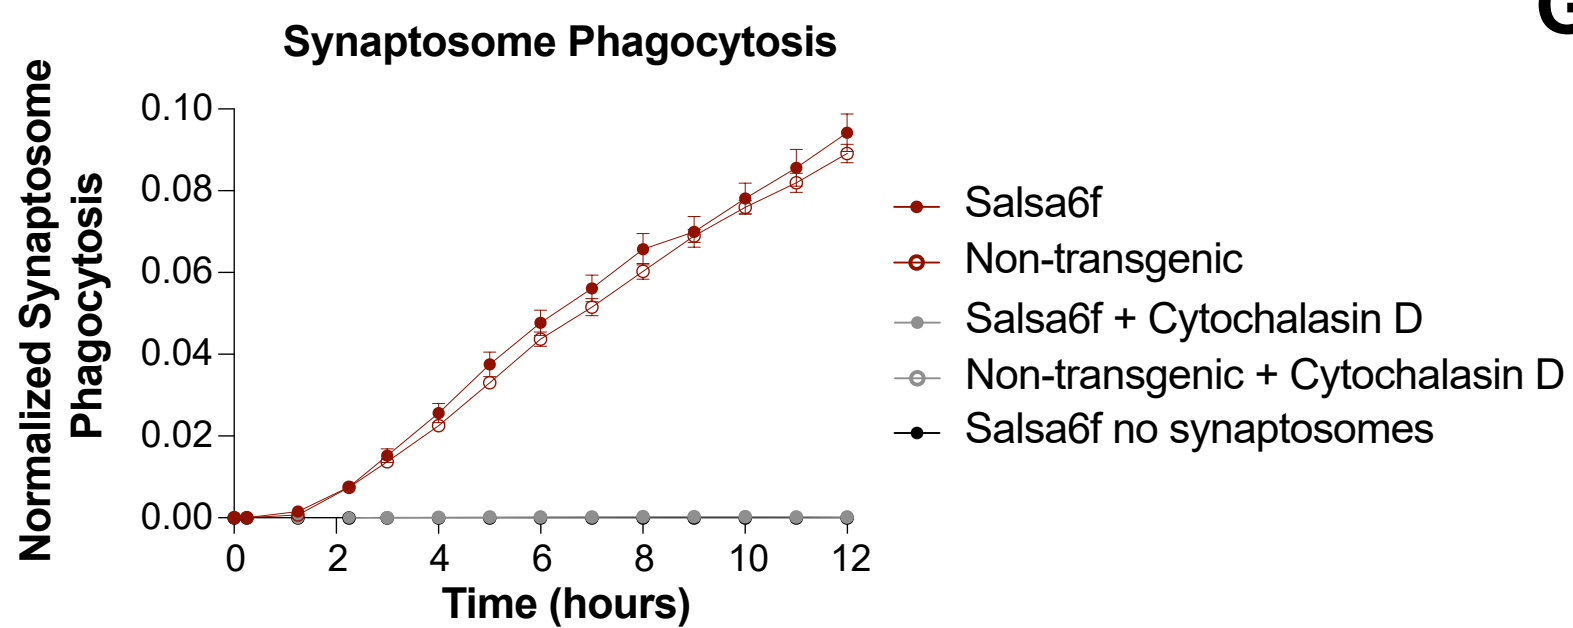

**G**

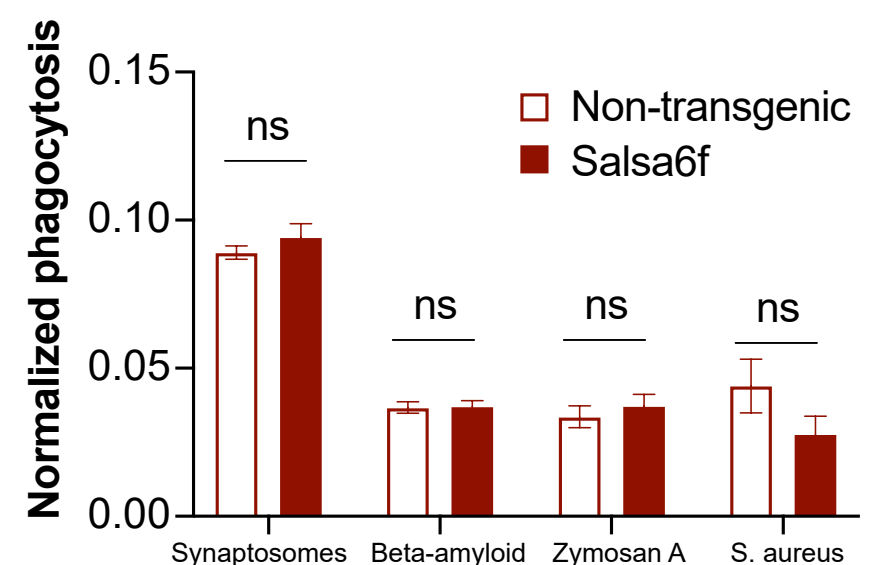

# Figure 1-figure supplement 2

## A

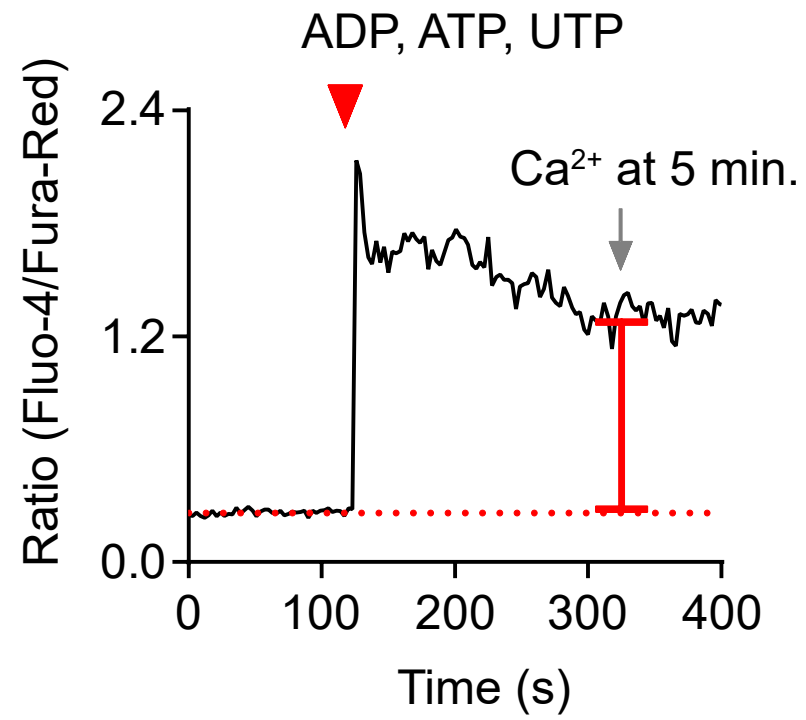

## B

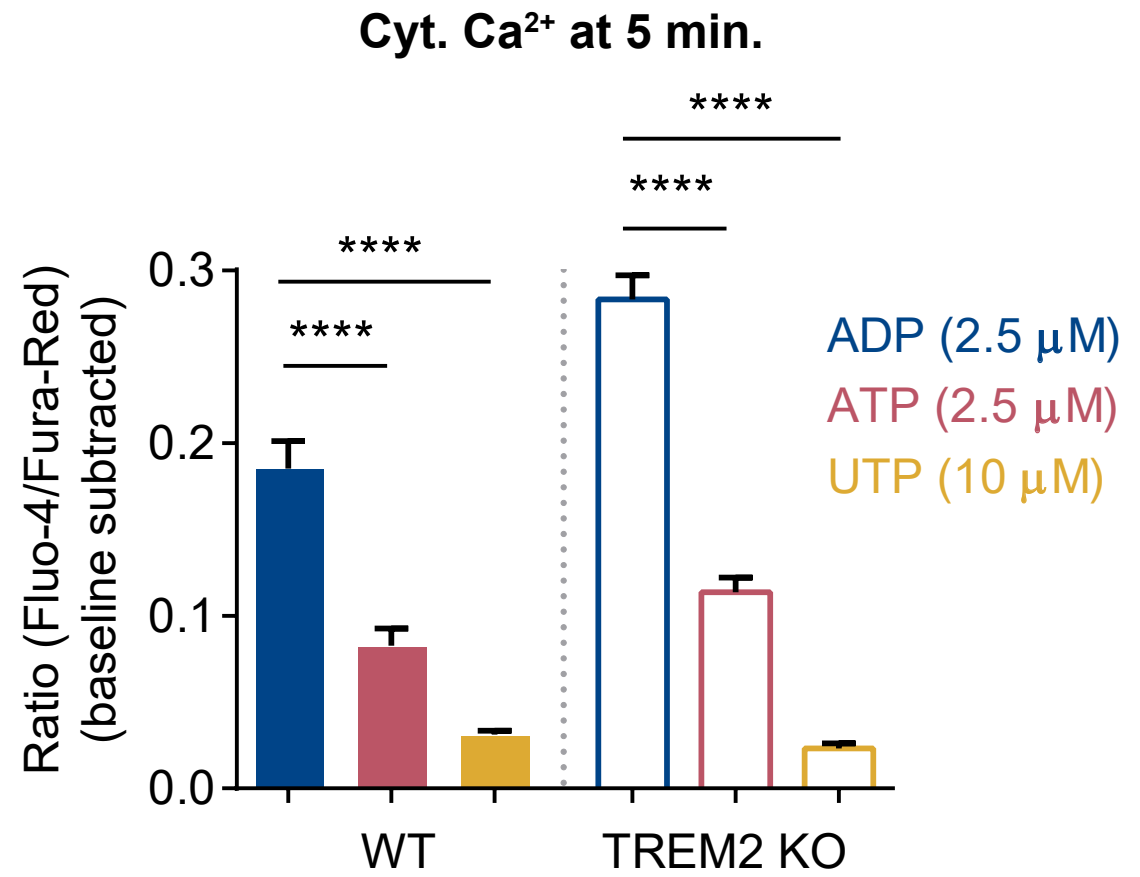

**Figure 2**

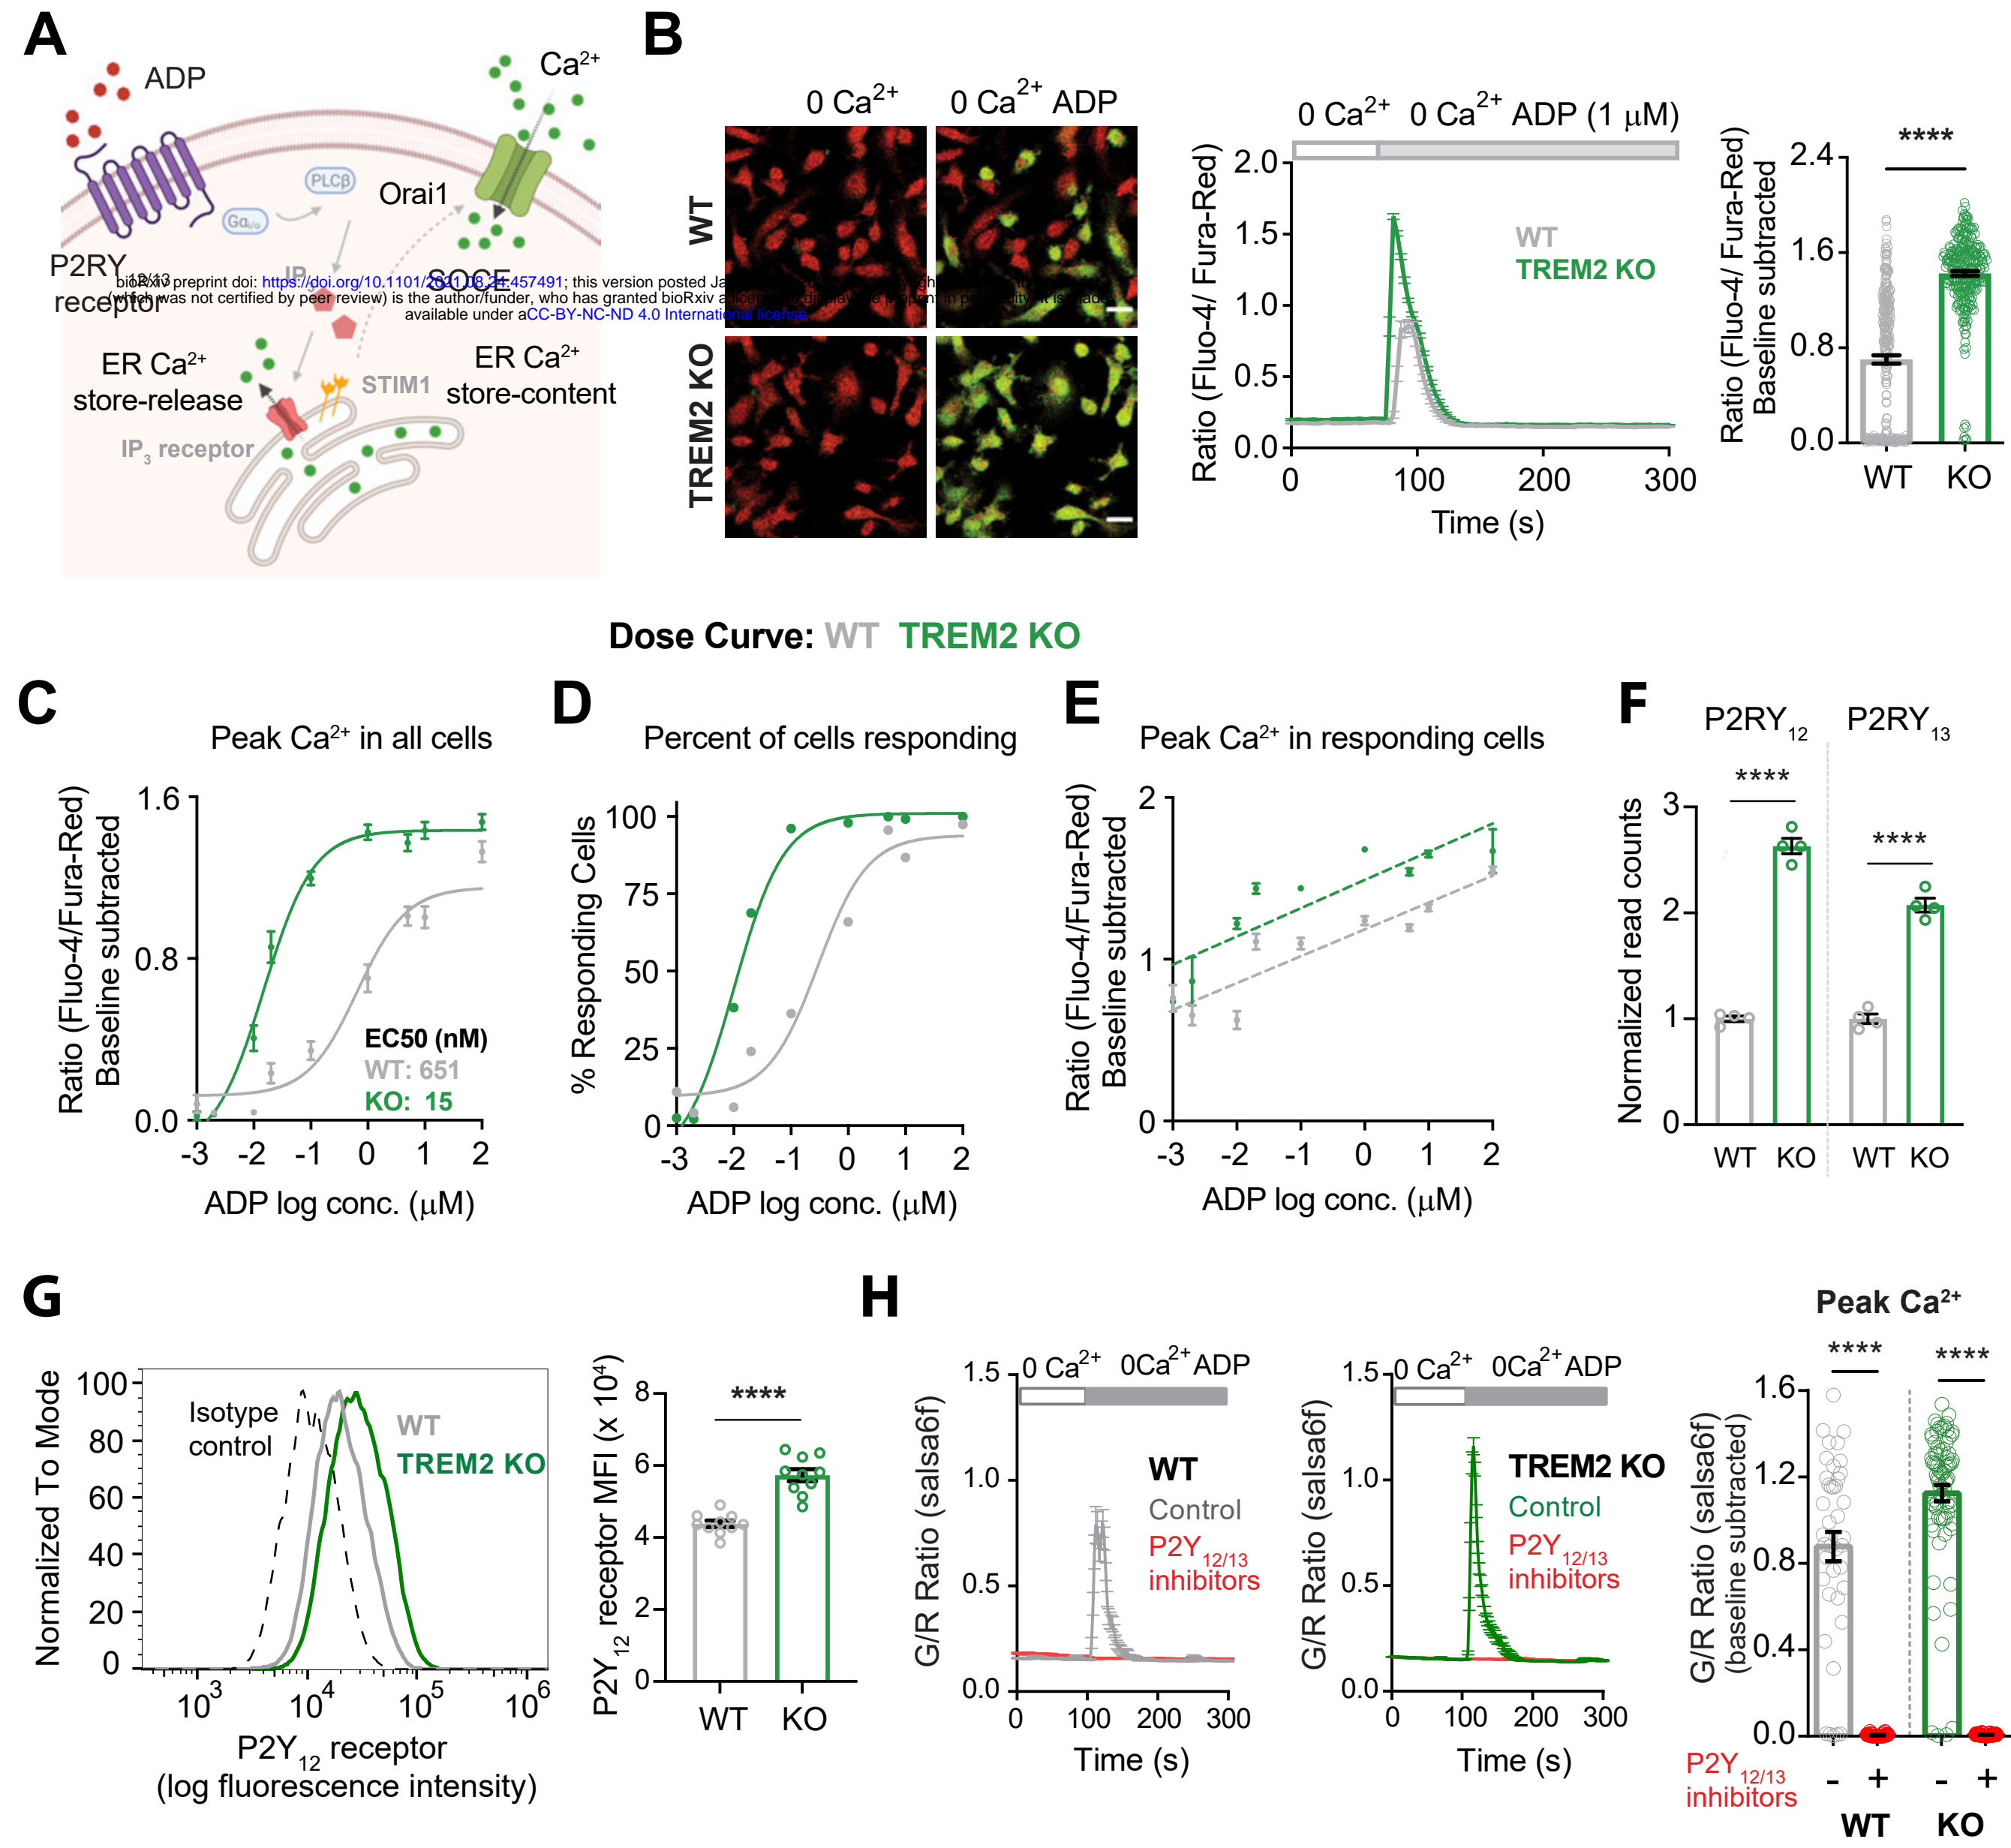

Figure 2-figure supplement 1

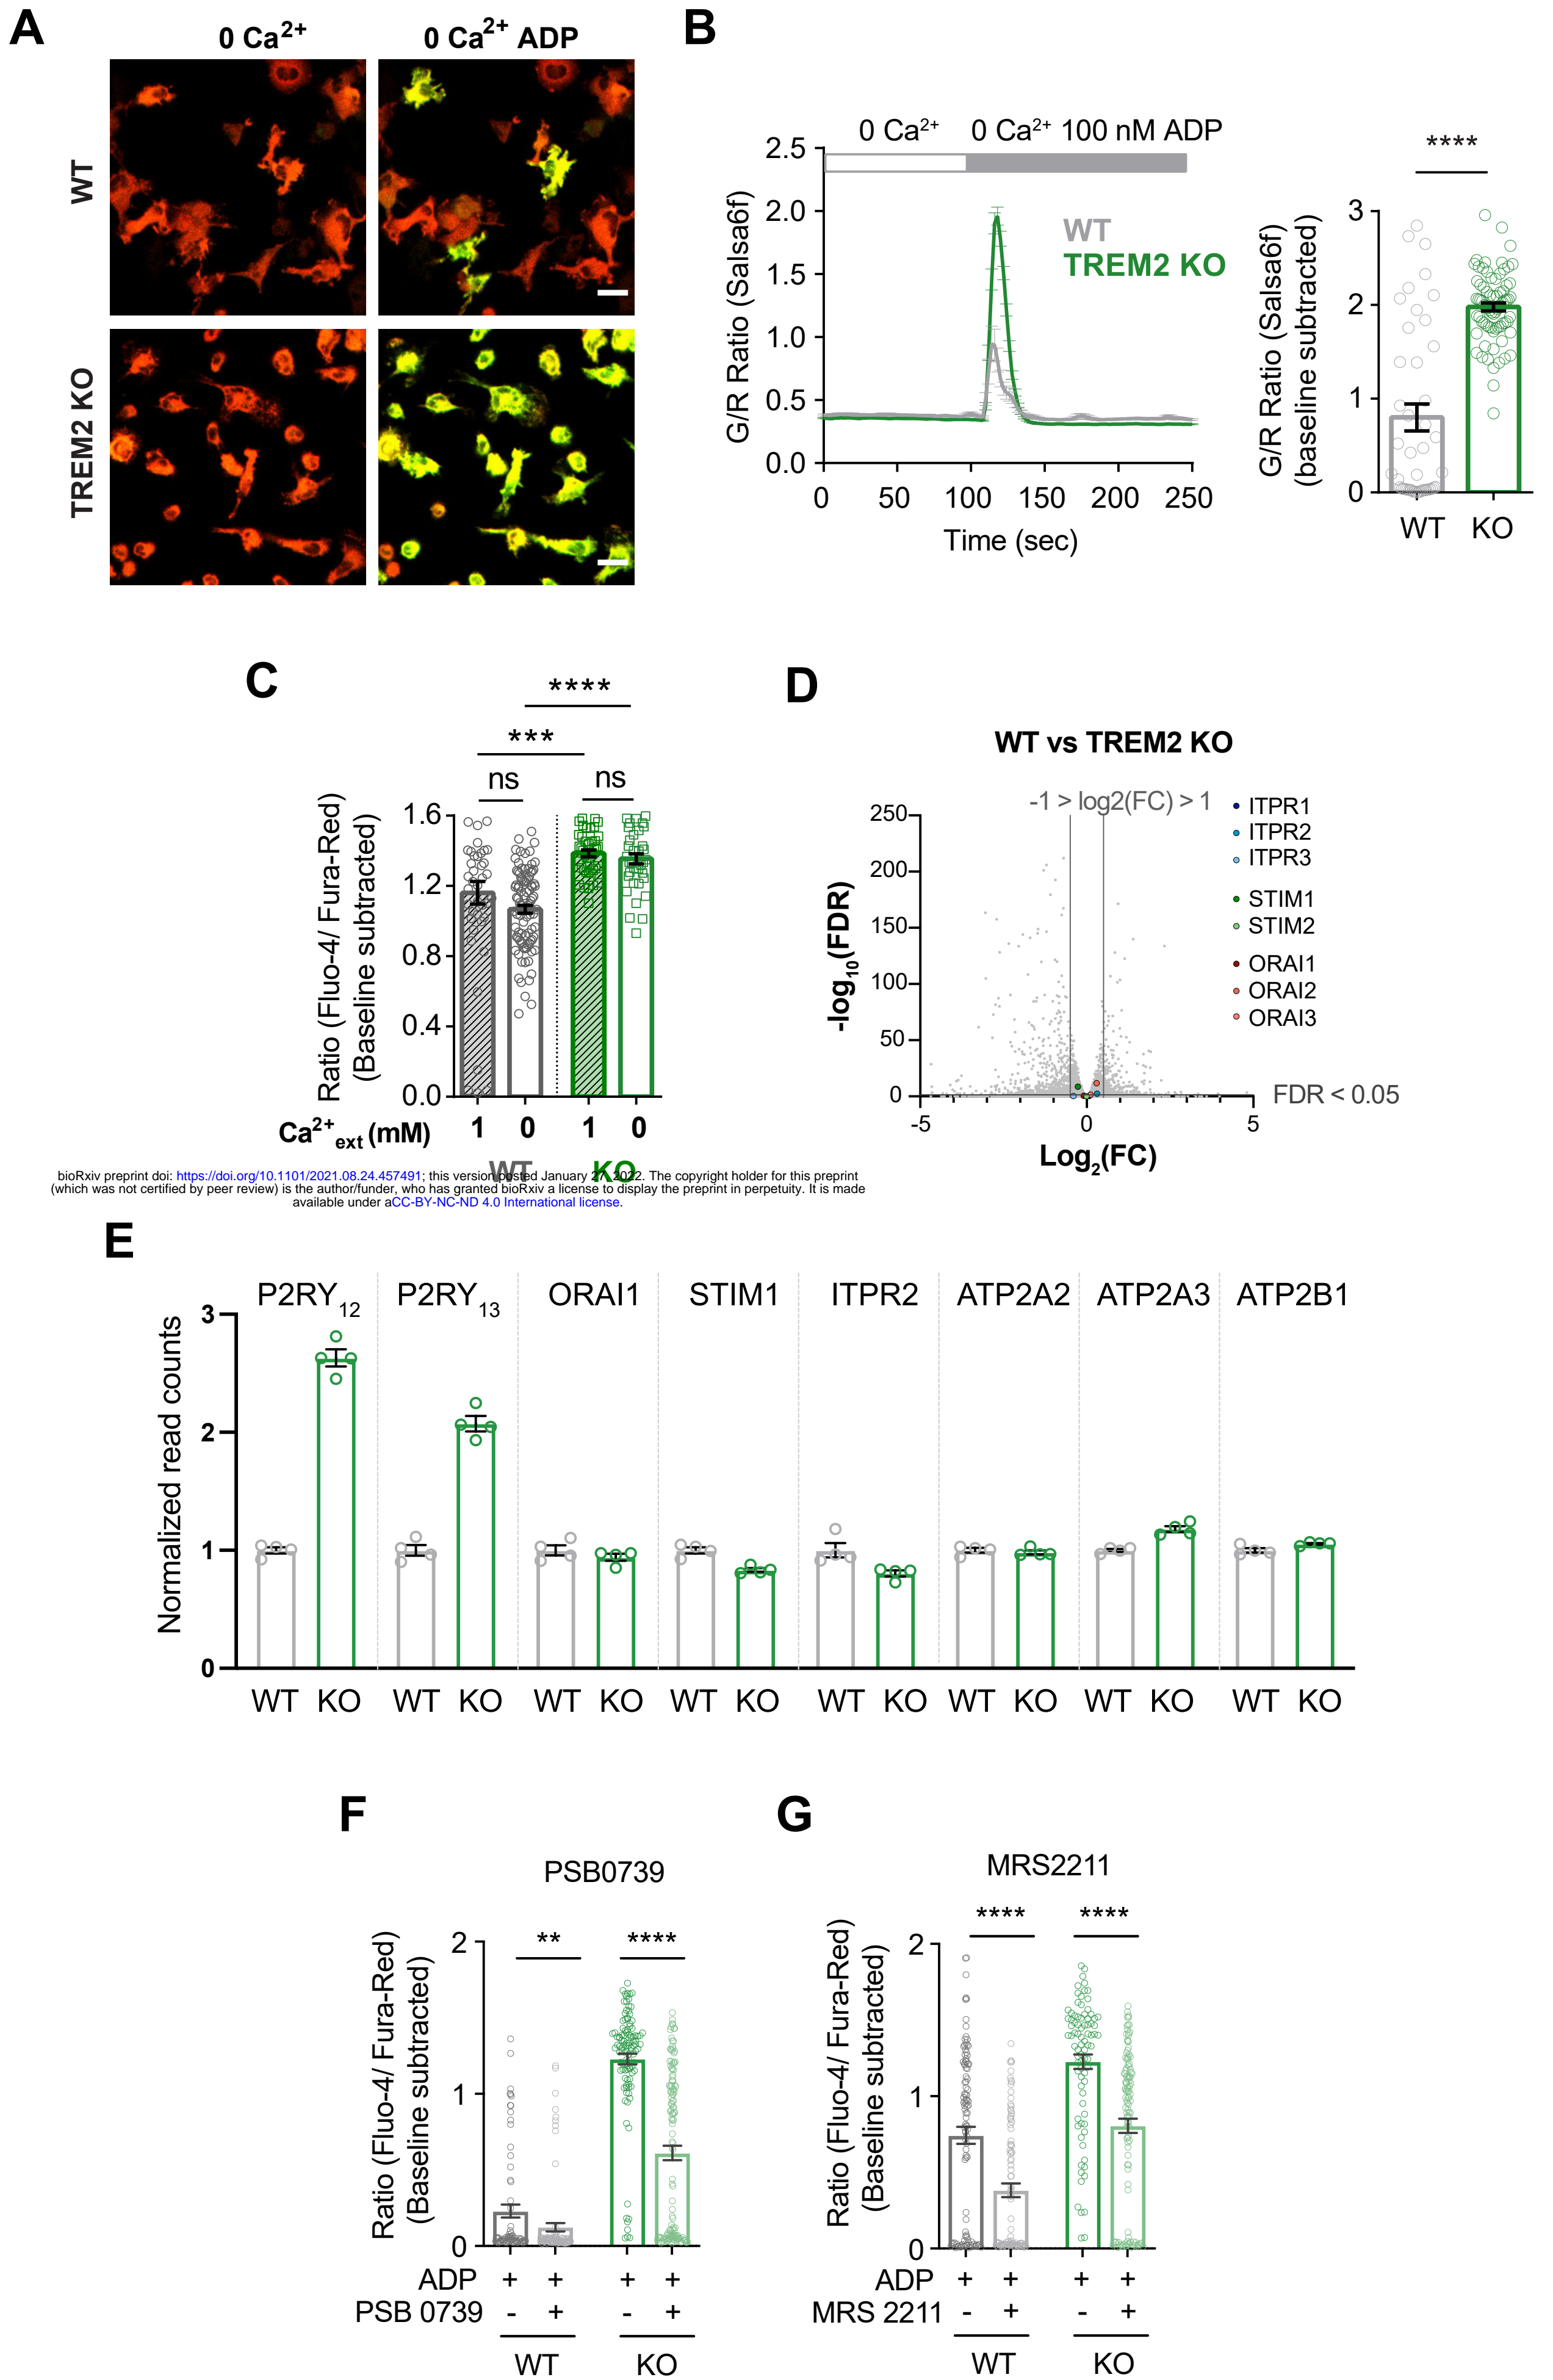

**Figure 3**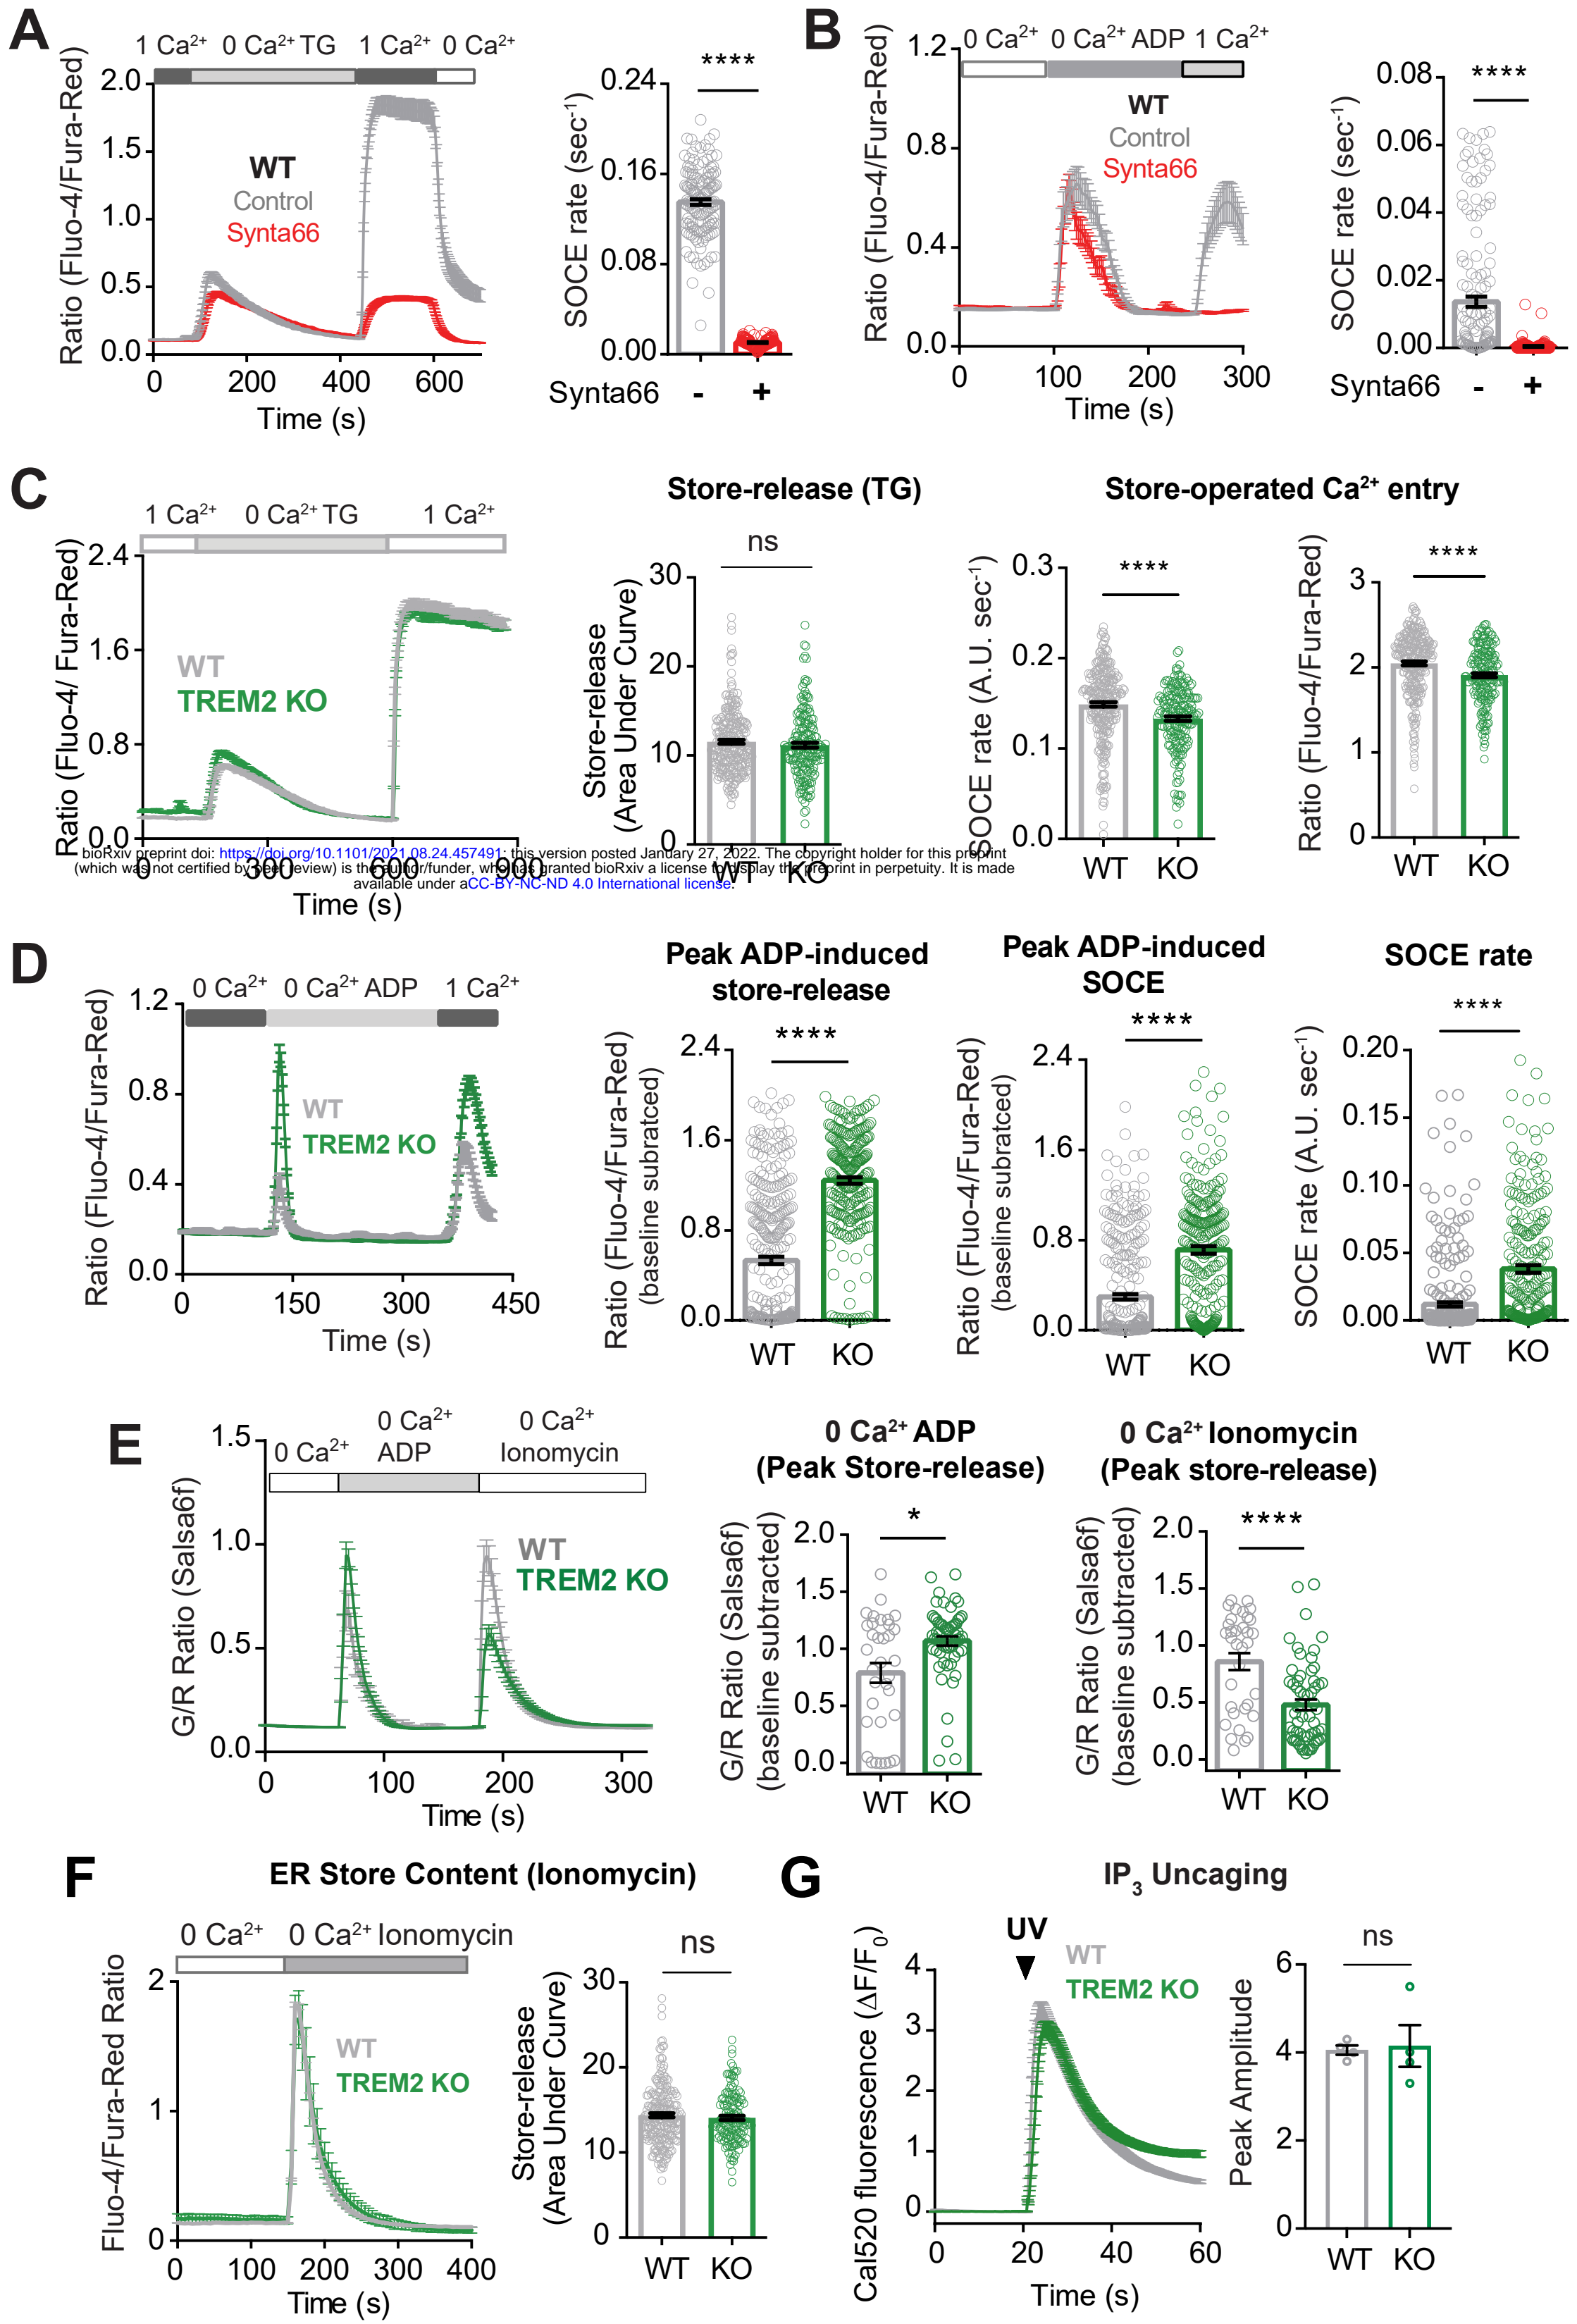

# Figure 3-figure supplement 1

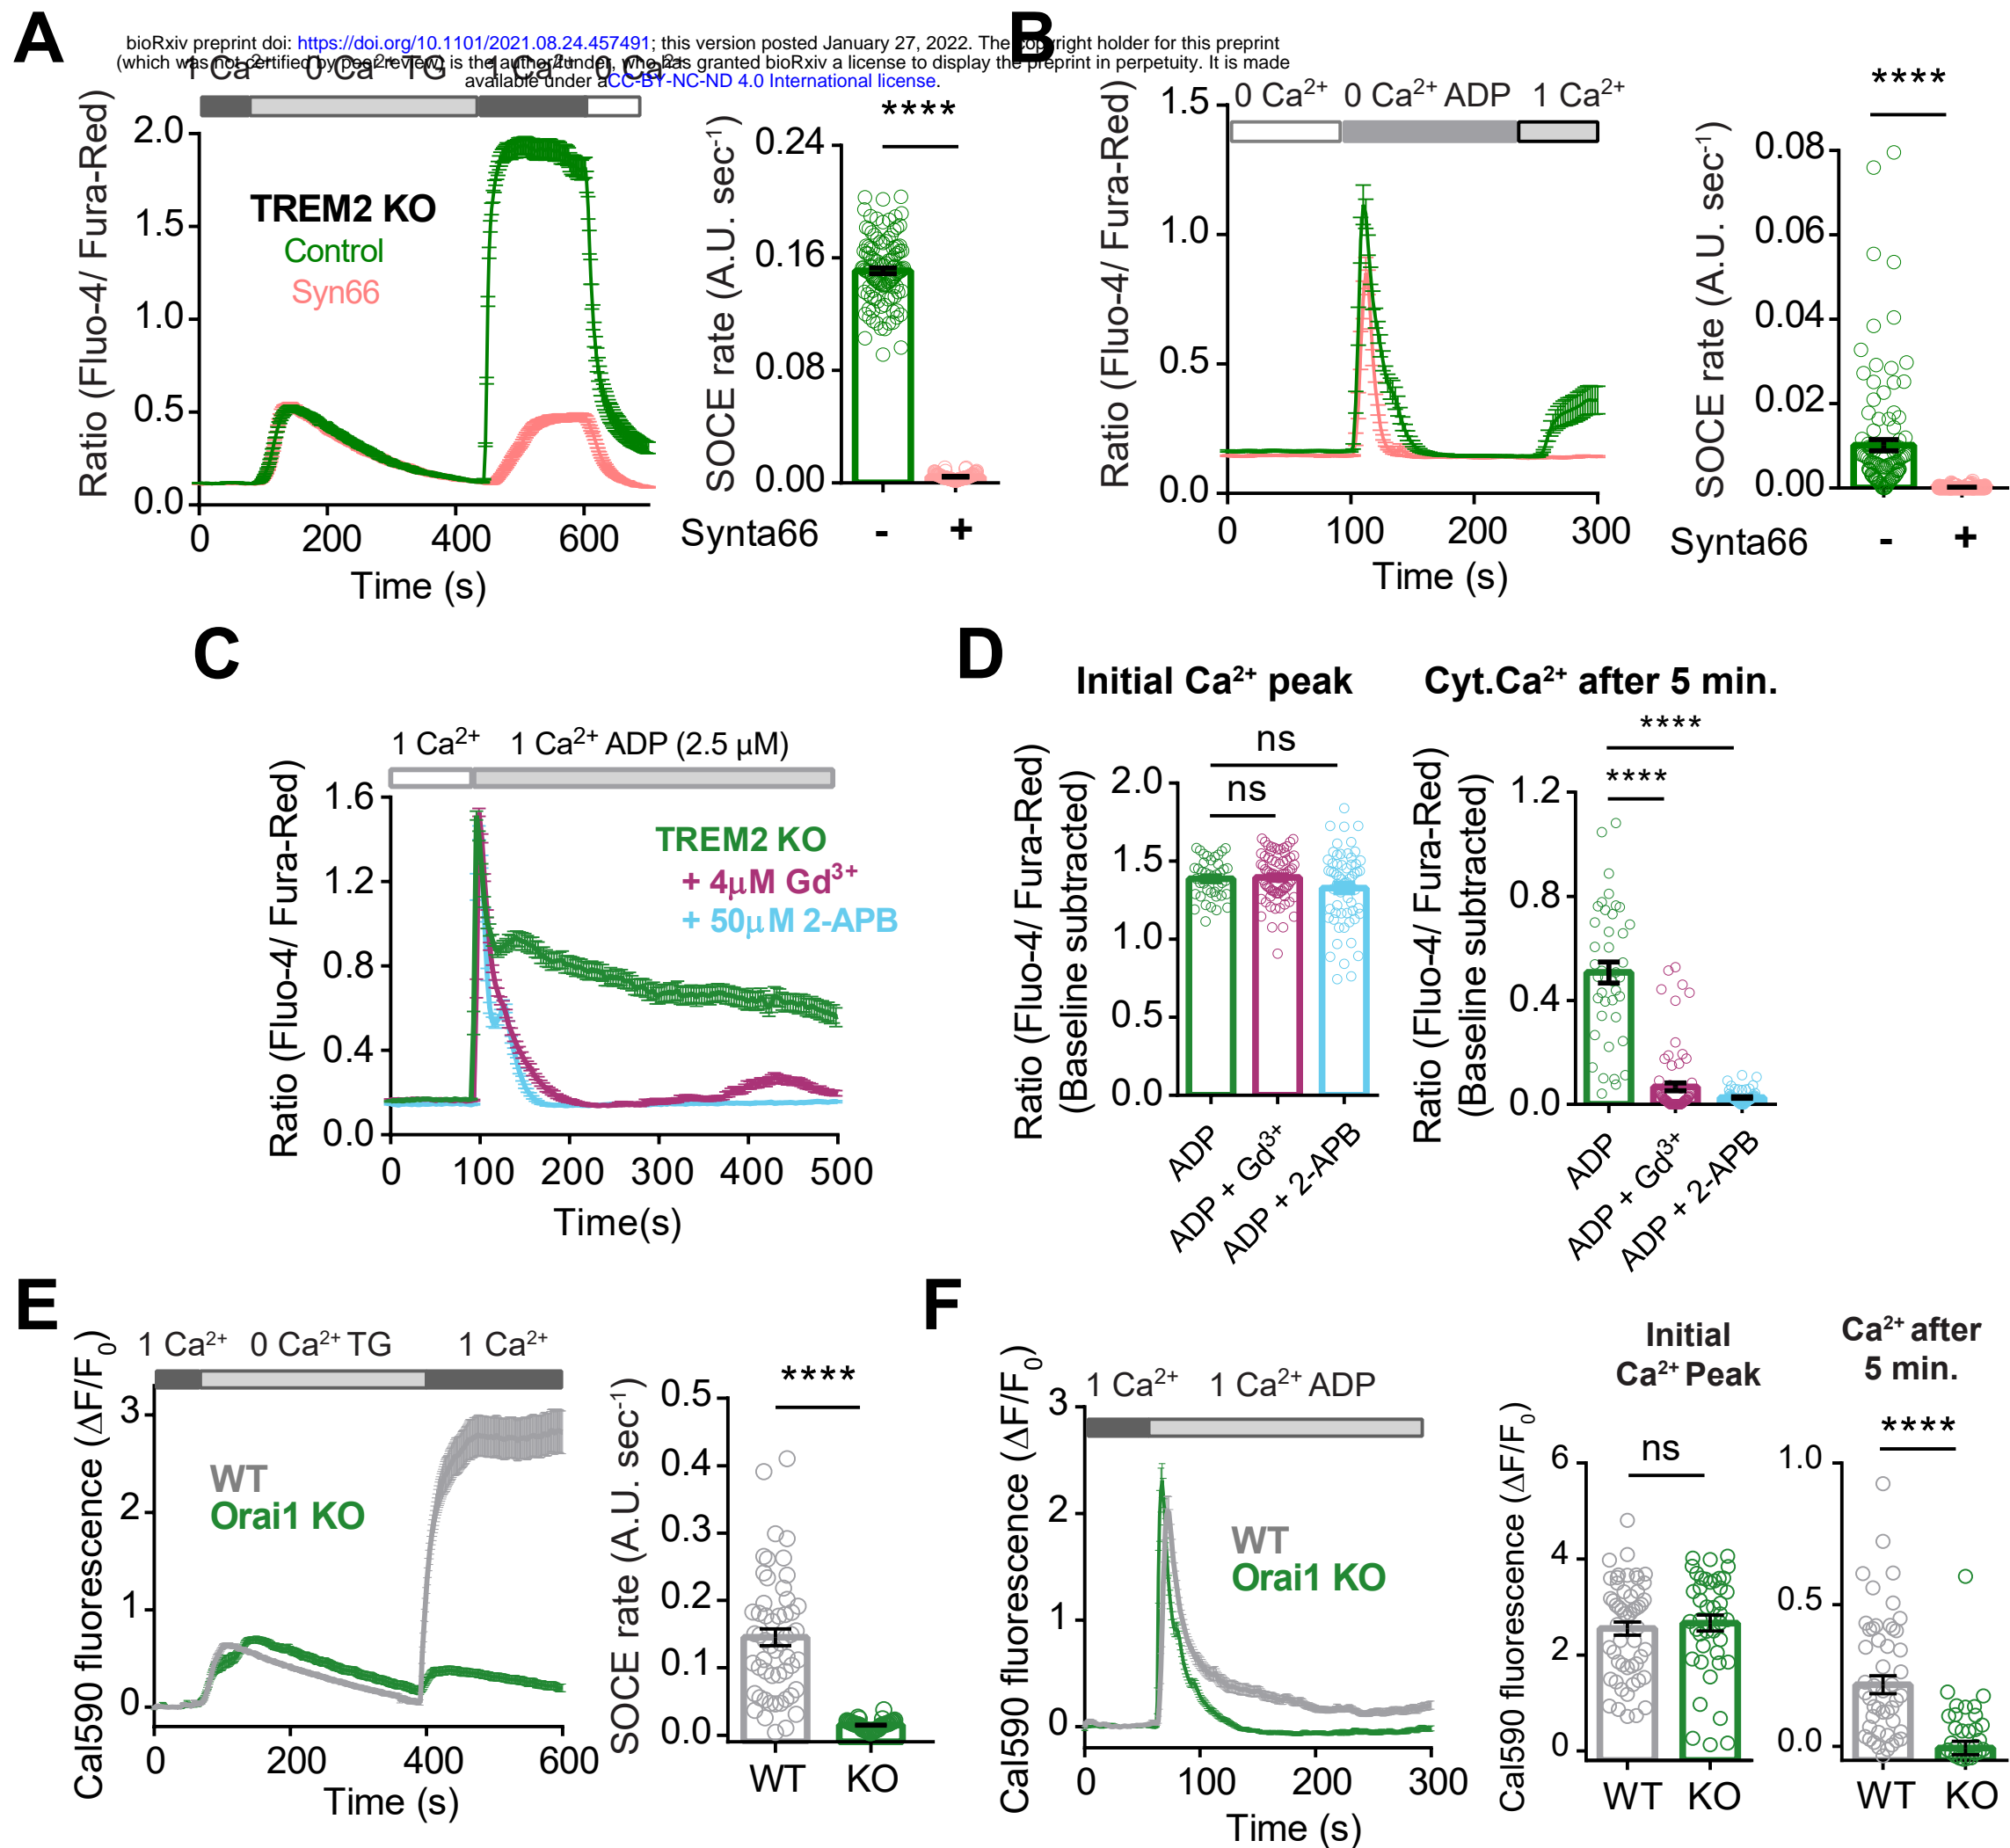



# Figure 3-figure supplement 2

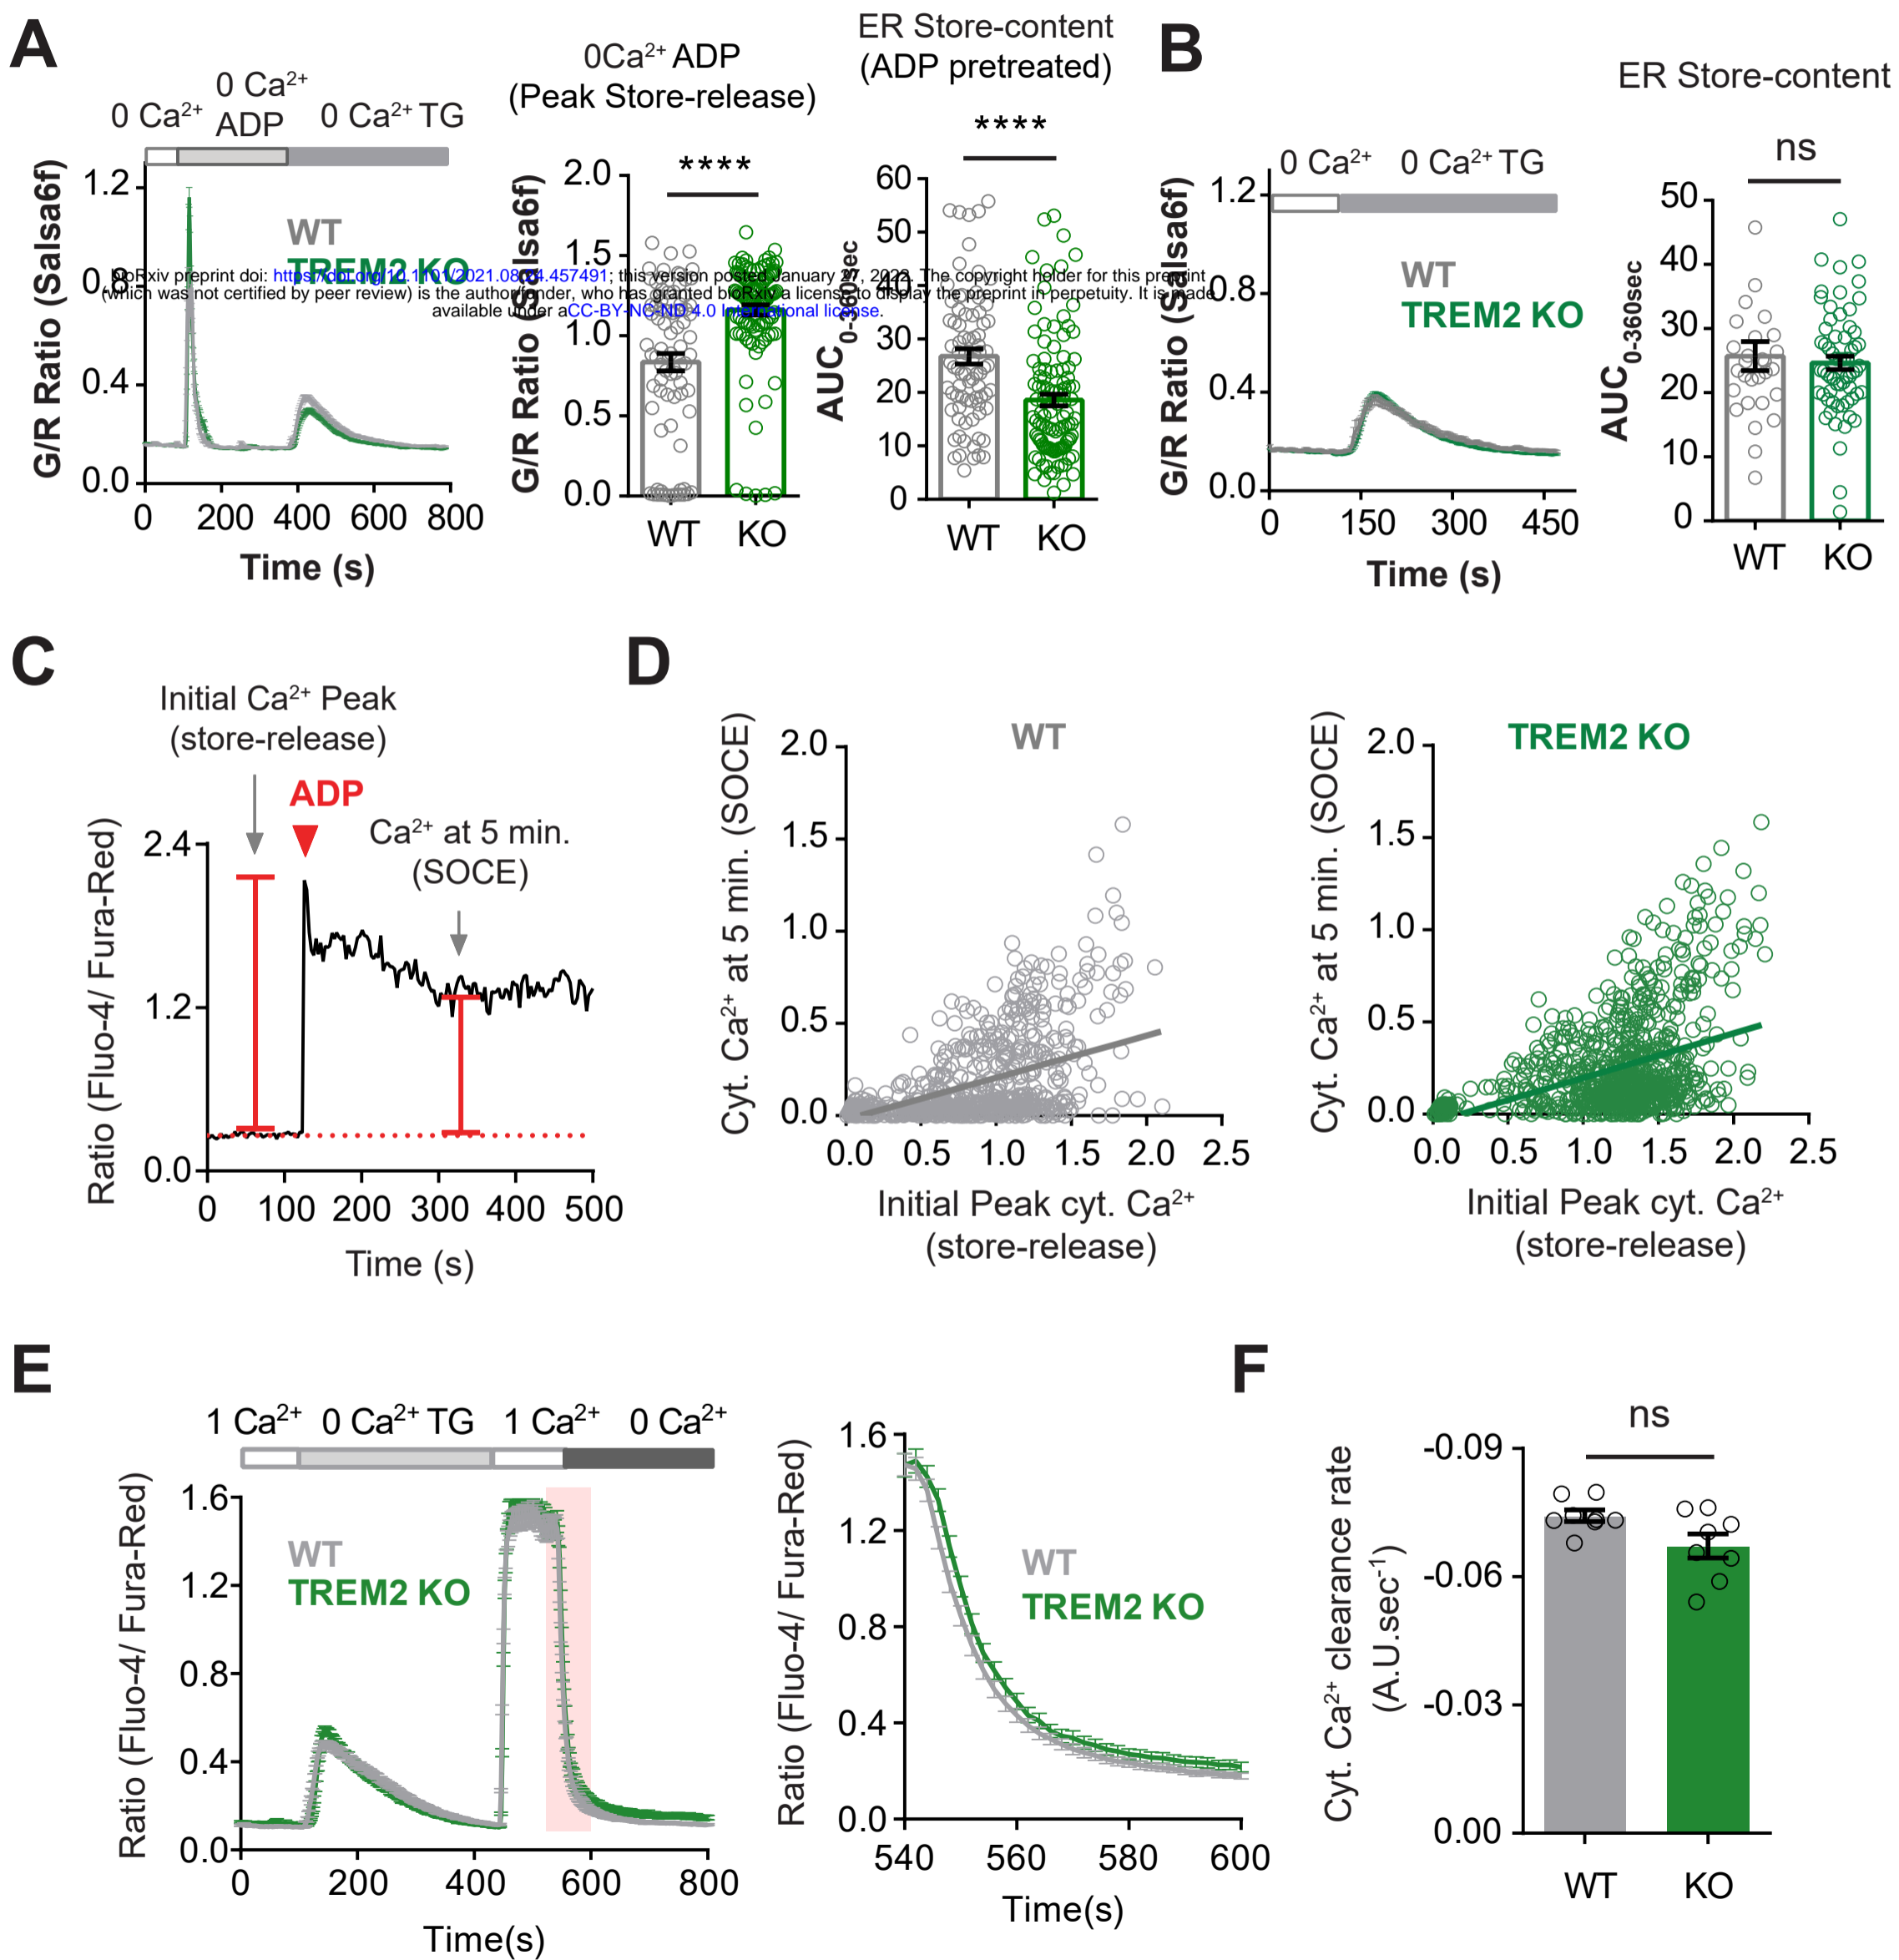

**Figure 4**

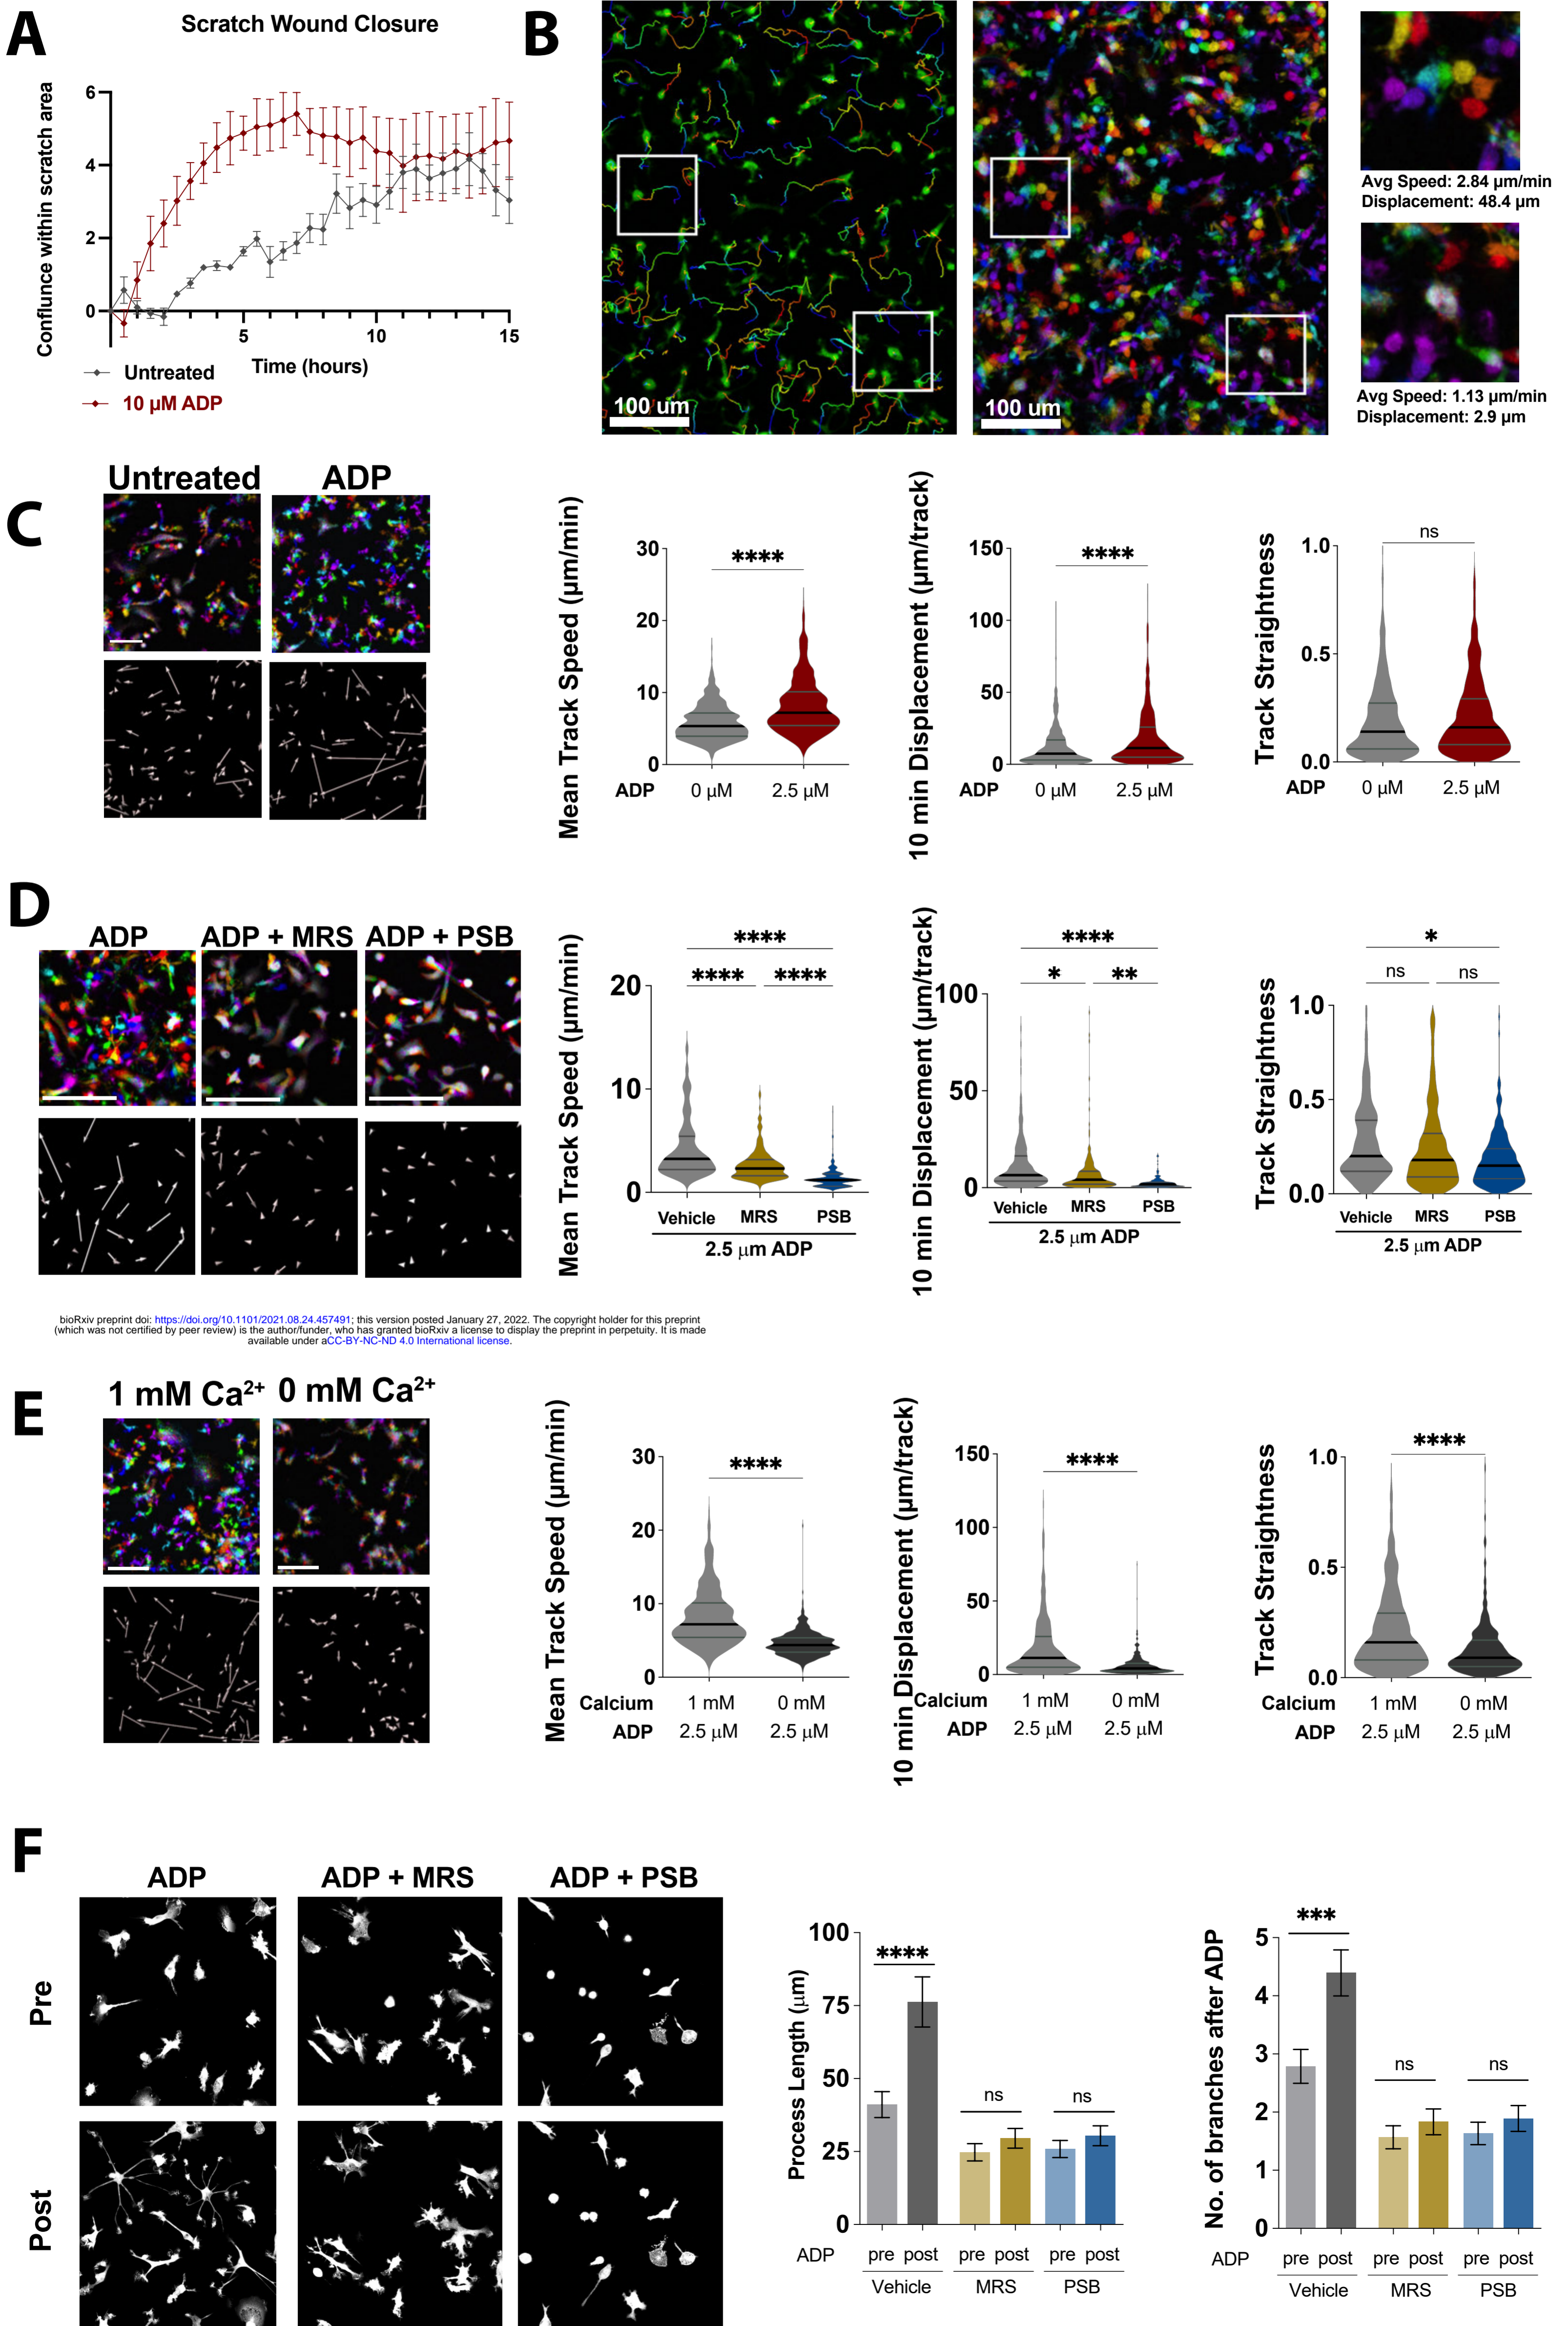

# Figure 4- figure supplement 1

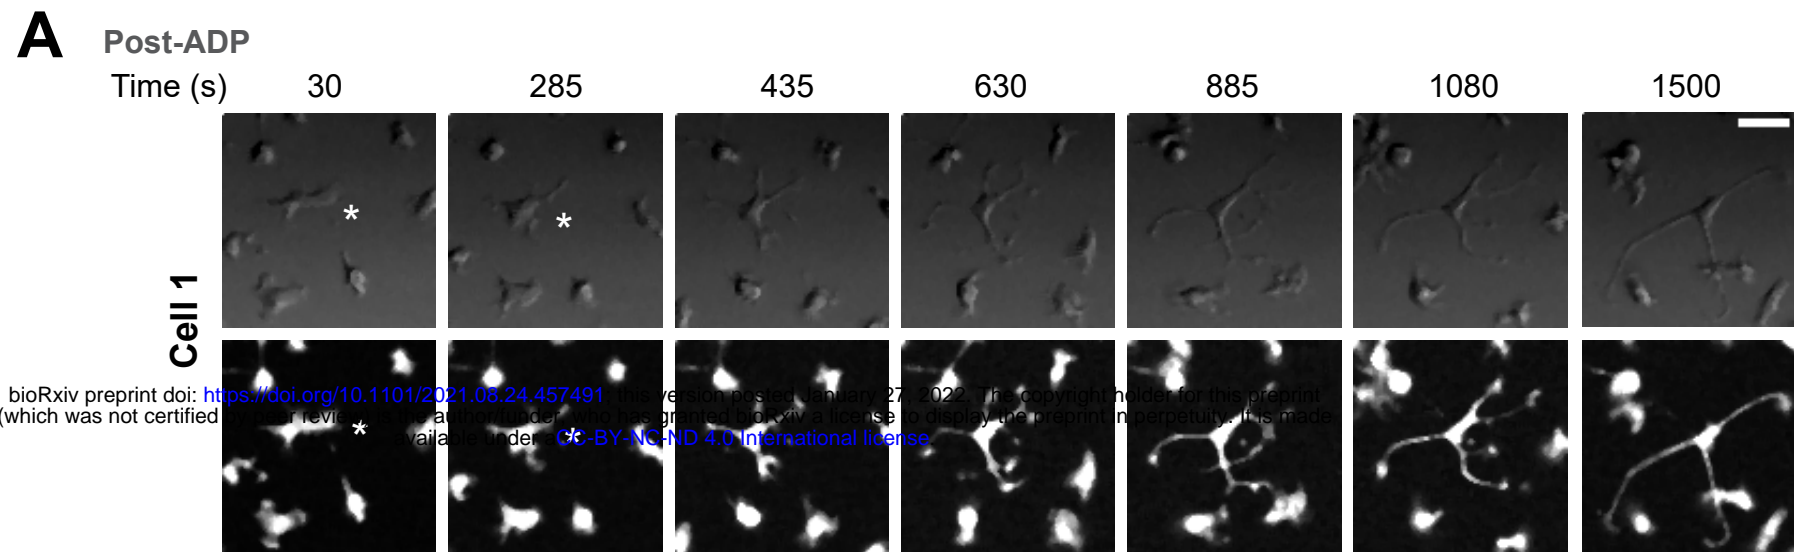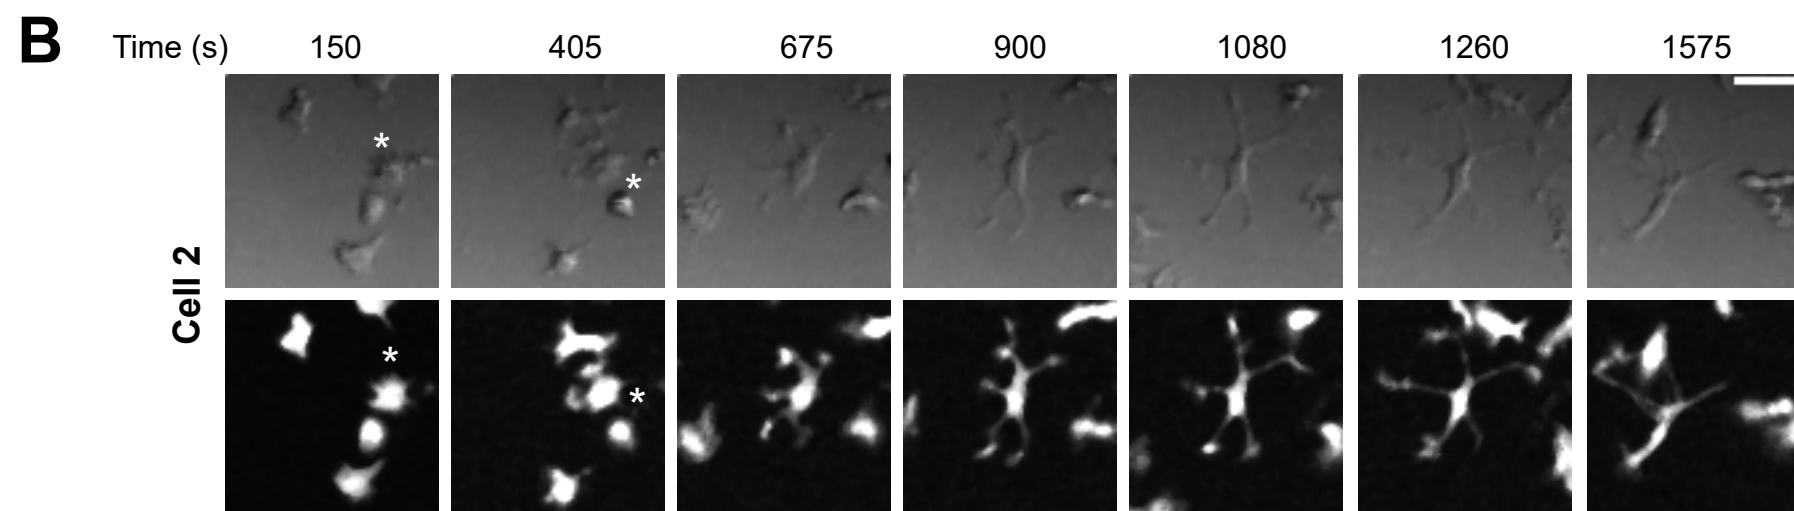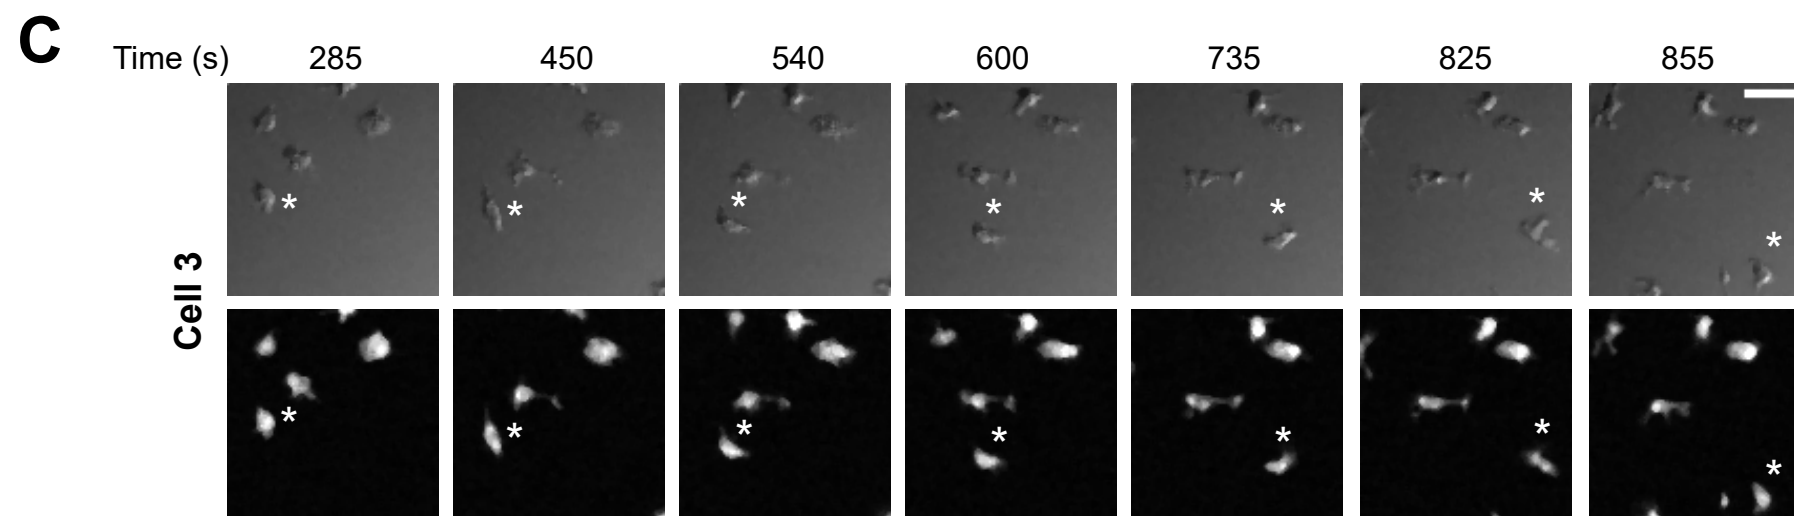

Figure 5

1 mM Calcium 2.5  $\mu$ M ADP Motility

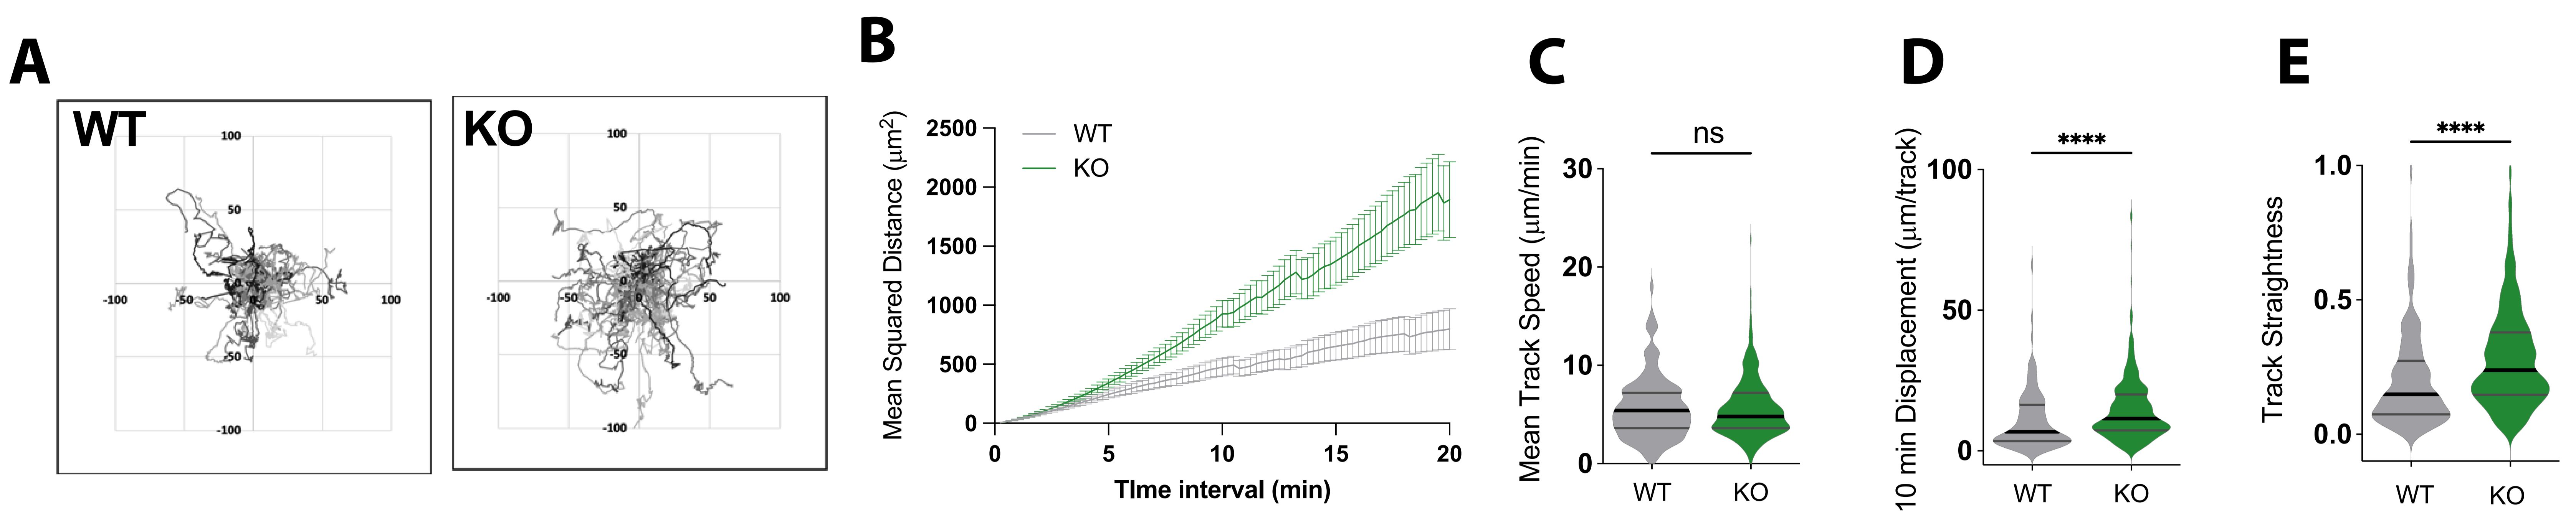

0 mM Calcium 2.5  $\mu$ M ADP Motility

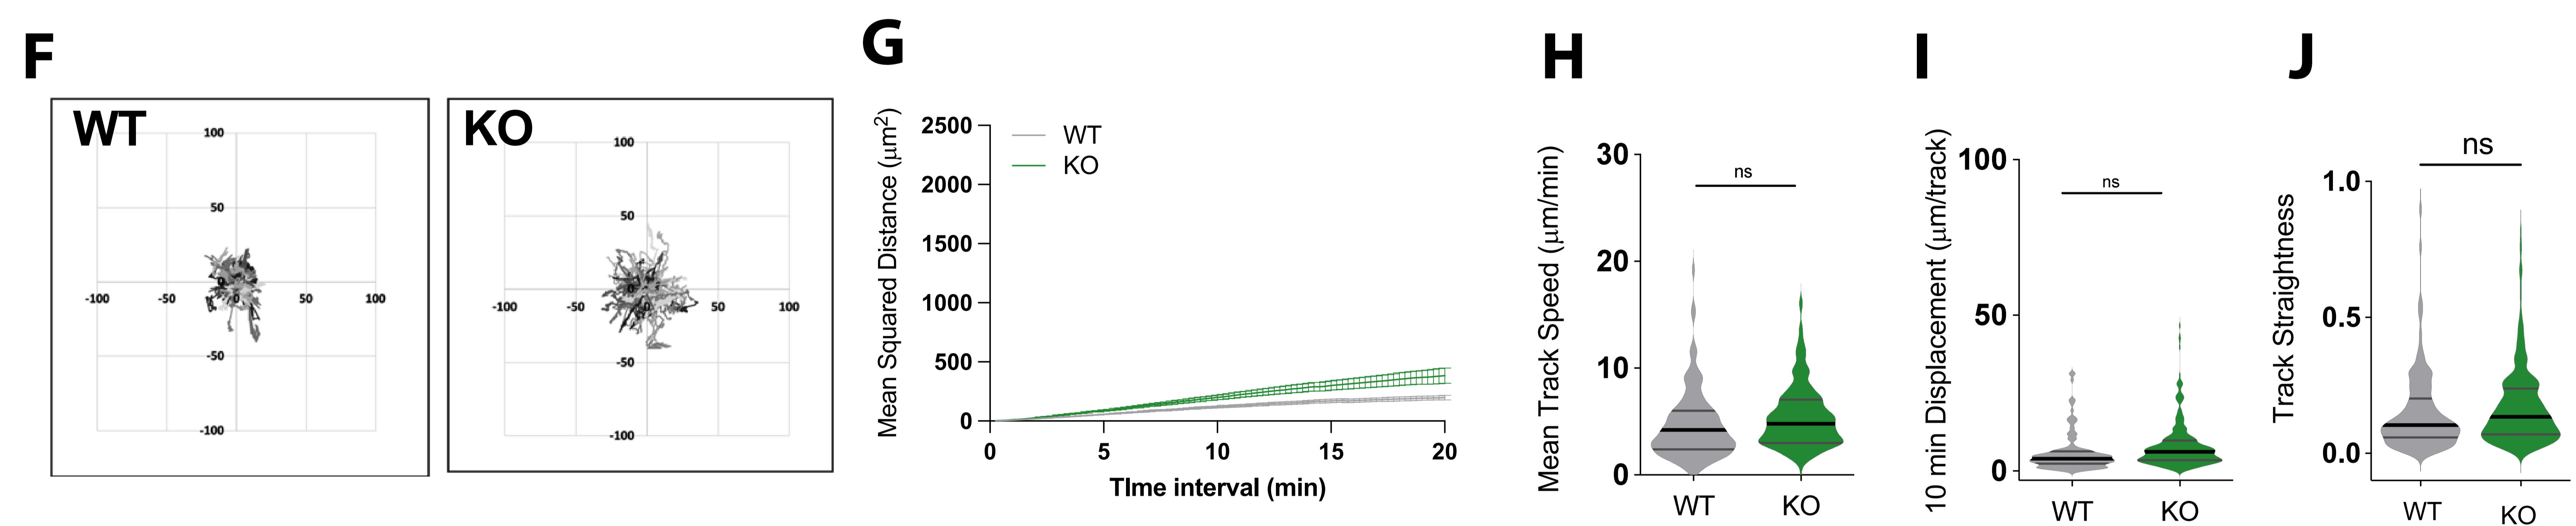

1 mM Calcium 2.5  $\mu$ M ADP Process Extension

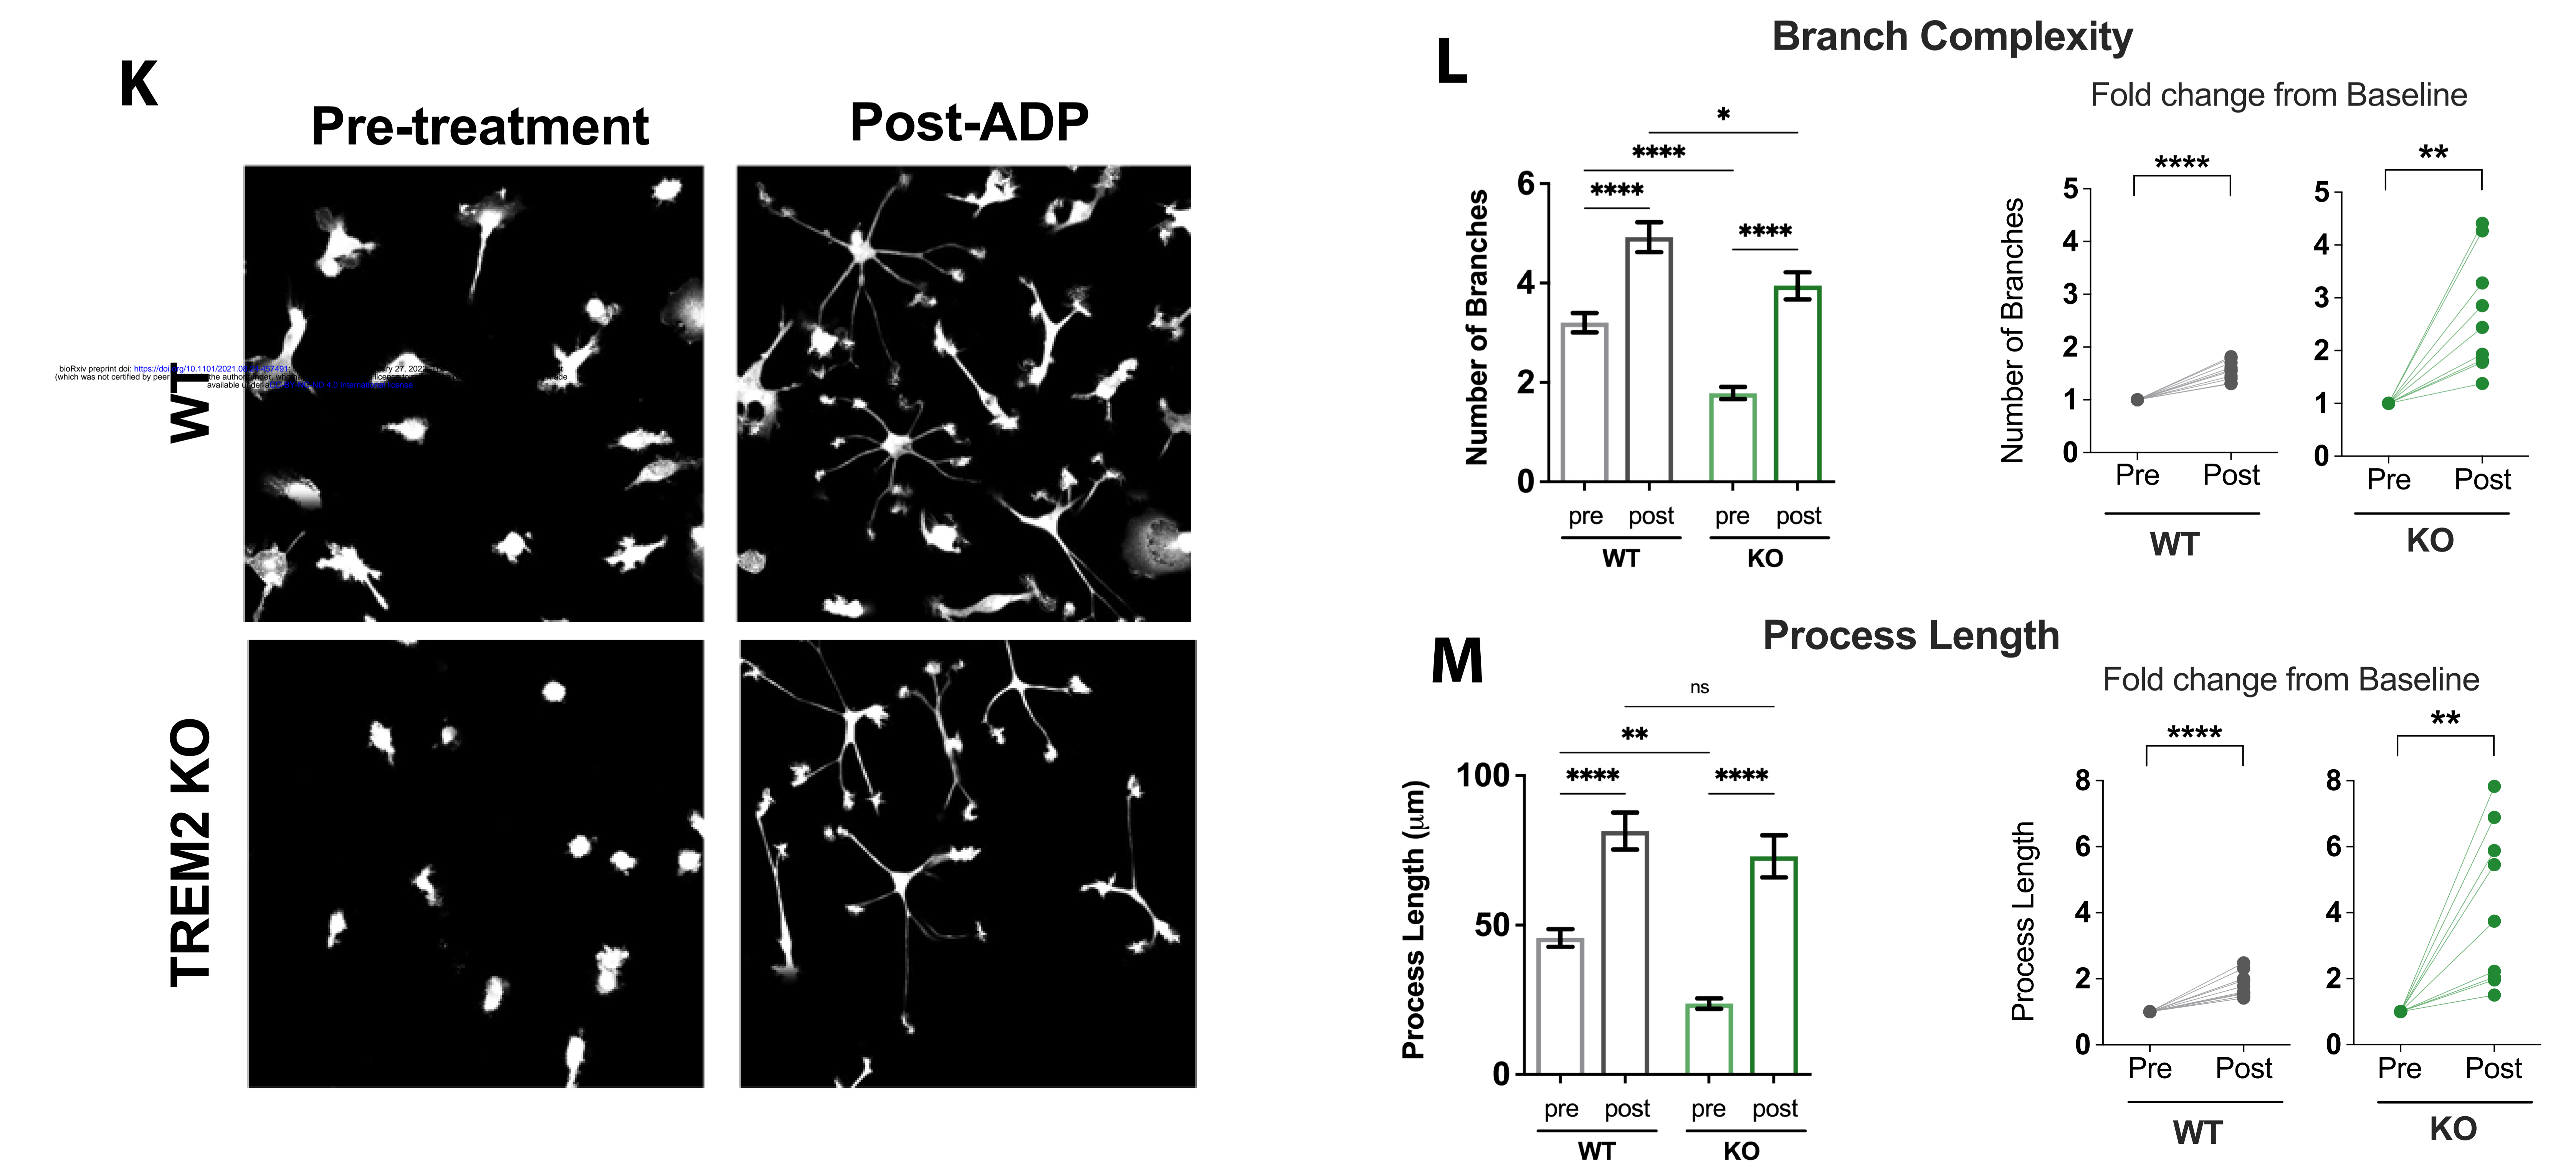

# Figure 5-figure supplement 1

## A

1 mM Calcium 0 uM ADP Baseline Motility

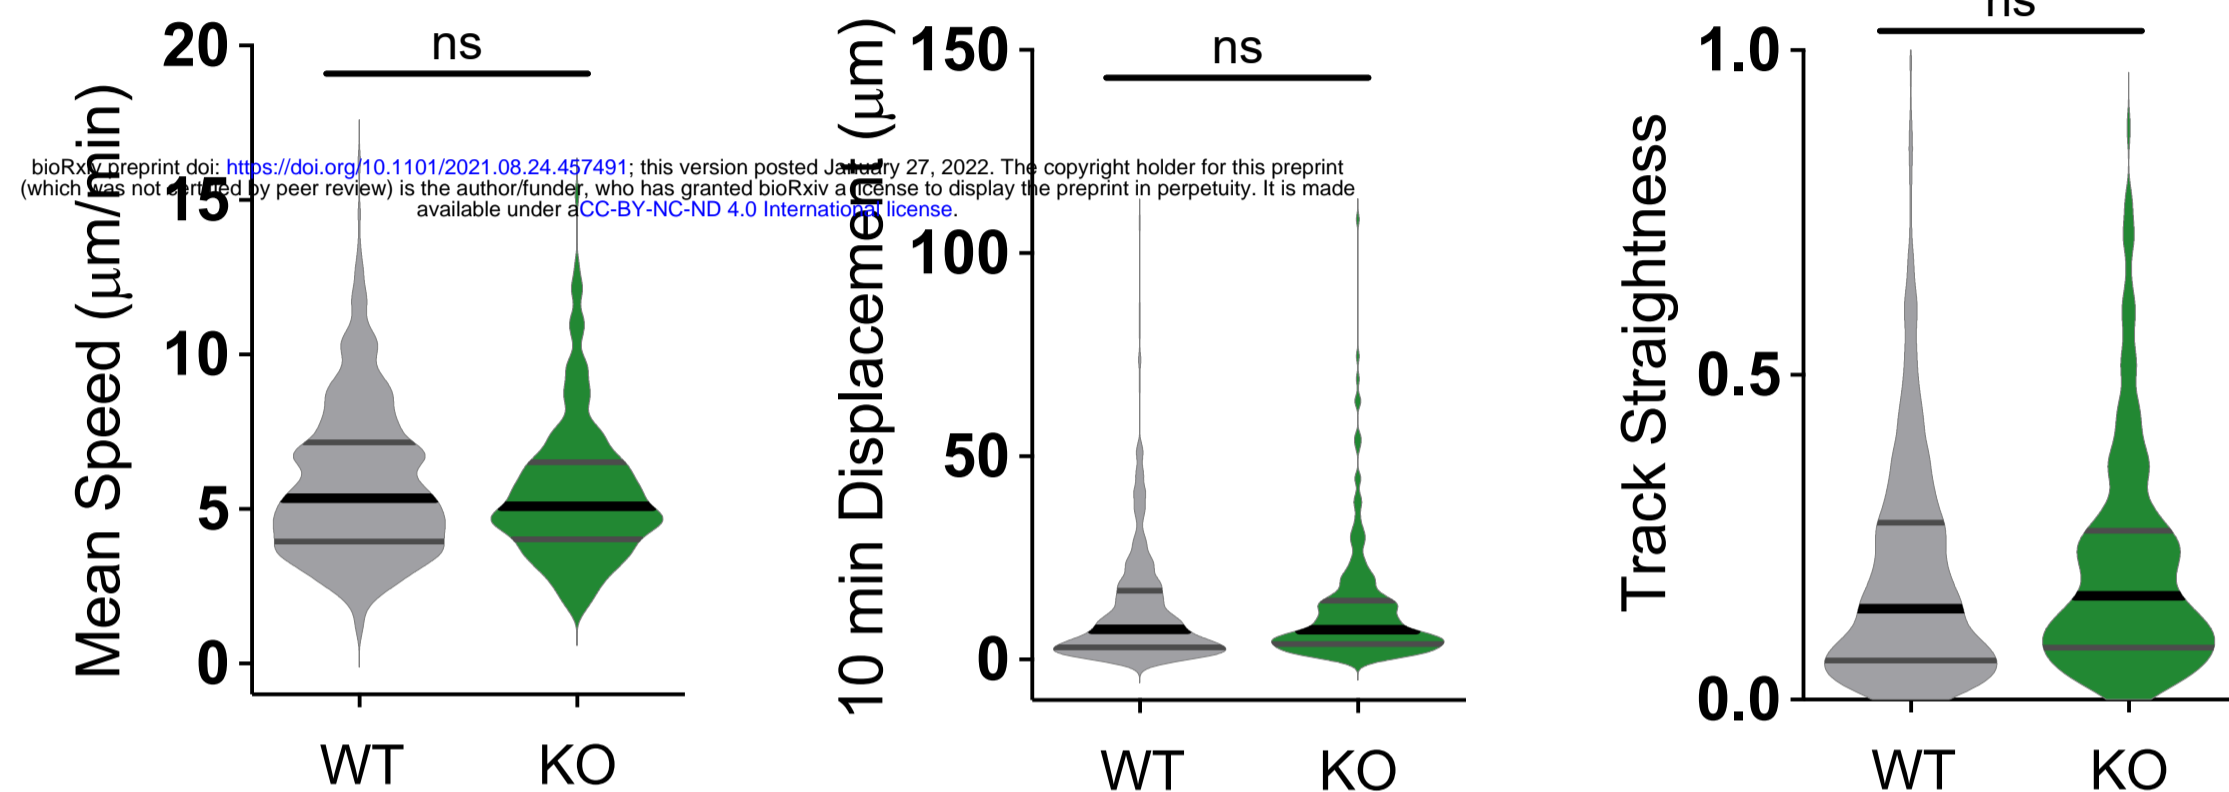

## B

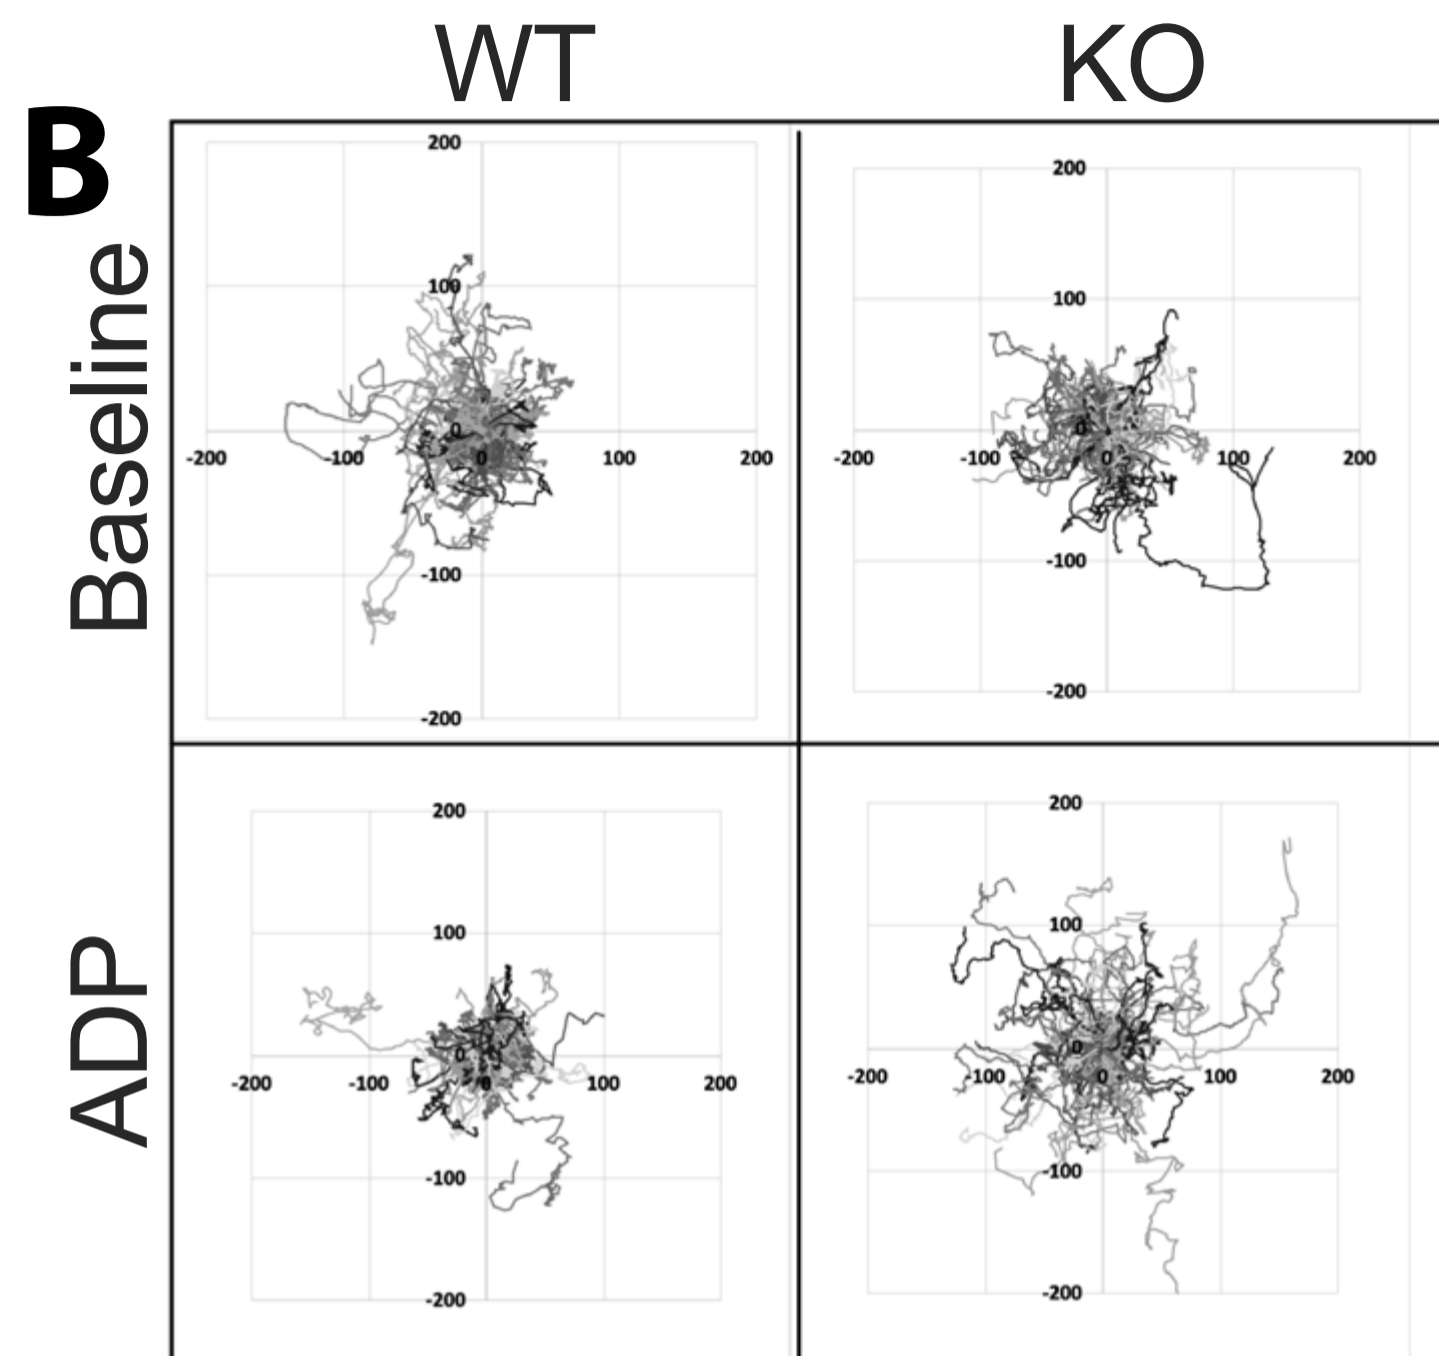

Directional Autocorrelation

## C

Directional Autocorrelation

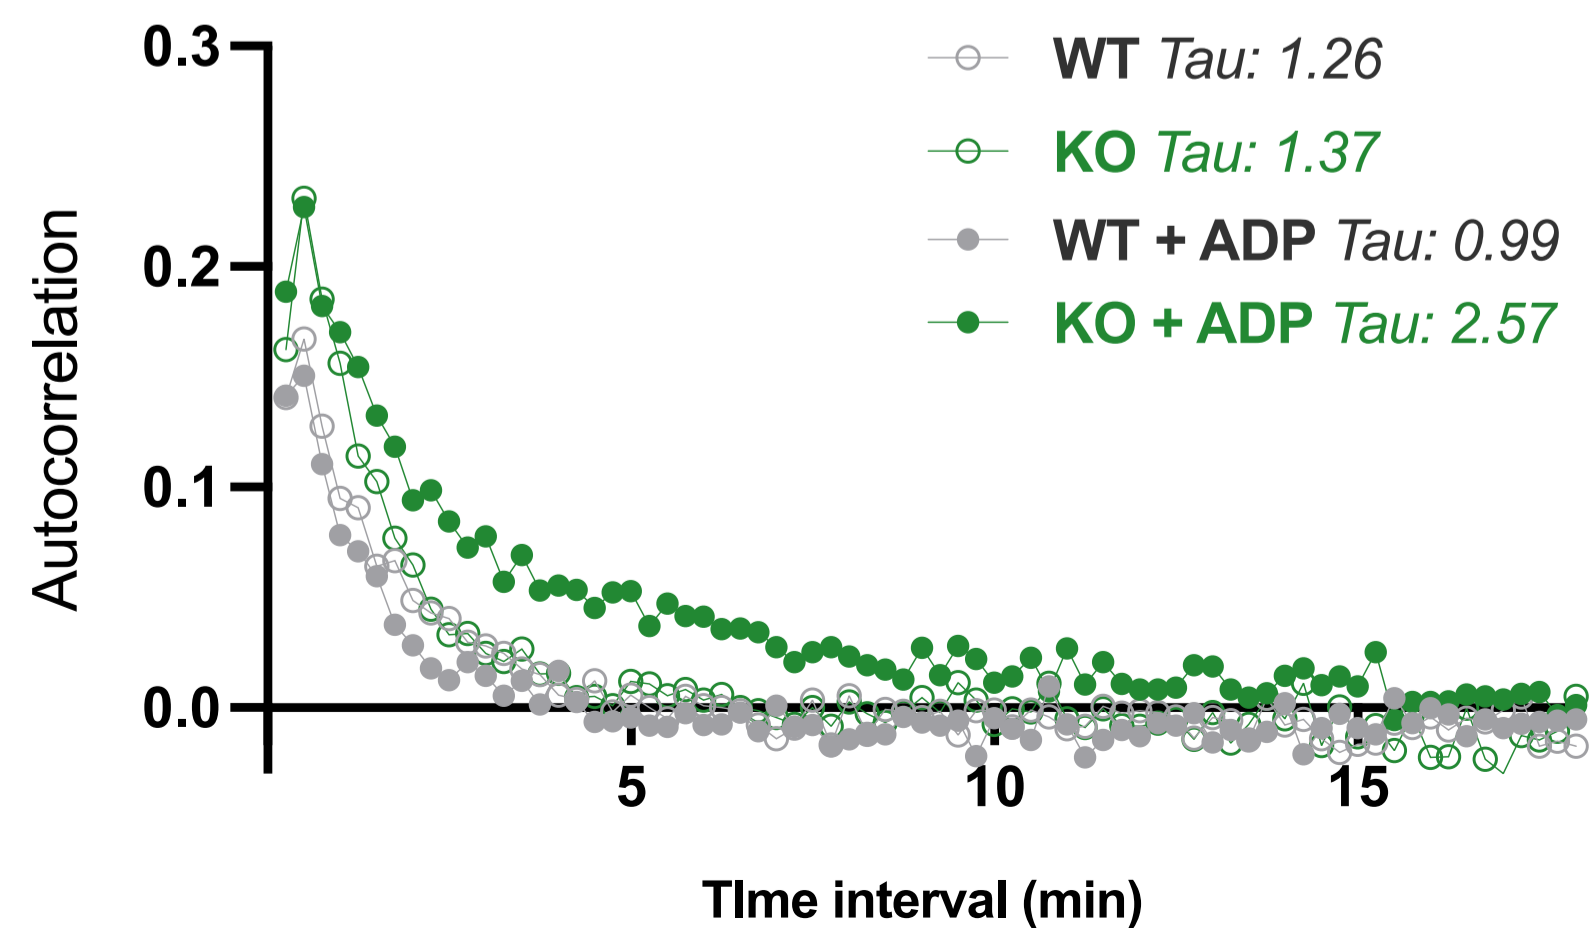

## D

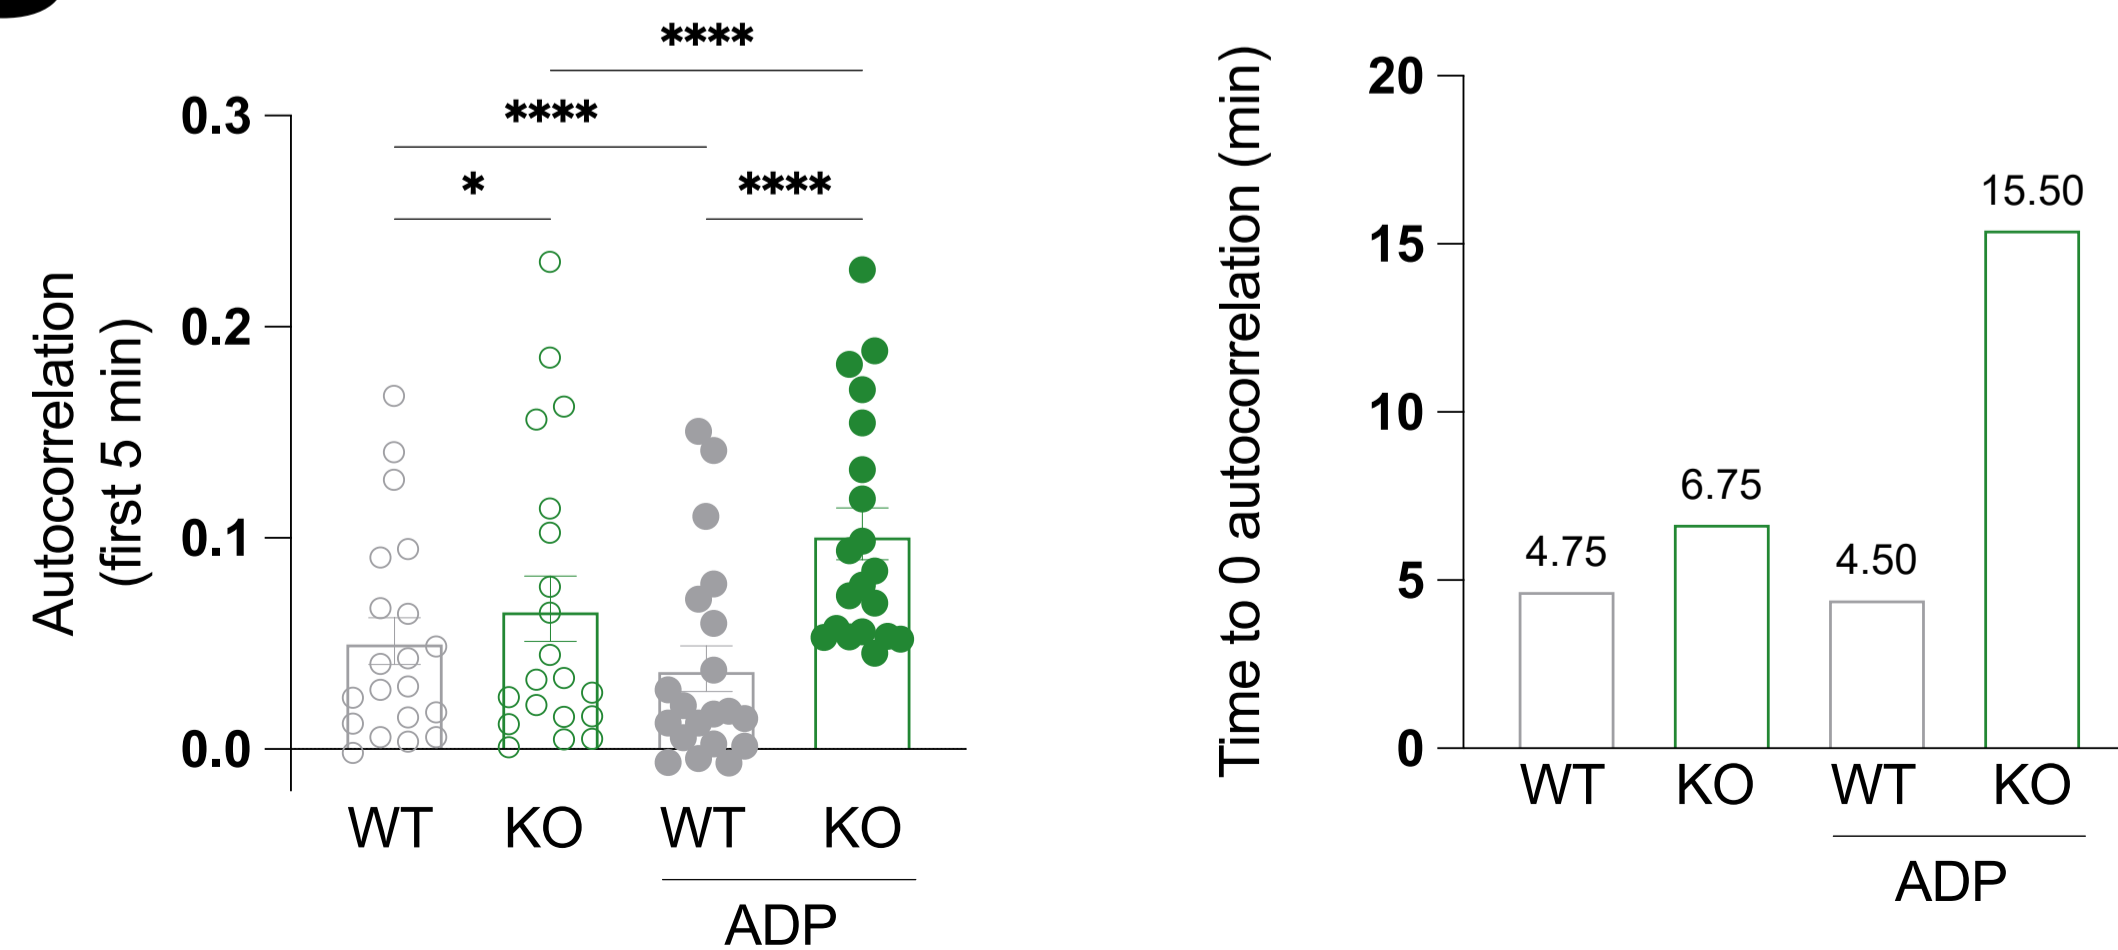

# Figure 5-figure supplement 2

bioRxiv preprint doi: <https://doi.org/10.1101/2021.08.24.457491>; this version posted January 27, 2022. The copyright holder for this preprint (which was not certified by peer review) is the author/funder, who has granted bioRxiv a license to display the preprint in perpetuity. It is made available under aCC-BY-NC-ND 4.0 International license.

## 1 mM Calcium 2.5 $\mu$ M ADP Process Extension

## 0 mM Calcium 2.5 $\mu$ M ADP Process Extension

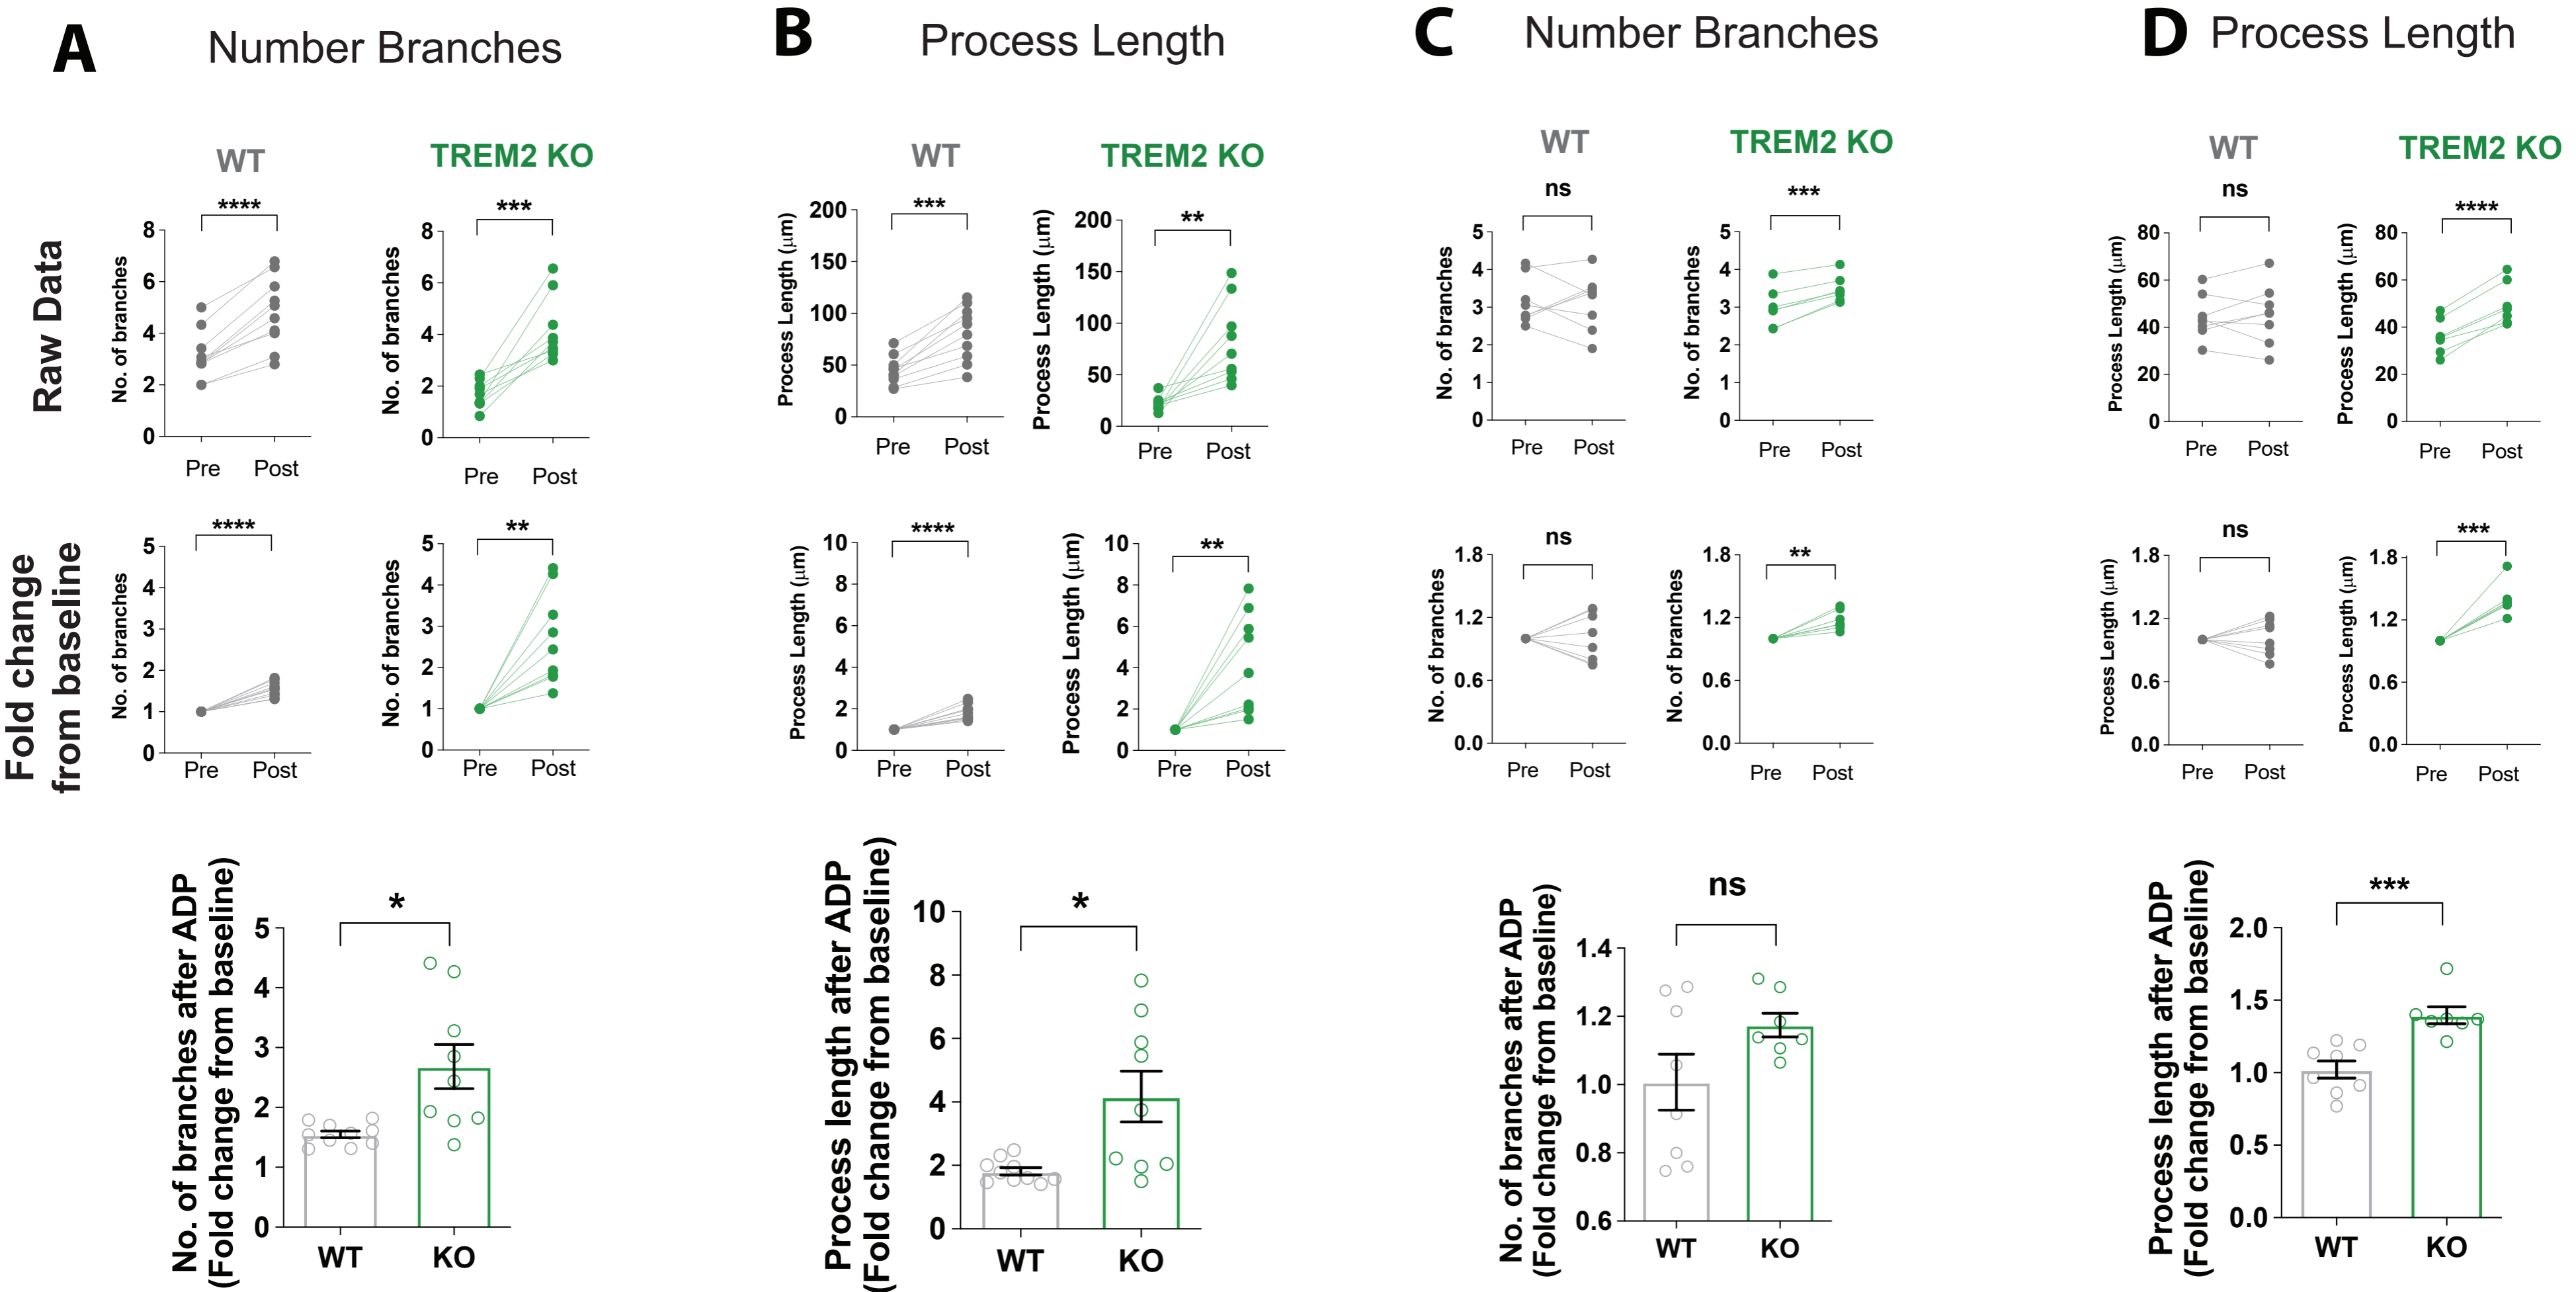

# Figure 6

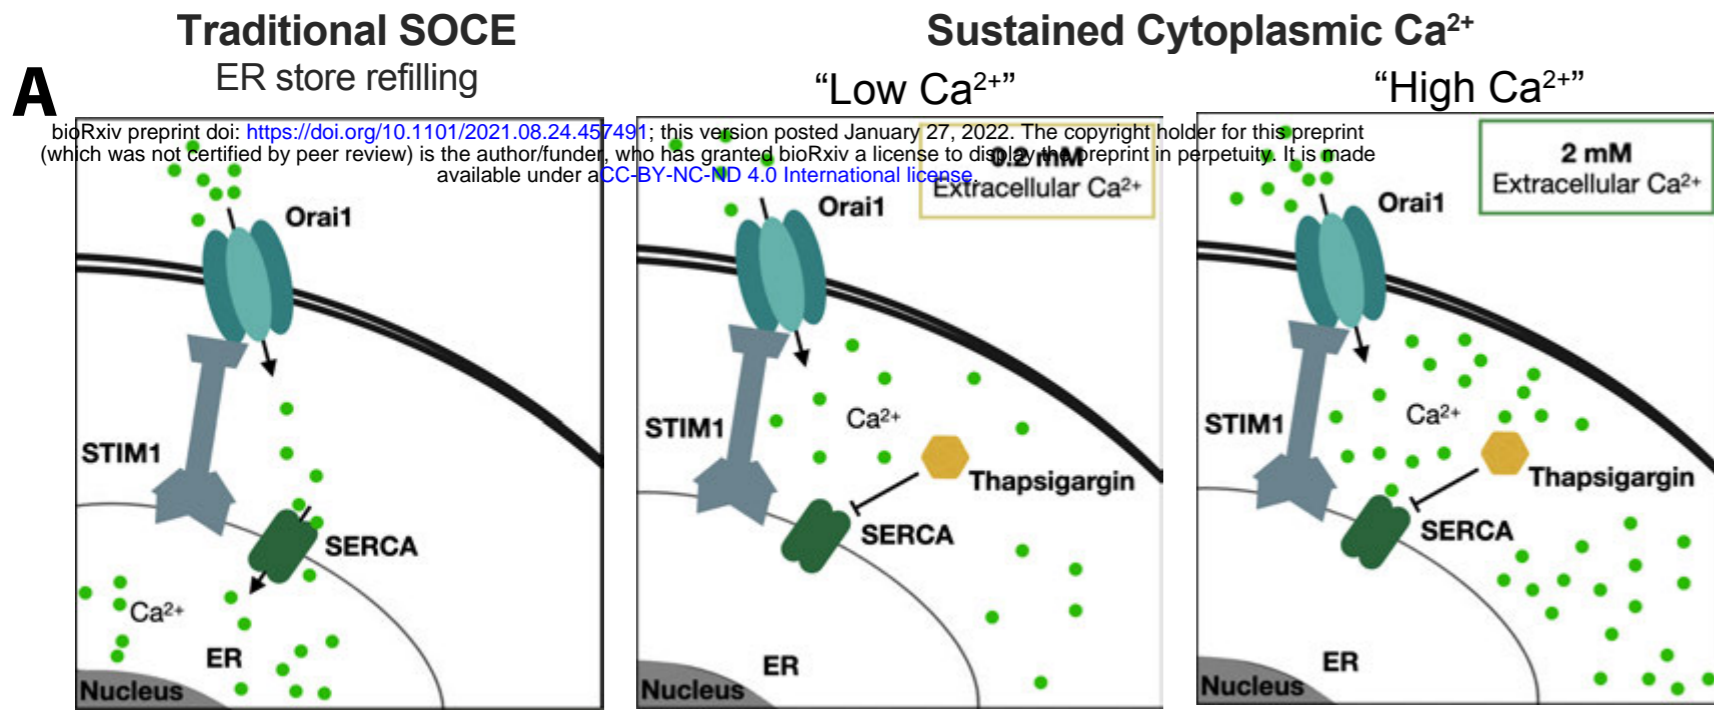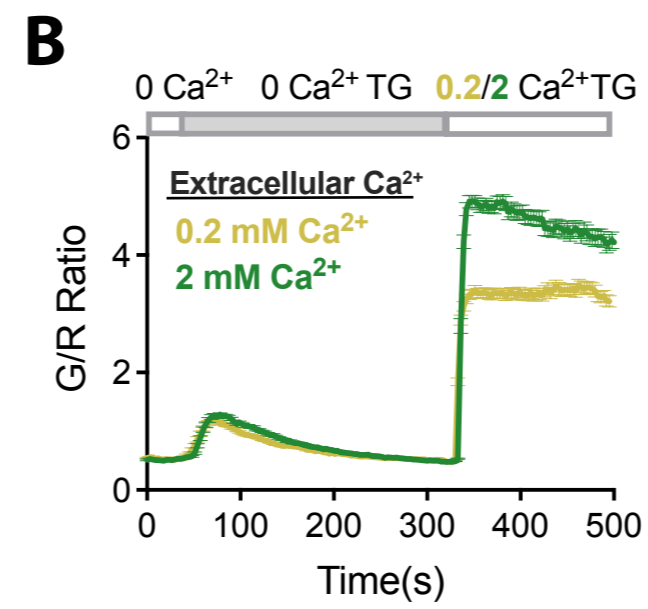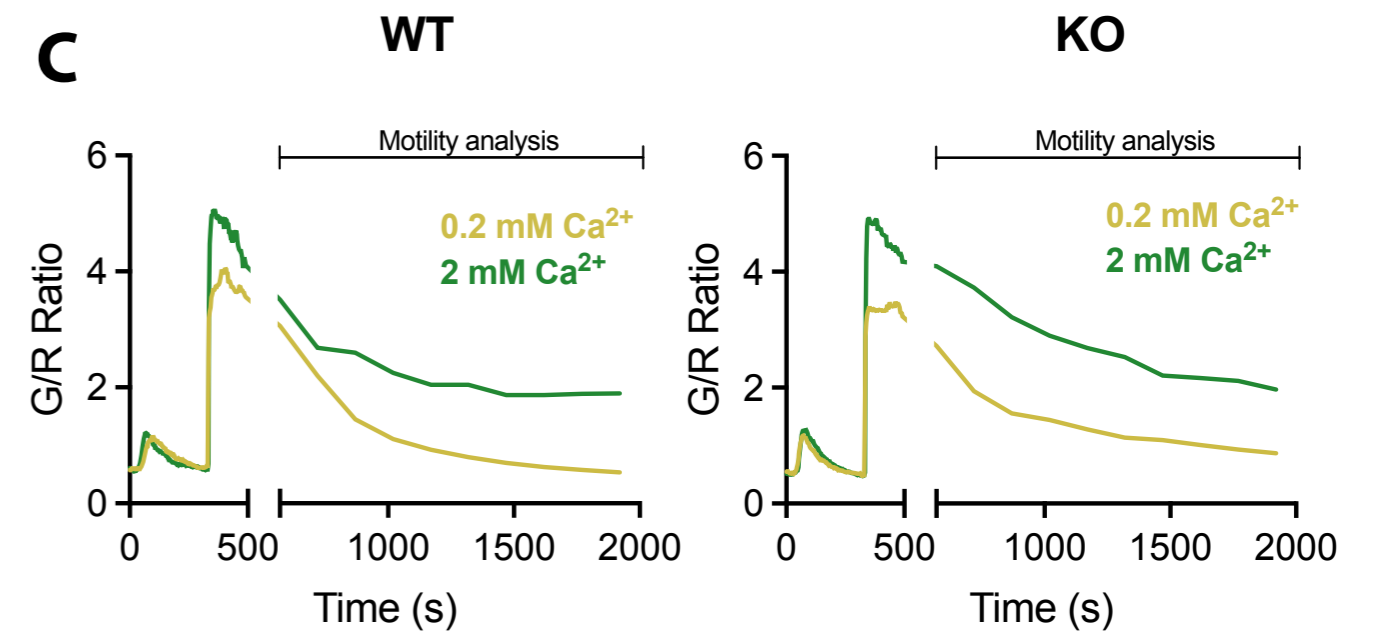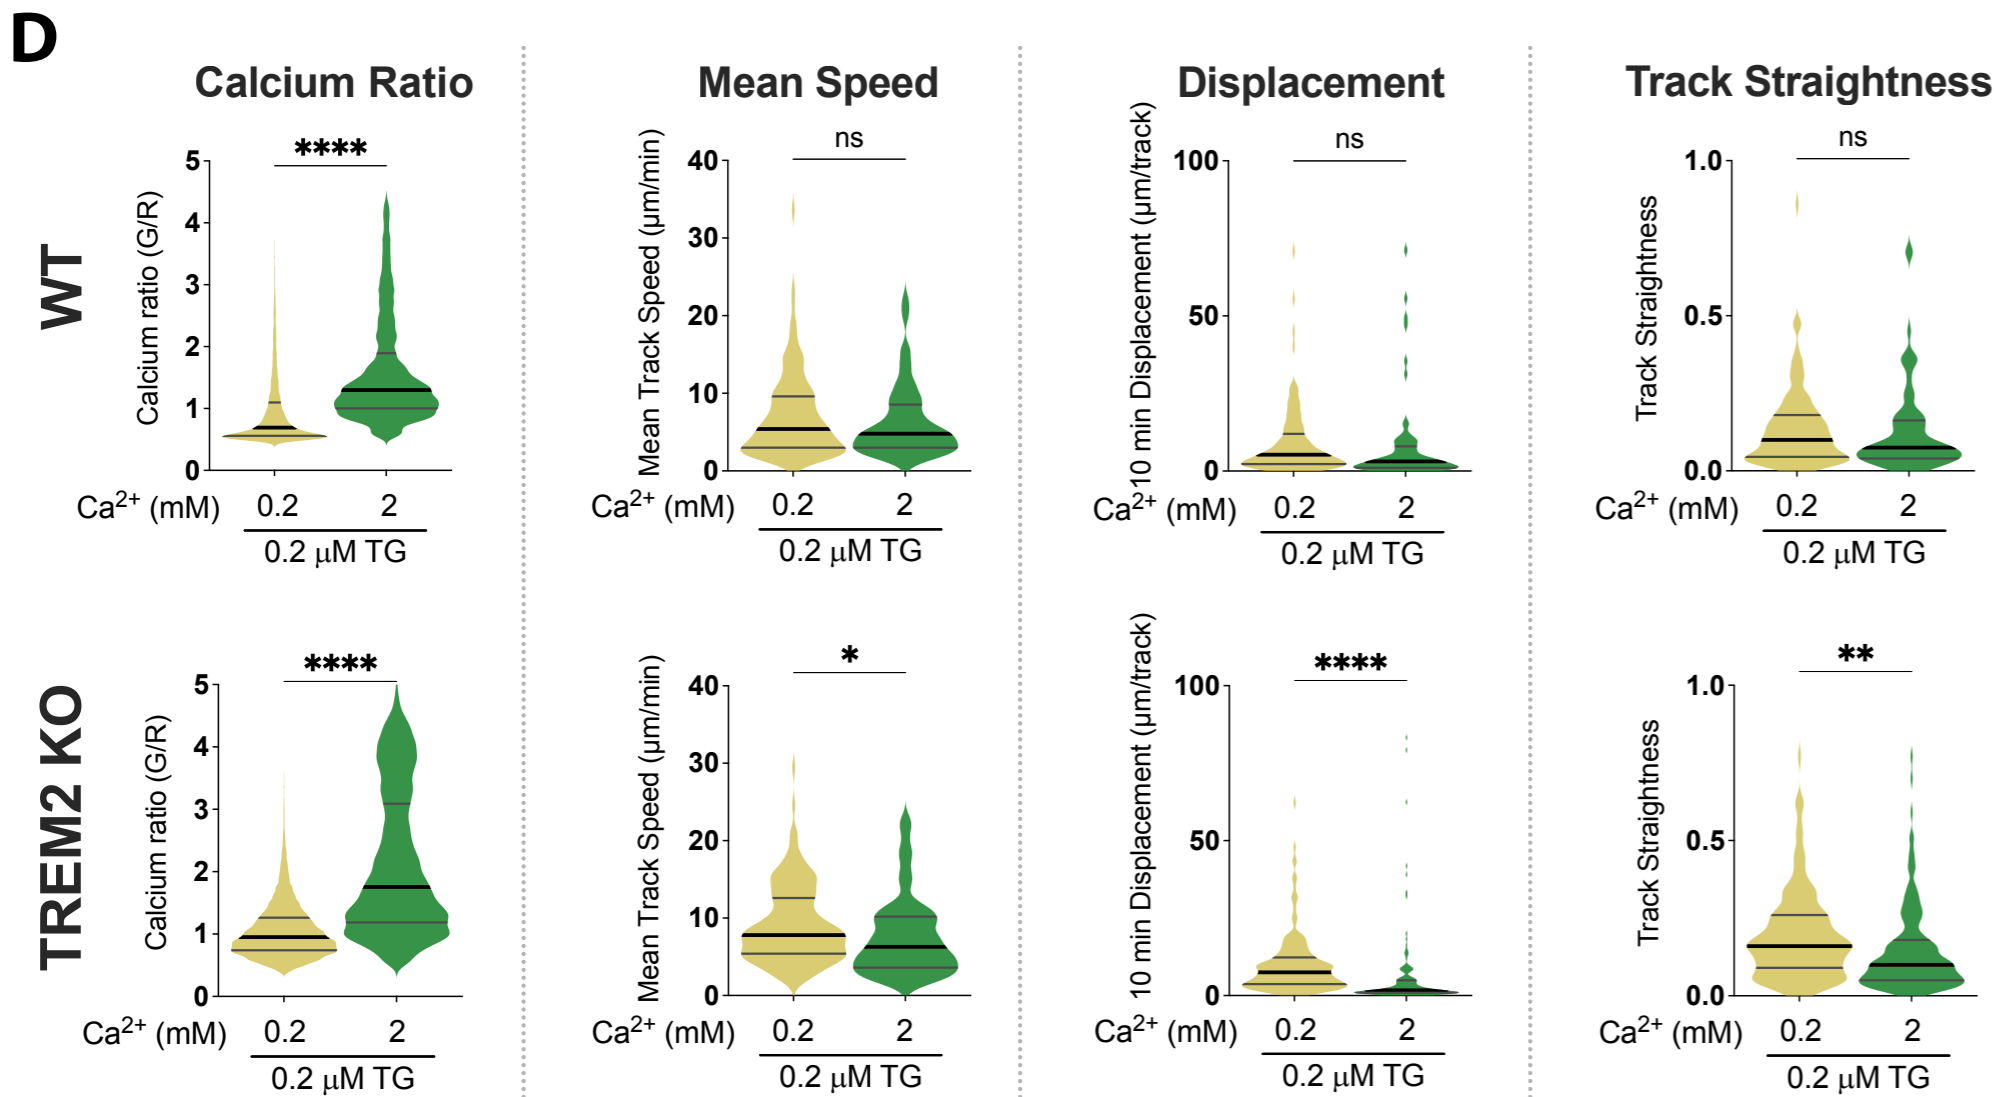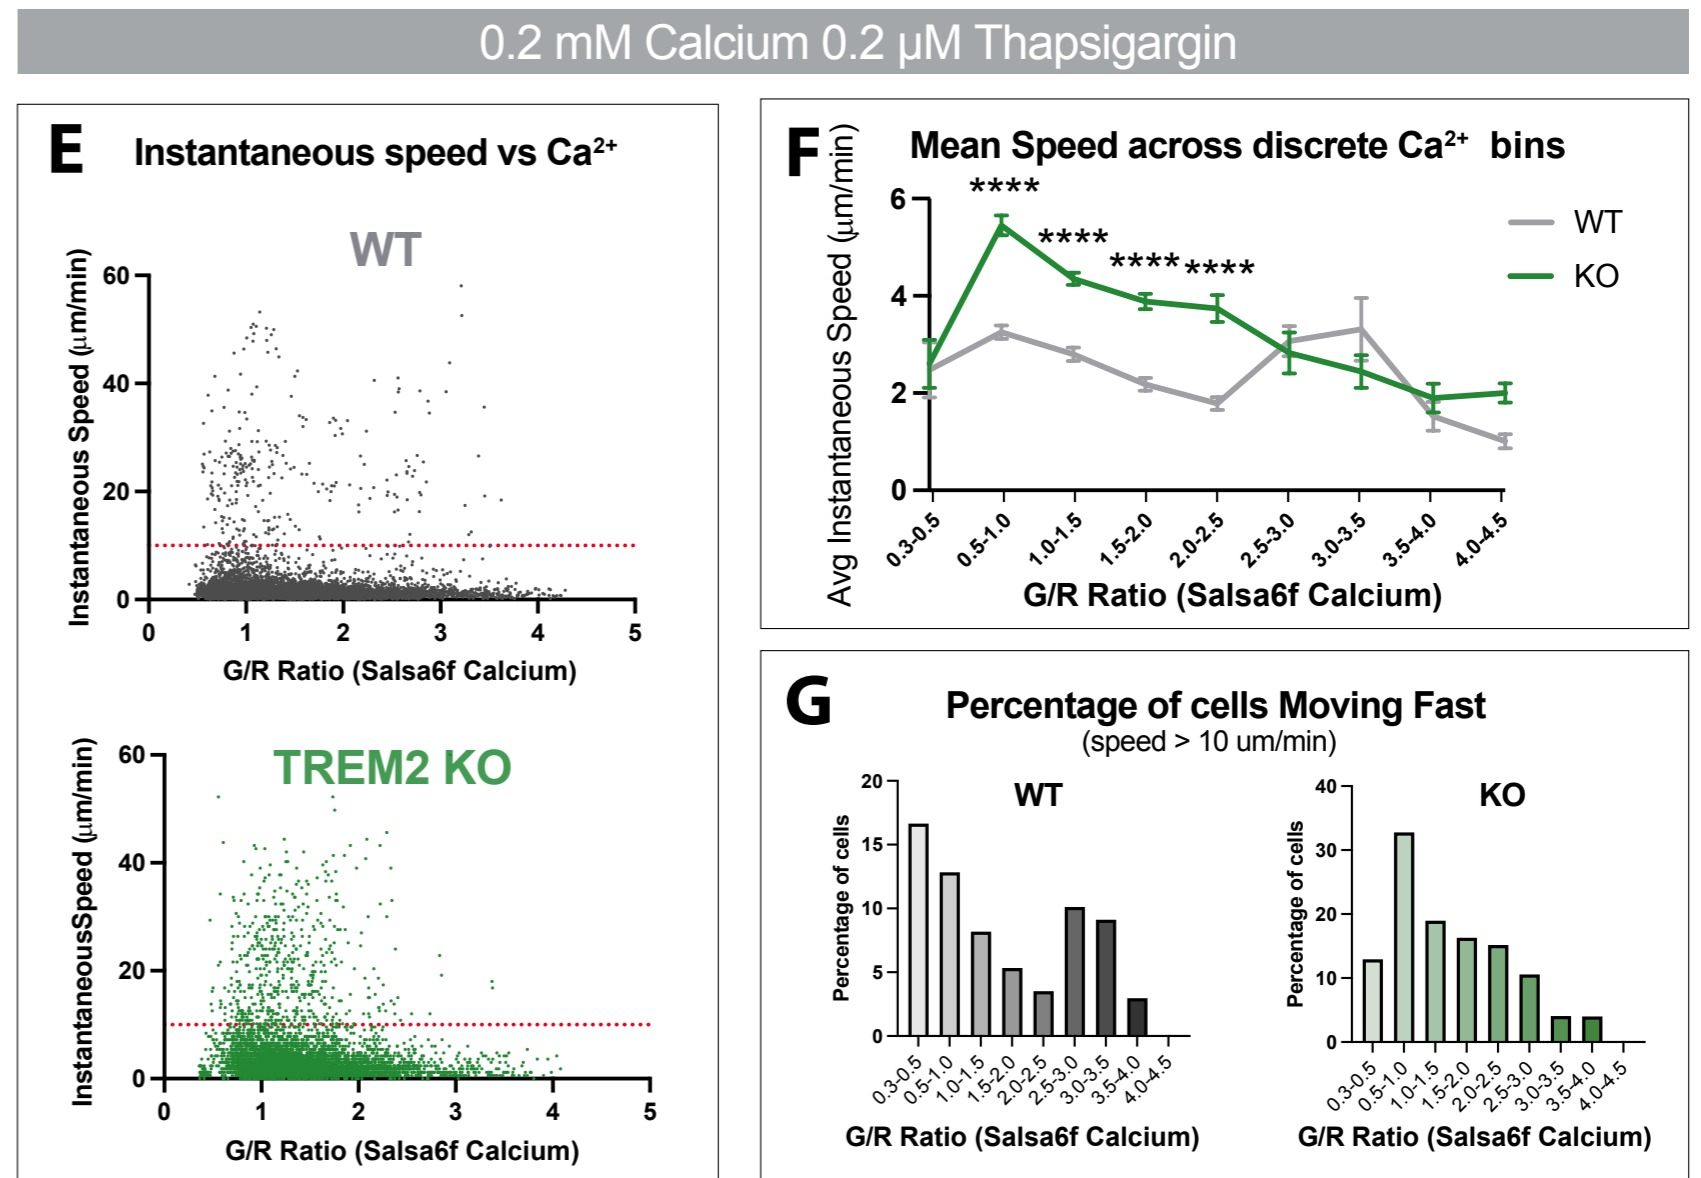

# Figure 6-figure supplement 1

bioRxiv preprint doi: <https://doi.org/10.1101/2021.08.24.457491>; this version posted January 27, 2022. The copyright holder for this preprint (which was not certified by peer review) is the author/funder, who has granted bioRxiv a license to display the preprint in perpetuity. It is made available under a [CC-BY-NC-ND 4.0 International license](https://creativecommons.org/licenses/by-nc-nd/4.0/).

## A

### Calcium and Displacement with ADP

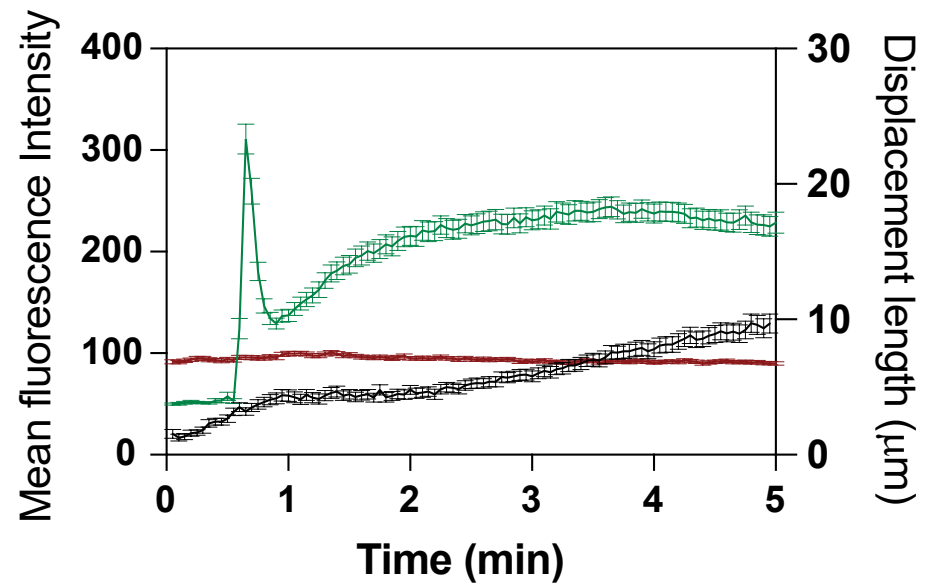

## B

### Calcium and Displacement post-ADP

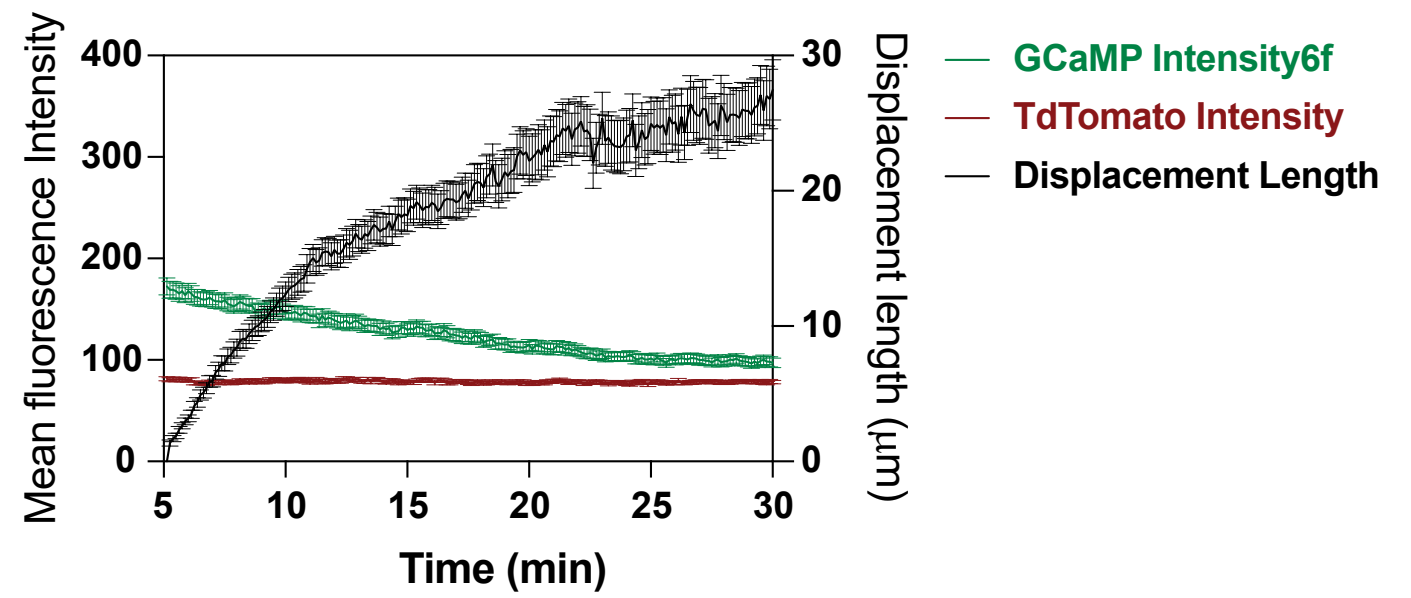



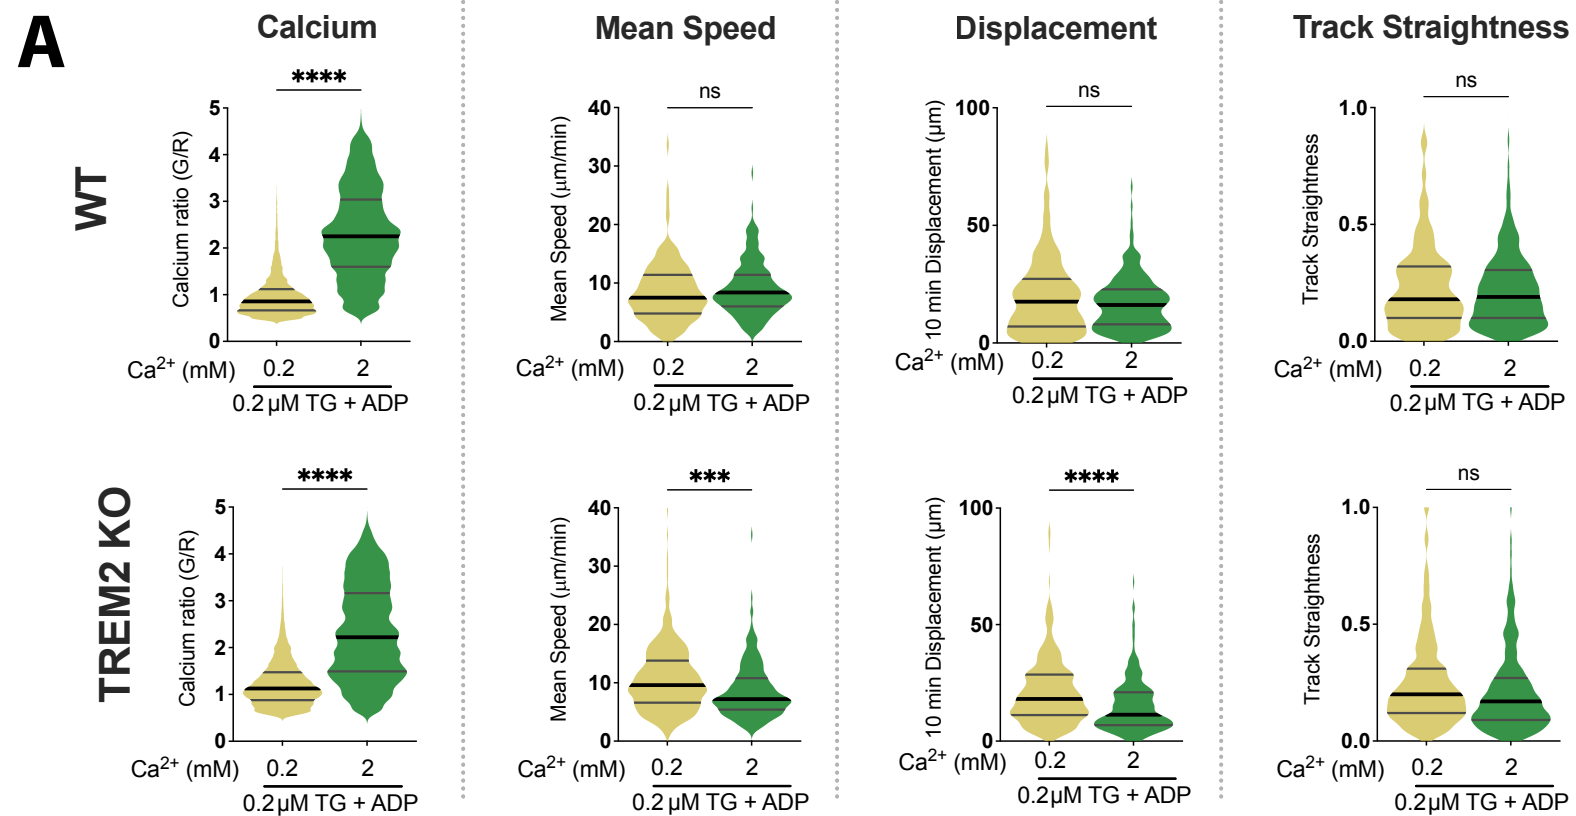

0.2 mM Calcium 0.2 µM Thapsigargin Displacement

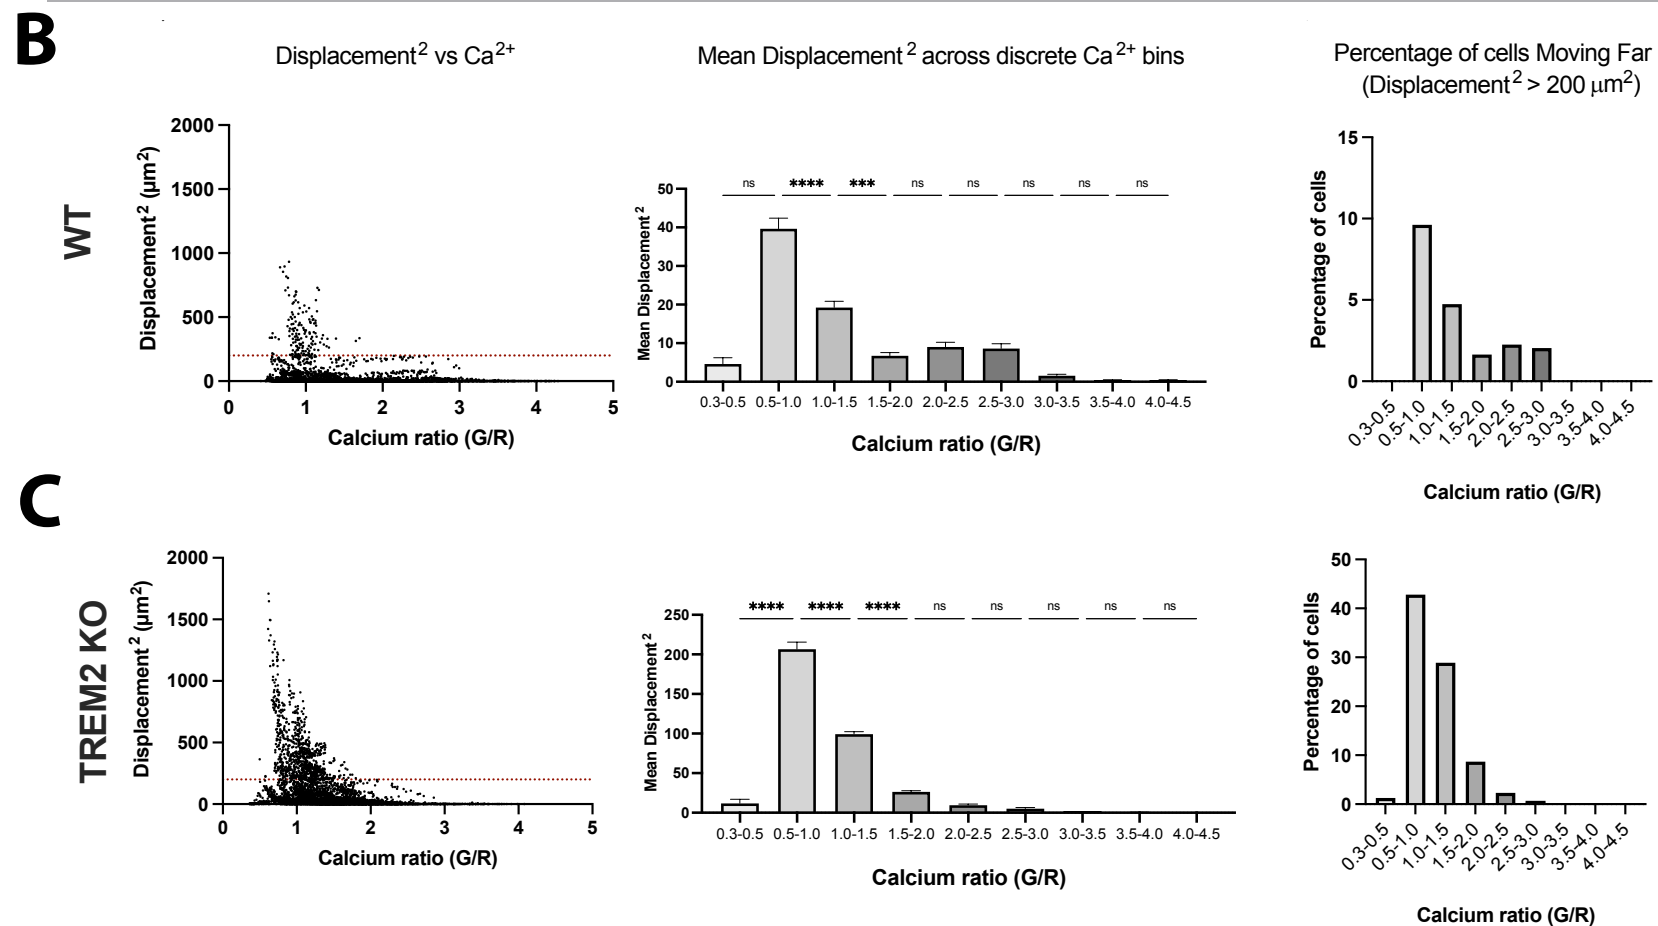

# Figure 7

## A

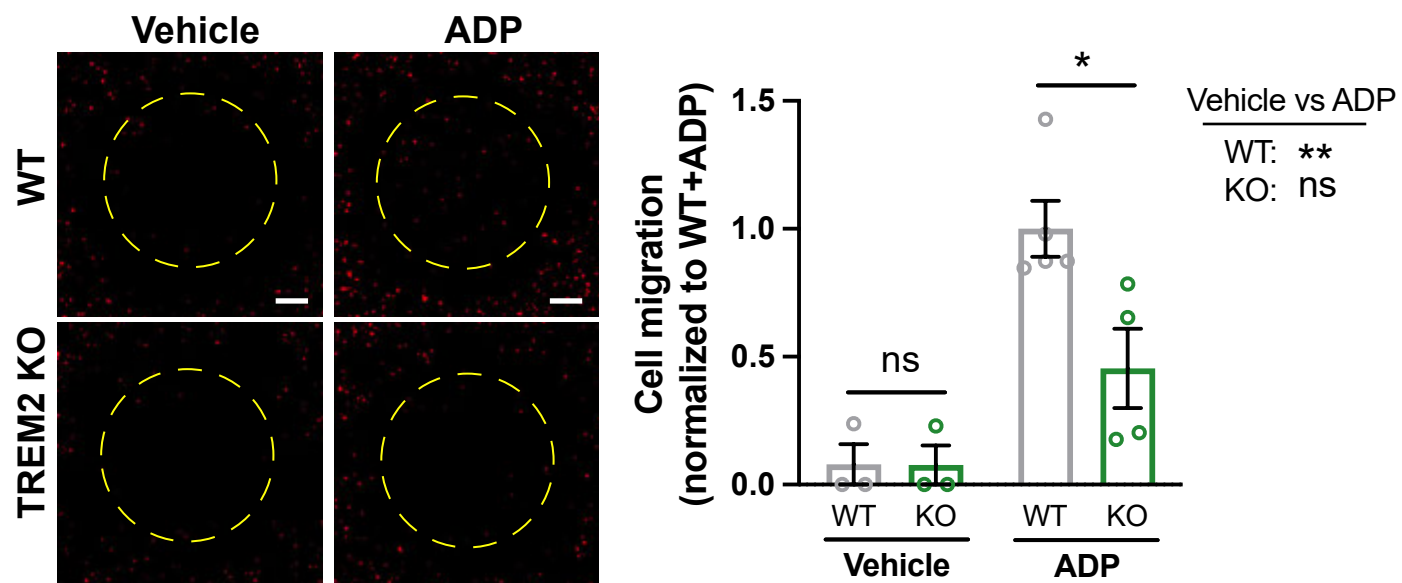

## B

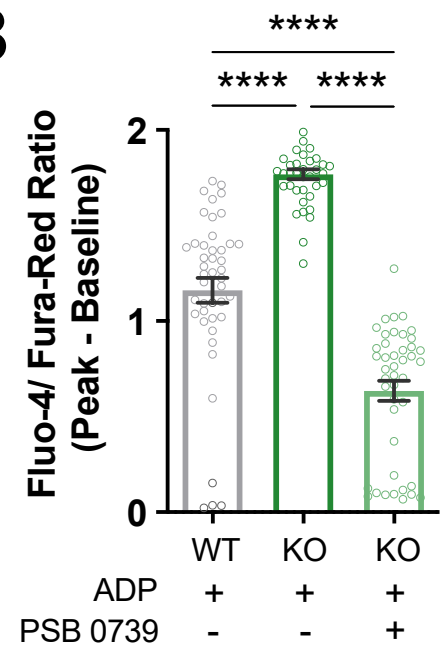

## C

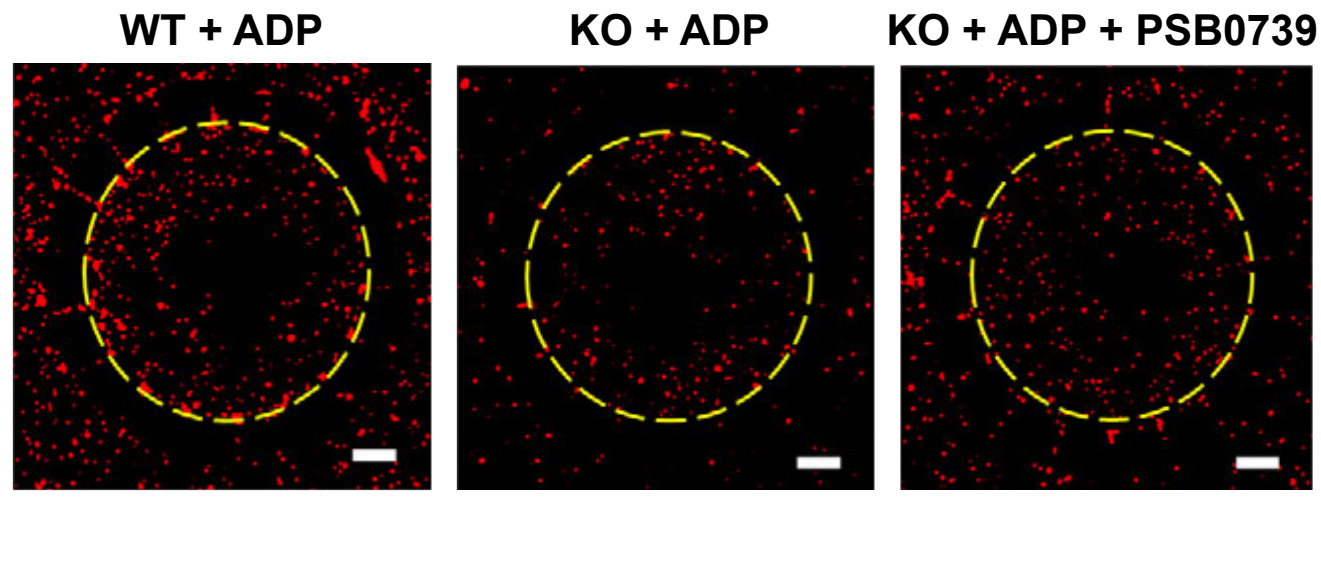

# Figure 7-figure supplement 1

bioRxiv preprint doi: <https://doi.org/10.1101/2021.08.24.457491>; this version posted January 27, 2022. The copyright holder for this preprint (which was not certified by peer review) is the author/funder, who has granted bioRxiv a license to display the preprint in perpetuity. It is made available under aCC-BY-NC-ND 4.0 International license.

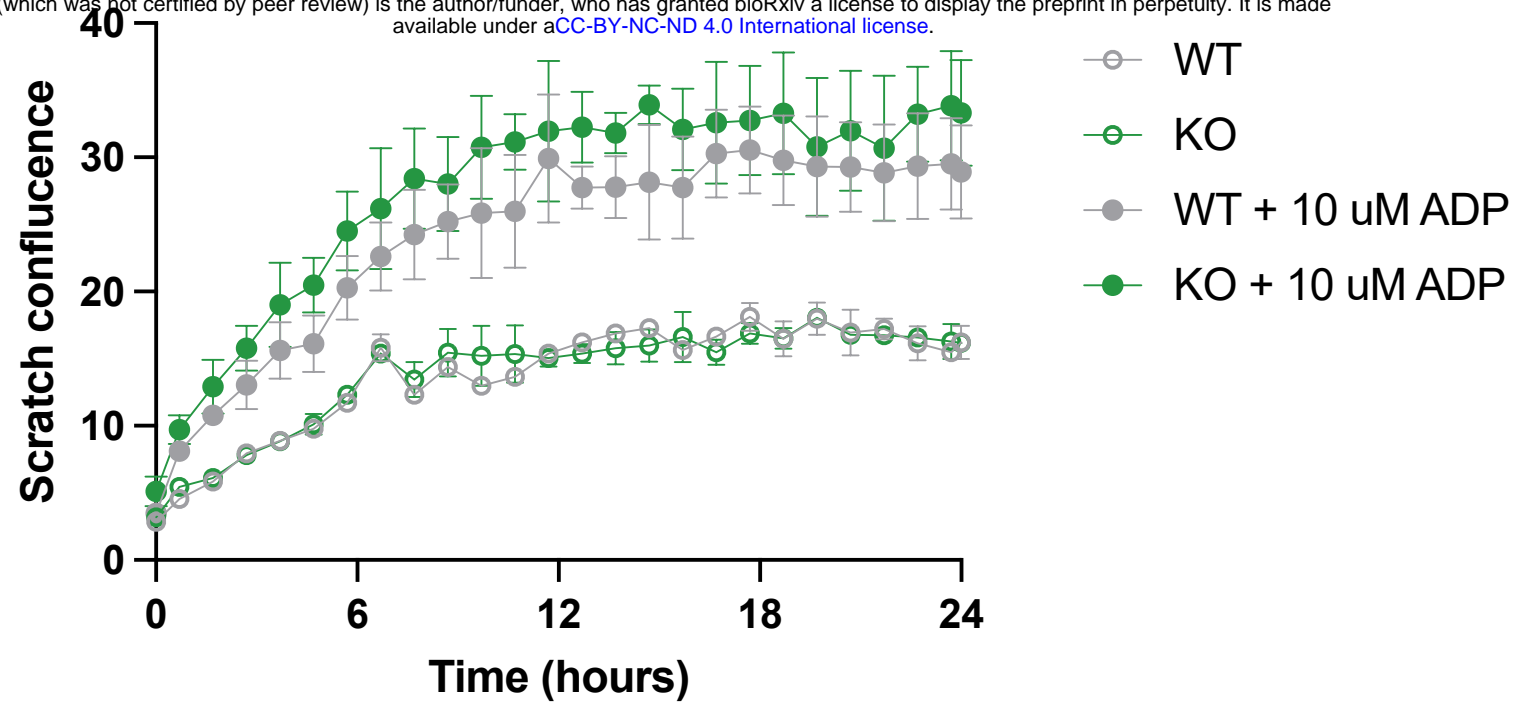

Source: https://www.biorxiv.org/content/10.1101/2021.08.24.457491v2.full.pdf
